# Supplementary material for: Vibration of effects resulting from treatment selection in mixed-treatment comparisons: a multiverse analysis on network meta-analyses of antidepressants in major depressive disorder
Source: PubMed Central journal article supplement — BMJ Evid Based Med. 2024 May 20;29(5):e112848. doi: 10.1136/bmjebm-2024-112848 (PMC11503165; doi:10.1136/bmjebm-2024-112848), 2024-05-20
Supplement: bmjebm-29-5-s001.pdf [file bmjebm-29-5-s001.pdf]

## Appendices

| Number of treatments in the networks | Theoretical number of possible NMAs | Non-connected networks<br>n (%) |                                  |
|--------------------------------------|-------------------------------------|---------------------------------|----------------------------------|
|                                      |                                     | <i>Treatment response</i>       | <i>Treatment discontinuation</i> |
| 2                                    | 231                                 | 132 (57.1)                      | 97 (58.0)                        |
| 3                                    | 1 540                               | 414 (26.9)                      | 435 (28.3)                       |
| 4                                    | 7 315                               | 924 (12.6)                      | 980 (13.4)                       |
| 5                                    | 26 334                              | 2 030 (7.71)                    | 2030 (7.71)                      |
| 6                                    | 74 613                              | 4 529 (6.07)                    | 4333 (5.81)                      |
| 7                                    | 170 544                             | 8 995 (5.27)                    | 8284 (4.86)                      |
| 8                                    | 319 770                             | 13 779 (4.31)                   | 12 555 (3.93)                    |
| 9                                    | 497 420                             | 15 946 (3.20)                   | 14 590 (2.93)                    |
| 10                                   | 646 646                             | 14 068 (2.18)                   | 13 014 (2.01)                    |
| 11                                   | 705 432                             | 9 548 (1.35)                    | 8 955 (1.27)                     |
| 12                                   | 646 646                             | 4 990 (0.77)                    | 4 795 (0.73)                     |
| 13                                   | 497 420                             | 1987 (0.40)                     | 1 919 (0.39)                     |
| 14                                   | 319 770                             | 585 (0.18)                      | 575 (0.18)                       |
| 15                                   | 170 544                             | 122 (0.07)                      | 121 (0.07)                       |
| 16                                   | 74 613                              | 16 (0.02)                       | 16 (0.02)                        |
| 17                                   | 26 334                              | 1 (0.01)                        | 1 (0.01)                         |
| 18                                   | 7 315                               | 0 (0)                           | 0 (0)                            |
| 19                                   | 1 540                               | 0 (0)                           | 0 (0)                            |
| 20                                   | 231                                 | 0 (0)                           | 0 (0)                            |
| 21                                   | 22                                  | 0 (0)                           | 0 (0)                            |
| 22                                   | 1                                   | 0 (0)                           | 0 (0)                            |

*e-Table 1: Number of possible NMAs (combinations of 22 treatments) and non-connected networks depending on the number of treatments per network.*

|                        | Treatment response                  |            |               | Number of direct comparisons | Treatment discontinuation           |            |               | Number of direct comparisons |
|------------------------|-------------------------------------|------------|---------------|------------------------------|-------------------------------------|------------|---------------|------------------------------|
|                        | Number of patients included in NMAs |            |               |                              | Number of patients included in NMAs |            |               |                              |
|                        | <i>min</i>                          | <i>max</i> | <i>median</i> |                              | <i>min</i>                          | <i>max</i> | <i>median</i> |                              |
| <i>Agomelatine</i>     | 202                                 | 5 035      | 2 905         | 6                            | 202                                 | 4 153      | 2 848         | 6                            |
| <i>Amitriptyline</i>   | 51                                  | 5 099      | 2 641         | 11                           | 41                                  | 4 270      | 2 465         | 12                           |
| <i>Bupropion</i>       | 63                                  | 4 502      | 2 954         | 7                            | 63                                  | 3 363      | 2 808         | 8                            |
| <i>Citalopram</i>      | 57                                  | 5 513      | 2 795         | 12                           | 25                                  | 4 013      | 2 577         | 12                           |
| <i>Clomipramine</i>    | 41                                  | 1 414      | 876           | 8                            | 20                                  | 1 201      | 799           | 7                            |
| <i>Desvenlafaxine</i>  | 315                                 | 2 962      | 2 647         | 2                            | 315                                 | 2 647      | 2 647         | 2                            |
| <i>Duloxetine</i>      | 152                                 | 7 218      | 3 855         | 8                            | 152                                 | 4 557      | 3 633         | 8                            |
| <i>Escitalopram</i>    | 227                                 | 7 500      | 4 174         | 9                            | 227                                 | 5 726      | 4 082         | 9                            |
| <i>Fluoxetine</i>      | 70                                  | 12 872     | 6 580         | 18                           | 70                                  | 9 443      | 6 178         | 17                           |
| <i>Fluvoxamine</i>     | 34                                  | 1 589      | 914           | 10                           | 20                                  | 1 708      | 1 016         | 10                           |
| <i>Levomilnacipran</i> | 1 603                               | 1 603      | 1 603         | 1                            | 1 693                               | 1 693      | 1 693         | 1                            |
| <i>Milnacipran</i>     | 27                                  | 1 410      | 832           | 6                            | 27                                  | 1 358      | 780           | 5                            |
| <i>Mirtazapine</i>     | 137                                 | 3 458      | 1813          | 9                            | 137                                 | 2 974      | 1 769         | 9                            |
| <i>Nefazodone</i>      | 55                                  | 1 150      | 887           | 5                            | 55                                  | 1 226      | 963           | 5                            |
| <i>Paroxetine</i>      | 85                                  | 13 559     | 7328          | 17                           | 85                                  | 11 329     | 7 484         | 17                           |
| <i>Placebo</i>         | 553                                 | 35 721     | 17 046        | 19                           | 18                                  | 27 225     | 16 371        | 20                           |
| <i>Reboxetine</i>      | 80                                  | 2 745      | 1 478         | 5                            | 229                                 | 1 866      | 1 478         | 4                            |
| <i>Sertraline</i>      | 26                                  | 6 431      | 3 414         | 14                           | 26                                  | 5 268      | 3 416         | 14                           |
| <i>Trazodone</i>       | 57                                  | 1 672      | 892           | 9                            | 61                                  | 1 362      | 840           | 8                            |
| <i>Venlafaxine</i>     | 77                                  | 9 245      | 4 768         | 16                           | 28                                  | 7 454      | 4 505         | 15                           |
| <i>Vilazodone</i>      | 104                                 | 2 939      | 2 009         | 3                            | 583                                 | 1 662      | 1 662         | 2                            |
| <i>Vortioxetine</i>    | 423                                 | 5 767      | 3 921         | 3                            | 423                                 | 4 134      | 3 921         | 3                            |

*e-Table 2: Number of patients included in all the NMAs (min, max and median) depending on treatments and the number of existing direct comparisons. The maximum number (max) corresponds to the number of patients included in the Cipriani et al. NMA.*

| <b><i>Treatment 1</i></b> | <b><i>Treatment 2</i></b> | <b><i>Direct Comparison</i></b> | <b><i>Indirect Comparison</i></b> | <b><i>p-value</i></b> |
|---------------------------|---------------------------|---------------------------------|-----------------------------------|-----------------------|
| Amitriptyline             | Agomelatine               | NA                              | 0.2628545818                      | NA                    |
| Amitriptyline             | Bupropion                 | NA                              | 0.3110530164                      | NA                    |
| Amitriptyline             | Citalopram                | -0.102606077                    | 0.3280538690                      | 0.0401724996          |
| Amitriptyline             | Clomipramine              | NA                              | 0.3018895237                      | NA                    |
| Amitriptyline             | Desvenlafaxine            | NA                              | 0.3475326245                      | NA                    |
| Amitriptyline             | Duloxetine                | NA                              | 0.1358470515                      | NA                    |
| Amitriptyline             | Escitalopram              | NA                              | 0.2189727794                      | NA                    |
| Amitriptyline             | Fluoxetine                | 0.053795624                     | 0.3603247403                      | 0.0487600664          |
| Amitriptyline             | Fluvoxamine               | 0.071775816                     | 0.2419257631                      | 0.4768777906          |
| Amitriptyline             | Levomilnacipran           | NA                              | 0.2523685911                      | NA                    |
| Amitriptyline             | Milnacipran               | 0.172384032                     | 0.2296723273                      | 0.8506146699          |
| Amitriptyline             | Mirtazapine               | 0.223224804                     | 0.1222418836                      | 0.5217504540          |
| Amitriptyline             | Nefazodone                | 1.174985267                     | 0.2524544792                      | 0.0280999326          |
| Amitriptyline             | Paroxetine                | 0.048965005                     | 0.2736055923                      | 0.0426094518          |
| Amitriptyline             | Placebo                   | 0.938820547                     | 0.5969926131                      | 0.0003148894          |
| Amitriptyline             | Reboxetine                | NA                              | 0.4731170934                      | NA                    |
| Amitriptyline             | Sertraline                | 0.244999893                     | 0.2642421676                      | 0.8792579720          |
| Amitriptyline             | Trazodone                 | 0.320605494                     | 0.3231299644                      | 0.9906336973          |
| Amitriptyline             | Venlafaxine               | 0.178736978                     | 0.2004497470                      | 0.9348442571          |
| Amitriptyline             | Vilazodone                | NA                              | 0.3124340953                      | NA                    |
| Amitriptyline             | Vortioxetine              | NA                              | 0.2380257250                      | NA                    |
| Bupropion                 | Agomelatine               | NA                              | -0.0481984346                     | NA                    |
| Bupropion                 | Citalopram                | NA                              | -0.0257216582                     | NA                    |
| Bupropion                 | Clomipramine              | NA                              | -0.0091634926                     | NA                    |
| Bupropion                 | Desvenlafaxine            | NA                              | 0.0364796081                      | NA                    |
| Bupropion                 | Duloxetine                | NA                              | -0.1752059648                     | NA                    |
| Bupropion                 | Escitalopram              | -0.067277902                    | -0.0958556599                     | 0.8767945398          |
| Bupropion                 | Fluoxetine                | -0.194336191                    | 0.0461107766                      | 0.1329183528          |
| Bupropion                 | Fluvoxamine               | NA                              | -0.0935871195                     | NA                    |

|                   |                        |              |               |              |
|-------------------|------------------------|--------------|---------------|--------------|
| <b>Bupropion</b>  | <b>Levomilnacipran</b> | <i>NA</i>    | -0.0586844252 | <i>NA</i>    |
| <b>Bupropion</b>  | <b>Milnacipran</b>     | <i>NA</i>    | -0.0880709175 | <i>NA</i>    |
| <b>Bupropion</b>  | <b>Mirtazapine</b>     | <i>NA</i>    | -0.1647516505 | <i>NA</i>    |
| <b>Bupropion</b>  | <b>Nefazodone</b>      | <i>NA</i>    | 0.0001118567  | <i>NA</i>    |
| <b>Bupropion</b>  | <b>Paroxetine</b>      | 0.008178822  | -0.1034383063 | 0.6892787799 |
| <b>Bupropion</b>  | <b>Placebo</b>         | 0.372328212  | 0.5398674615  | 0.1377180963 |
| <b>Bupropion</b>  | <b>Reboxetine</b>      | <i>NA</i>    | 0.1620640770  | <i>NA</i>    |
| <b>Bupropion</b>  | <b>Sertraline</b>      | 0.050941715  | -0.0800414091 | 0.3784752254 |
| <b>Bupropion</b>  | <b>Trazodone</b>       | 0.739667196  | -0.0358130579 | 0.0417853746 |
| <b>Bupropion</b>  | <b>Venlafaxine</b>     | -0.061897187 | -0.1204992482 | 0.7199084725 |
| <b>Bupropion</b>  | <b>Vilazodone</b>      | <i>NA</i>    | 0.0013810790  | <i>NA</i>    |
| <b>Bupropion</b>  | <b>Vortioxetine</b>    | <i>NA</i>    | -0.0730272914 | <i>NA</i>    |
| <b>Citalopram</b> | <b>Agomelatine</b>     | <i>NA</i>    | -0.0224767764 | <i>NA</i>    |
| <b>Citalopram</b> | <b>Clomipramine</b>    | -0.566756975 | 0.0535395153  | 0.1124443091 |
| <b>Citalopram</b> | <b>Desvenlafaxine</b>  | <i>NA</i>    | 0.0622012663  | <i>NA</i>    |
| <b>Citalopram</b> | <b>Duloxetine</b>      | <i>NA</i>    | -0.1494843066 | <i>NA</i>    |
| <b>Citalopram</b> | <b>Escitalopram</b>    | -0.283730192 | 0.0664509015  | 0.0023852407 |
| <b>Citalopram</b> | <b>Fluoxetine</b>      | -0.034011740 | 0.0453081012  | 0.6494119038 |
| <b>Citalopram</b> | <b>Fluvoxamine</b>     | 0.101741070  | -0.0836300282 | 0.5516355984 |
| <b>Citalopram</b> | <b>Levomilnacipran</b> | <i>NA</i>    | -0.0329627670 | <i>NA</i>    |
| <b>Citalopram</b> | <b>Milnacipran</b>     | <i>NA</i>    | -0.0623492593 | <i>NA</i>    |
| <b>Citalopram</b> | <b>Mirtazapine</b>     | 0.280517459  | -0.1571382927 | 0.2297273178 |
| <b>Citalopram</b> | <b>Nefazodone</b>      | <i>NA</i>    | 0.0258335149  | <i>NA</i>    |
| <b>Citalopram</b> | <b>Paroxetine</b>      | 0.304156910  | -0.0924611601 | 0.1121322543 |
| <b>Citalopram</b> | <b>Placebo</b>         | 0.436441606  | 0.4473552890  | 0.9090816409 |
| <b>Citalopram</b> | <b>Reboxetine</b>      | 0.422925722  | 0.1437125089  | 0.1752146756 |
| <b>Citalopram</b> | <b>Sertraline</b>      | -0.007698175 | -0.0292852927 | 0.9005076142 |
| <b>Citalopram</b> | <b>Trazodone</b>       | <i>NA</i>    | 0.0372908807  | <i>NA</i>    |
| <b>Citalopram</b> | <b>Venlafaxine</b>     | 0.484268986  | -0.1071005535 | 0.0567075668 |
| <b>Citalopram</b> | <b>Vilazodone</b>      | -0.065358962 | 0.0844028137  | 0.3330953339 |

|                       |                        |              |               |              |
|-----------------------|------------------------|--------------|---------------|--------------|
| <b>Citalopram</b>     | <b>Vortioxetine</b>    | NA           | -0.0473056332 | NA           |
| <b>Clomipramine</b>   | <b>Agomelatine</b>     | NA           | -0.0390349419 | NA           |
| <b>Clomipramine</b>   | <b>Desvenlafaxine</b>  | NA           | 0.0456431008  | NA           |
| <b>Clomipramine</b>   | <b>Duloxetine</b>      | NA           | -0.1660424722 | NA           |
| <b>Clomipramine</b>   | <b>Escitalopram</b>    | NA           | -0.0829167444 | NA           |
| <b>Clomipramine</b>   | <b>Fluoxetine</b>      | -0.497957162 | 0.1054376234  | 0.0127489998 |
| <b>Clomipramine</b>   | <b>Fluvoxamine</b>     | 0.617475812  | -0.1168157473 | 0.1651646212 |
| <b>Clomipramine</b>   | <b>Levomilnacipran</b> | NA           | -0.0495209326 | NA           |
| <b>Clomipramine</b>   | <b>Milnacipran</b>     | -0.139761942 | -0.0731081082 | 0.8718885420 |
| <b>Clomipramine</b>   | <b>Mirtazapine</b>     | NA           | -0.1555881578 | NA           |
| <b>Clomipramine</b>   | <b>Nefazodone</b>      | NA           | 0.0092753493  | NA           |
| <b>Clomipramine</b>   | <b>Paroxetine</b>      | -0.072886810 | -0.1096793809 | 0.8206326227 |
| <b>Clomipramine</b>   | <b>Placebo</b>         | NA           | 0.4255615996  | NA           |
| <b>Clomipramine</b>   | <b>Reboxetine</b>      | NA           | 0.1712275696  | NA           |
| <b>Clomipramine</b>   | <b>Sertraline</b>      | -0.044766923 | -0.0425473428 | 0.9933621158 |
| <b>Clomipramine</b>   | <b>Trazodone</b>       | 0.480053965  | -0.0193096301 | 0.2200867537 |
| <b>Clomipramine</b>   | <b>Venlafaxine</b>     | -0.097574136 | -0.1032336858 | 0.9818064963 |
| <b>Clomipramine</b>   | <b>Vilazodone</b>      | NA           | 0.0105445716  | NA           |
| <b>Clomipramine</b>   | <b>Vortioxetine</b>    | NA           | -0.0638637987 | NA           |
| <b>Desvenlafaxine</b> | <b>Agomelatine</b>     | NA           | -0.0846780427 | NA           |
| <b>Desvenlafaxine</b> | <b>Duloxetine</b>      | -0.188098067 | -0.2155903493 | 0.8964955808 |
| <b>Desvenlafaxine</b> | <b>Escitalopram</b>    | NA           | -0.1285598451 | NA           |
| <b>Desvenlafaxine</b> | <b>Fluoxetine</b>      | NA           | -0.0254245515 | NA           |
| <b>Desvenlafaxine</b> | <b>Fluvoxamine</b>     | NA           | -0.1300667276 | NA           |
| <b>Desvenlafaxine</b> | <b>Levomilnacipran</b> | NA           | -0.0951640333 | NA           |
| <b>Desvenlafaxine</b> | <b>Milnacipran</b>     | NA           | -0.1245505256 | NA           |
| <b>Desvenlafaxine</b> | <b>Mirtazapine</b>     | NA           | -0.2012312586 | NA           |
| <b>Desvenlafaxine</b> | <b>Nefazodone</b>      | NA           | -0.0363677514 | NA           |
| <b>Desvenlafaxine</b> | <b>Paroxetine</b>      | NA           | -0.1350876670 | NA           |
| <b>Desvenlafaxine</b> | <b>Placebo</b>         | 0.373085926  | 0.5136446059  | 0.6292754589 |

|                       |                        |              |               |              |
|-----------------------|------------------------|--------------|---------------|--------------|
| <b>Desvenlafaxine</b> | <b>Reboxetine</b>      | <i>NA</i>    | 0.1255844689  | <i>NA</i>    |
| <b>Desvenlafaxine</b> | <b>Sertraline</b>      | <i>NA</i>    | -0.0884706003 | <i>NA</i>    |
| <b>Desvenlafaxine</b> | <b>Trazodone</b>       | <i>NA</i>    | -0.0249103856 | <i>NA</i>    |
| <b>Desvenlafaxine</b> | <b>Venlafaxine</b>     | <i>NA</i>    | -0.1480757064 | <i>NA</i>    |
| <b>Desvenlafaxine</b> | <b>Vilazodone</b>      | <i>NA</i>    | -0.0350985291 | <i>NA</i>    |
| <b>Desvenlafaxine</b> | <b>Vortioxetine</b>    | <i>NA</i>    | -0.1095068995 | <i>NA</i>    |
| <b>Duloxetine</b>     | <b>Agomelatine</b>     | 0.274785749  | 0.1129526460  | 0.4616186963 |
| <b>Duloxetine</b>     | <b>Escitalopram</b>    | -0.129777944 | 0.1387688629  | 0.0485693271 |
| <b>Duloxetine</b>     | <b>Fluoxetine</b>      | 0.208338577  | 0.1855624134  | 0.9386435946 |
| <b>Duloxetine</b>     | <b>Fluvoxamine</b>     | <i>NA</i>    | 0.0816188454  | <i>NA</i>    |
| <b>Duloxetine</b>     | <b>Levomilnacipran</b> | <i>NA</i>    | 0.1165215396  | <i>NA</i>    |
| <b>Duloxetine</b>     | <b>Milnacipran</b>     | <i>NA</i>    | 0.0871350473  | <i>NA</i>    |
| <b>Duloxetine</b>     | <b>Mirtazapine</b>     | <i>NA</i>    | 0.0104543144  | <i>NA</i>    |
| <b>Duloxetine</b>     | <b>Nefazodone</b>      | <i>NA</i>    | 0.1753178215  | <i>NA</i>    |
| <b>Duloxetine</b>     | <b>Paroxetine</b>      | -0.028170294 | 0.1165746749  | 0.1804849096 |
| <b>Duloxetine</b>     | <b>Placebo</b>         | 0.643071126  | 0.5086145539  | 0.1232169794 |
| <b>Duloxetine</b>     | <b>Reboxetine</b>      | <i>NA</i>    | 0.3372700418  | <i>NA</i>    |
| <b>Duloxetine</b>     | <b>Sertraline</b>      | <i>NA</i>    | 0.1232149726  | <i>NA</i>    |
| <b>Duloxetine</b>     | <b>Trazodone</b>       | <i>NA</i>    | 0.1867751874  | <i>NA</i>    |
| <b>Duloxetine</b>     | <b>Venlafaxine</b>     | -0.103979394 | 0.0894187835  | 0.2109556777 |
| <b>Duloxetine</b>     | <b>Vilazodone</b>      | <i>NA</i>    | 0.1765870438  | <i>NA</i>    |
| <b>Duloxetine</b>     | <b>Vortioxetine</b>    | 0.310049659  | -0.0759190529 | 0.0010440706 |
| <b>Escitalopram</b>   | <b>Agomelatine</b>     | -0.201731585 | 0.0648594854  | 0.2424154728 |
| <b>Escitalopram</b>   | <b>Fluoxetine</b>      | 0.136576294  | 0.0991991480  | 0.8158829310 |
| <b>Escitalopram</b>   | <b>Fluvoxamine</b>     | <i>NA</i>    | -0.0015068825 | <i>NA</i>    |
| <b>Escitalopram</b>   | <b>Levomilnacipran</b> | <i>NA</i>    | 0.0333958118  | <i>NA</i>    |
| <b>Escitalopram</b>   | <b>Milnacipran</b>     | <i>NA</i>    | 0.0040093195  | <i>NA</i>    |
| <b>Escitalopram</b>   | <b>Mirtazapine</b>     | <i>NA</i>    | -0.0726714135 | <i>NA</i>    |
| <b>Escitalopram</b>   | <b>Nefazodone</b>      | <i>NA</i>    | 0.0921920937  | <i>NA</i>    |
| <b>Escitalopram</b>   | <b>Paroxetine</b>      | 0.009352299  | -0.0093588379 | 0.8893715245 |

|                     |                        |              |               |              |
|---------------------|------------------------|--------------|---------------|--------------|
| <b>Escitalopram</b> | <b>Placebo</b>         | 0.376739990  | 0.6851078767  | 0.0002348213 |
| <b>Escitalopram</b> | <b>Reboxetine</b>      | <i>NA</i>    | 0.2541443140  | <i>NA</i>    |
| <b>Escitalopram</b> | <b>Sertraline</b>      | -0.121781020 | 0.0570556983  | 0.3514520002 |
| <b>Escitalopram</b> | <b>Trazodone</b>       | <i>NA</i>    | 0.1036494595  | <i>NA</i>    |
| <b>Escitalopram</b> | <b>Venlafaxine</b>     | 0.189093418  | -0.0351699432 | 0.2764885341 |
| <b>Escitalopram</b> | <b>Vilazodone</b>      | <i>NA</i>    | 0.0934613160  | <i>NA</i>    |
| <b>Escitalopram</b> | <b>Vortioxetine</b>    | <i>NA</i>    | 0.0190529456  | <i>NA</i>    |
| <b>Fluoxetine</b>   | <b>Agomelatine</b>     | -0.025549948 | -0.0734299595 | 0.6815810074 |
| <b>Fluoxetine</b>   | <b>Fluvoxamine</b>     | -0.033251115 | -0.1133320731 | 0.7536403485 |
| <b>Fluoxetine</b>   | <b>Levomilnacipran</b> | <i>NA</i>    | -0.0697394819 | <i>NA</i>    |
| <b>Fluoxetine</b>   | <b>Milnacipran</b>     | 0.139546188  | -0.1736714199 | 0.1498414441 |
| <b>Fluoxetine</b>   | <b>Mirtazapine</b>     | -0.216699622 | -0.1643462082 | 0.7237283678 |
| <b>Fluoxetine</b>   | <b>Nefazodone</b>      | -0.032716229 | -0.0086591028 | 0.9424264971 |
| <b>Fluoxetine</b>   | <b>Paroxetine</b>      | 0.019915211  | -0.1495191200 | 0.0616613275 |
| <b>Fluoxetine</b>   | <b>Placebo</b>         | 0.320753668  | 0.4799532988  | 0.0139482475 |
| <b>Fluoxetine</b>   | <b>Reboxetine</b>      | 0.215661515  | 0.1332498799  | 0.6154363424 |
| <b>Fluoxetine</b>   | <b>Sertraline</b>      | -0.304034795 | -0.0062838999 | 0.0149414680 |
| <b>Fluoxetine</b>   | <b>Trazodone</b>       | -0.183371544 | 0.0197036916  | 0.4714020806 |
| <b>Fluoxetine</b>   | <b>Venlafaxine</b>     | -0.183043491 | -0.0893346037 | 0.2827871304 |
| <b>Fluoxetine</b>   | <b>Vilazodone</b>      | 0.380205441  | -0.0355025014 | 0.1665457088 |
| <b>Fluoxetine</b>   | <b>Vortioxetine</b>    | <i>NA</i>    | -0.0840823481 | <i>NA</i>    |
| <b>Fluvoxamine</b>  | <b>Agomelatine</b>     | <i>NA</i>    | 0.0453886849  | <i>NA</i>    |
| <b>Fluvoxamine</b>  | <b>Levomilnacipran</b> | <i>NA</i>    | 0.0349026942  | <i>NA</i>    |
| <b>Fluvoxamine</b>  | <b>Milnacipran</b>     | -0.539137174 | 0.1116615076  | 0.0316414371 |
| <b>Fluvoxamine</b>  | <b>Mirtazapine</b>     | -0.127460840 | -0.0581967510 | 0.7616675626 |
| <b>Fluvoxamine</b>  | <b>Nefazodone</b>      | <i>NA</i>    | 0.0936989761  | <i>NA</i>    |
| <b>Fluvoxamine</b>  | <b>Paroxetine</b>      | -0.138010659 | 0.0046648401  | 0.6499928574 |
| <b>Fluvoxamine</b>  | <b>Placebo</b>         | 0.712354291  | 0.3881368907  | 0.0390258955 |
| <b>Fluvoxamine</b>  | <b>Reboxetine</b>      | <i>NA</i>    | 0.2556511965  | <i>NA</i>    |
| <b>Fluvoxamine</b>  | <b>Sertraline</b>      | 0.439918610  | 0.0089980221  | 0.1741009886 |

|                 |              |              |               |              |
|-----------------|--------------|--------------|---------------|--------------|
| Fluvoxamine     | Trazodone    | NA           | 0.1051563420  | NA           |
| Fluvoxamine     | Venlafaxine  | -0.860580125 | 0.0154566365  | 0.0409952157 |
| Fluvoxamine     | Vilazodone   | NA           | 0.0949681984  | NA           |
| Fluvoxamine     | Vortioxetine | NA           | 0.0205598281  | NA           |
| Levomilnacipran | Agomelatine  | NA           | 0.0104859906  | NA           |
| Levomilnacipran | Milnacipran  | NA           | -0.0293864923 | NA           |
| Levomilnacipran | Mirtazapine  | NA           | -0.1060672252 | NA           |
| Levomilnacipran | Nefazodone   | NA           | 0.0587962819  | NA           |
| Levomilnacipran | Paroxetine   | NA           | -0.0399236337 | NA           |
| Levomilnacipran | Placebo      | 0.475082532  | NA            | NA           |
| Levomilnacipran | Reboxetine   | NA           | 0.2207485022  | NA           |
| Levomilnacipran | Sertraline   | NA           | 0.0066934330  | NA           |
| Levomilnacipran | Trazodone    | NA           | 0.0702536478  | NA           |
| Levomilnacipran | Venlafaxine  | NA           | -0.0529116731 | NA           |
| Levomilnacipran | Vilazodone   | NA           | 0.0600655042  | NA           |
| Levomilnacipran | Vortioxetine | NA           | -0.0143428662 | NA           |
| Milnacipran     | Agomelatine  | NA           | 0.0398724829  | NA           |
| Milnacipran     | Mirtazapine  | NA           | -0.0766807330 | NA           |
| Milnacipran     | Nefazodone   | NA           | 0.0881827742  | NA           |
| Milnacipran     | Paroxetine   | -0.044842408 | 0.0306830225  | 0.6754168807 |
| Milnacipran     | Placebo      | NA           | 0.5044690245  | NA           |
| Milnacipran     | Reboxetine   | NA           | 0.2501349945  | NA           |
| Milnacipran     | Sertraline   | 0.735706795  | 0.0278703296  | 0.4412703838 |
| Milnacipran     | Trazodone    | NA           | 0.0996401400  | NA           |
| Milnacipran     | Venlafaxine  | NA           | -0.0235251808 | NA           |
| Milnacipran     | Vilazodone   | NA           | 0.0894519965  | NA           |
| Milnacipran     | Vortioxetine | NA           | 0.0150436261  | NA           |
| Mirtazapine     | Agomelatine  | NA           | 0.1165532159  | NA           |
| Mirtazapine     | Nefazodone   | NA           | 0.1648635072  | NA           |
| Mirtazapine     | Paroxetine   | 0.005673482  | 0.0817807684  | 0.6140300627 |



|                    |                     |              |              |              |
|--------------------|---------------------|--------------|--------------|--------------|
| <b>Mirtazapine</b> | <b>Placebo</b>      | 0.549923659  | 0.5933184584 | 0.7380324256 |
| <b>Mirtazapine</b> | <b>Reboxetine</b>   | <i>NA</i>    | 0.326815727  | <i>NA</i>    |
| <b>Mirtazapine</b> | <b>Sertraline</b>   | -0.026210267 | 0.126153937  | 0.5238955038 |
| <b>Mirtazapine</b> | <b>Trazodone</b>    | 0.406691038  | 0.133301754  | 0.2828841214 |
| <b>Mirtazapine</b> | <b>Venlafaxine</b>  | 0.312313796  | 0.012104556  | 0.1093671834 |
| <b>Mirtazapine</b> | <b>Vilazodone</b>   | <i>NA</i>    | 0.166132729  | <i>NA</i>    |
| <b>Mirtazapine</b> | <b>Vortioxetine</b> | <i>NA</i>    | 0.091724359  | <i>NA</i>    |
| <b>Nefazodone</b>  | <b>Agomelatine</b>  | <i>NA</i>    | -0.048310291 | <i>NA</i>    |
| <b>Nefazodone</b>  | <b>Paroxetine</b>   | -0.234943929 | -0.076996433 | 0.5751609309 |
| <b>Nefazodone</b>  | <b>Placebo</b>      | 0.483312015  | 0.291726936  | 0.3304415983 |
| <b>Nefazodone</b>  | <b>Reboxetine</b>   | <i>NA</i>    | 0.161952220  | <i>NA</i>    |
| <b>Nefazodone</b>  | <b>Sertraline</b>   | 0.154150680  | -0.075321510 | 0.4922703055 |
| <b>Nefazodone</b>  | <b>Trazodone</b>    | <i>NA</i>    | 0.011457366  | <i>NA</i>    |
| <b>Nefazodone</b>  | <b>Venlafaxine</b>  | <i>NA</i>    | -0.111707955 | <i>NA</i>    |
| <b>Nefazodone</b>  | <b>Vilazodone</b>   | <i>NA</i>    | 0.001269222  | <i>NA</i>    |
| <b>Nefazodone</b>  | <b>Vortioxetine</b> | <i>NA</i>    | -0.073139148 | <i>NA</i>    |
| <b>Paroxetine</b>  | <b>Agomelatine</b>  | 0.158188236  | 0.008740364  | 0.2082025448 |
| <b>Paroxetine</b>  | <b>Placebo</b>      | 0.484462603  | 0.547342312  | 0.3127804656 |
| <b>Paroxetine</b>  | <b>Reboxetine</b>   | 0.201096477  | 0.295690853  | 0.4894783605 |
| <b>Paroxetine</b>  | <b>Sertraline</b>   | -0.091584848 | 0.057403216  | 0.4275653777 |
| <b>Paroxetine</b>  | <b>Trazodone</b>    | 0.553643797  | 0.055562943  | 0.0575412015 |
| <b>Paroxetine</b>  | <b>Venlafaxine</b>  | -0.370431258 | 0.026910313  | 0.0063955643 |
| <b>Paroxetine</b>  | <b>Vilazodone</b>   | <i>NA</i>    | 0.099989138  | <i>NA</i>    |
| <b>Paroxetine</b>  | <b>Vortioxetine</b> | <i>NA</i>    | 0.025580768  | <i>NA</i>    |
| <b>Placebo</b>     | <b>Agomelatine</b>  | -0.425199608 | -0.513388158 | 0.3699878290 |
| <b>Placebo</b>     | <b>Reboxetine</b>   | -0.256528933 | -0.250794581 | 0.9648415664 |
| <b>Placebo</b>     | <b>Sertraline</b>   | -0.440341666 | -0.491850753 | 0.5440726807 |
| <b>Placebo</b>     | <b>Trazodone</b>    | -0.619144485 | -0.222019213 | 0.0121407292 |
| <b>Placebo</b>     | <b>Venlafaxine</b>  | -0.533356677 | -0.524008095 | 0.9001170031 |
| <b>Placebo</b>     | <b>Vilazodone</b>   | -0.390079935 | -0.569582507 | 0.3478702822 |

|              |              |              |              |              |
|--------------|--------------|--------------|--------------|--------------|
| Placebo      | Vortioxetine | -0.532569068 | -0.297080011 | 0.0695474114 |
| Reboxetine   | Agomelatine  | NA           | -0.210262512 | NA           |
| Reboxetine   | Sertraline   | NA           | -0.214055069 | NA           |
| Reboxetine   | Trazodone    | NA           | -0.150494854 | NA           |
| Reboxetine   | Venlafaxine  | 0.043675064  | -0.290941338 | 0.2960991956 |
| Reboxetine   | Vilazodone   | NA           | -0.160682998 | NA           |
| Reboxetine   | Vortioxetine | NA           | -0.235091368 | NA           |
| Sertraline   | Agomelatine  | NA           | 0.003792558  | NA           |
| Sertraline   | Trazodone    | -0.580628978 | 0.096585865  | 0.0931431844 |
| Sertraline   | Venlafaxine  | -0.118393339 | -0.048047770 | 0.6104403654 |
| Sertraline   | Vilazodone   | NA           | 0.053372071  | NA           |
| Sertraline   | Vortioxetine | NA           | -0.021036299 | NA           |
| Trazodone    | Agomelatine  | NA           | -0.059767657 | NA           |
| Trazodone    | Venlafaxine  | -0.447444098 | -0.083679895 | 0.1808086564 |
| Trazodone    | Vilazodone   | NA           | -0.010188144 | NA           |
| Trazodone    | Vortioxetine | NA           | -0.084596514 | NA           |
| Venlafaxine  | Agomelatine  | -0.311033780 | 0.100343523  | 0.0418085120 |
| Venlafaxine  | Vilazodone   | NA           | 0.112977177  | NA           |
| Venlafaxine  | Vortioxetine | -0.190498925 | 0.077825383  | 0.1111422601 |
| Vilazodone   | Agomelatine  | NA           | -0.049579514 | NA           |
| Vilazodone   | Vortioxetine | NA           | -0.074408370 | NA           |
| Vortioxetine | Agomelatine  | NA           | 0.024828857  | NA           |

*eTable-3: Results of the inconsistency test from the most complete NMA, the p-value come from the z test use in the netsplit function, with a threshold <0.10..*

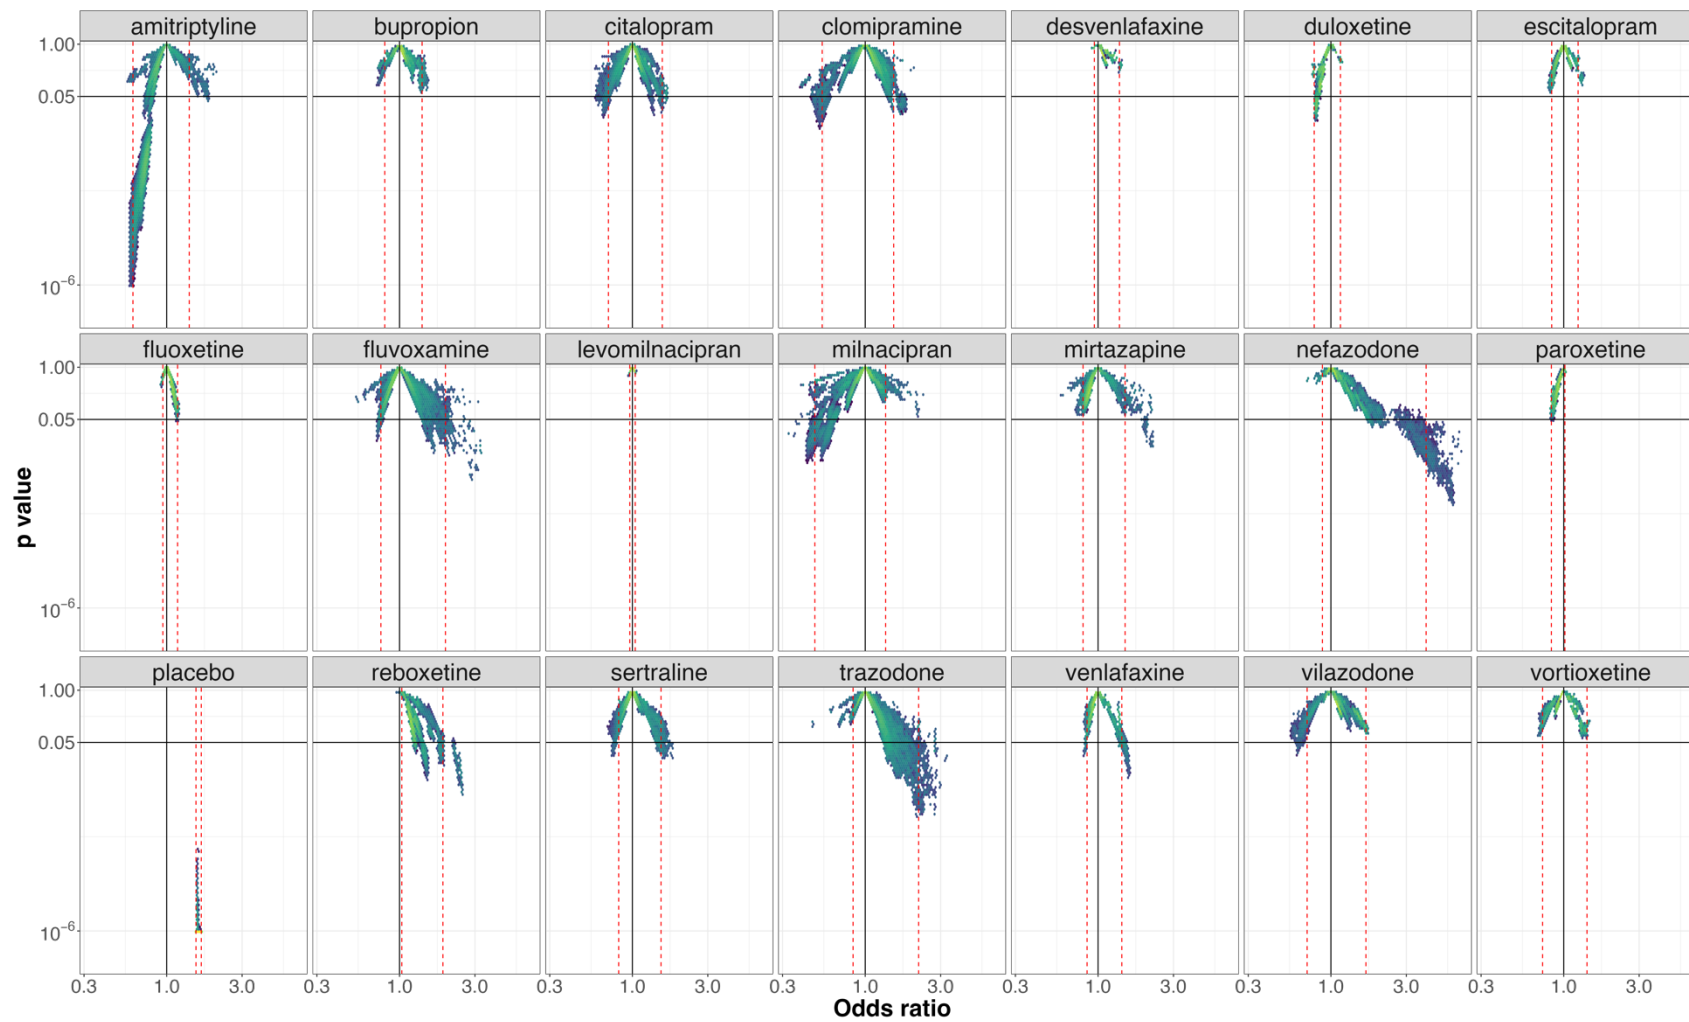

**e-figure 1:** *Vibration of effects for treatment response for the comparisons of agomelatine with the 20 remaining antidepressants and placebo (with the number of patients included in the most complete network for this comparison). An Odds ratio >1 favors agomelatine. The Colors indicate the log densities of network meta-analyses (yellow: high, green: moderate, blue: low) Dotted red lines illustrate the 1<sup>st</sup> and 99<sup>th</sup> percentiles.*

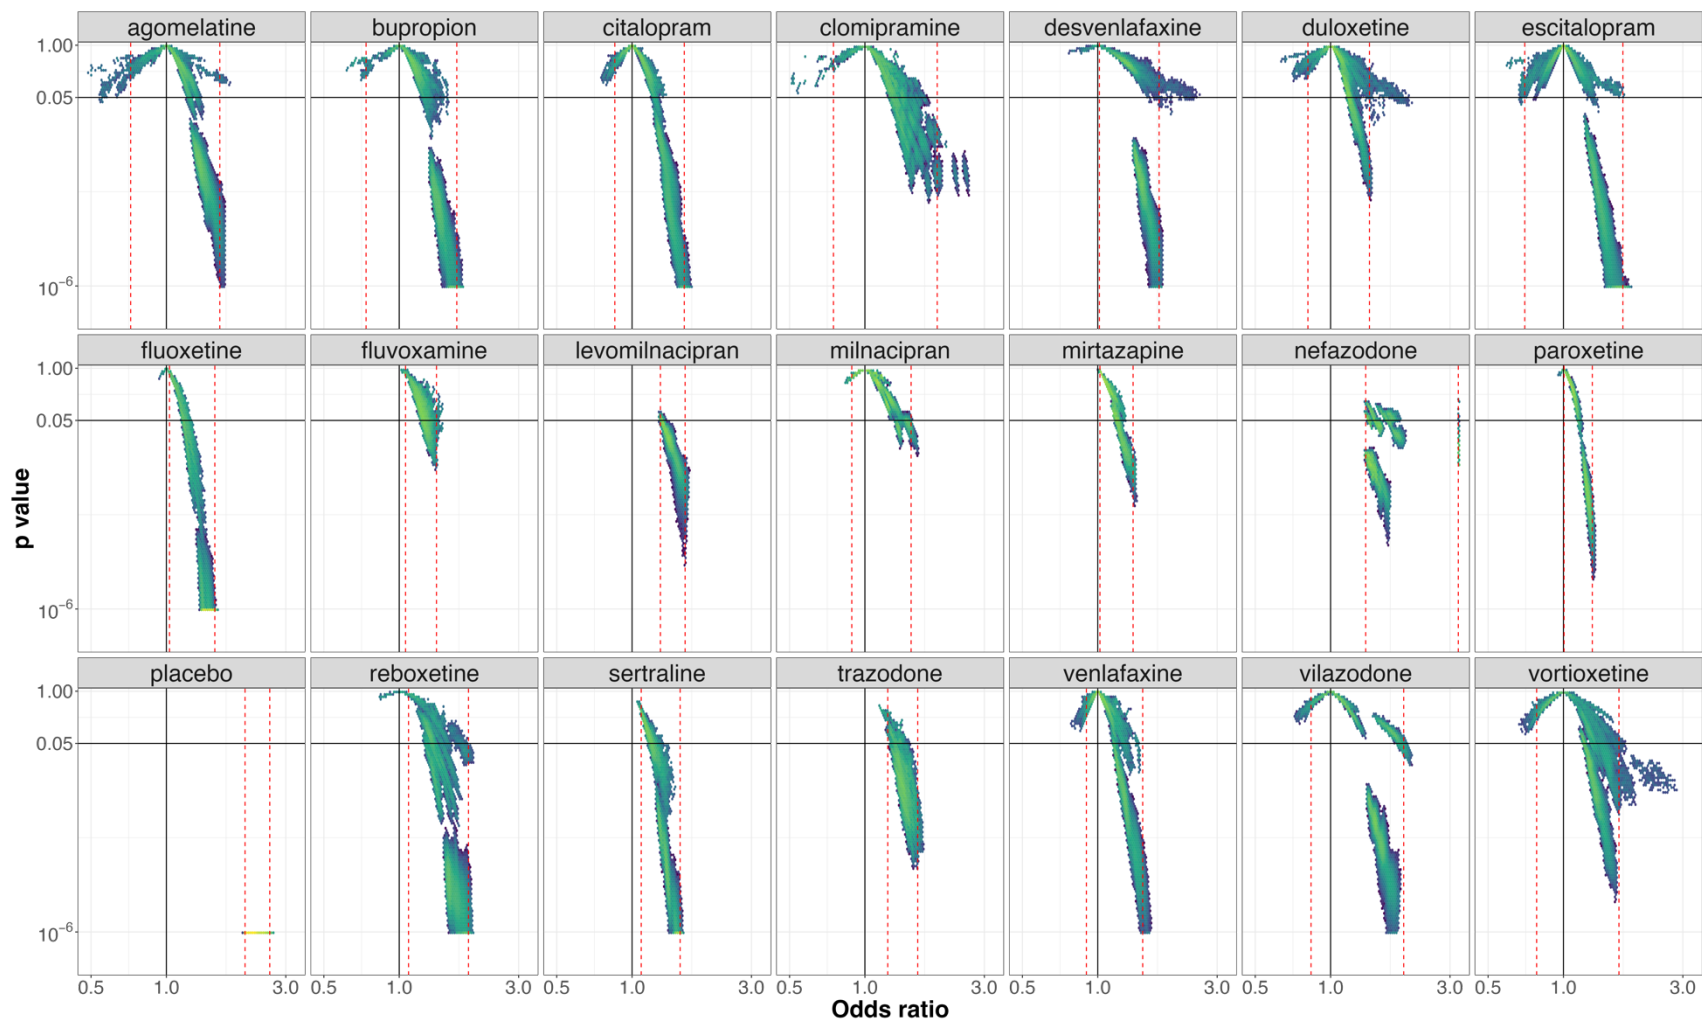

**e-figure 2:** *Vibration of effects for treatment response for the comparisons of amitriptyline with the 20 remaining antidepressants and placebo (with the number of patients included in the most complete network for this comparison). An Odds ratio >1 favors amitriptyline. The Colors indicate the log densities of network meta-analyses (yellow: high, green: moderate, blue: low) Dotted red lines illustrate the 1<sup>st</sup> and 99<sup>th</sup> percentiles.*

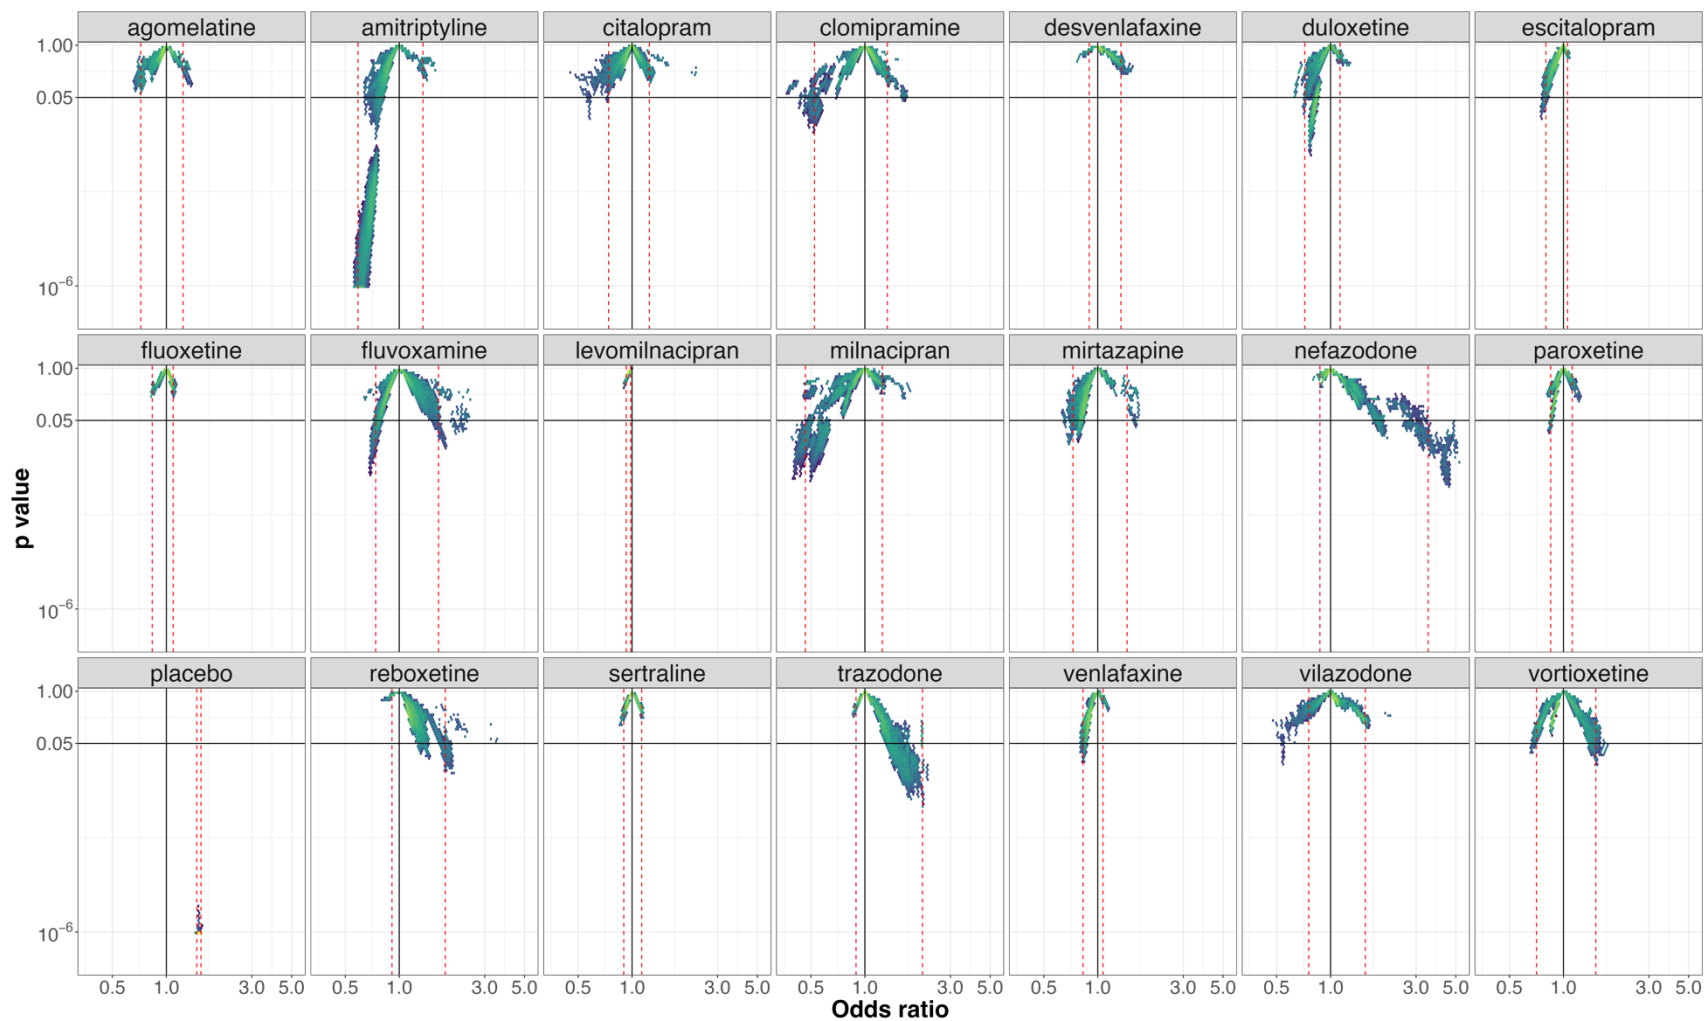

**e-figure 3:** *Vibration of effects for treatment response for the comparisons of bupropion with the 20 remaining antidepressants and placebo (with the number of patients included in the most complete network for this comparison). An Odds ratio >1 favors bupropion. The Colors indicate the log densities of network meta-analyses (yellow: high, green: moderate, blue: low) Dotted red lines illustrate the 1<sup>st</sup> and 99<sup>th</sup> percentiles.*

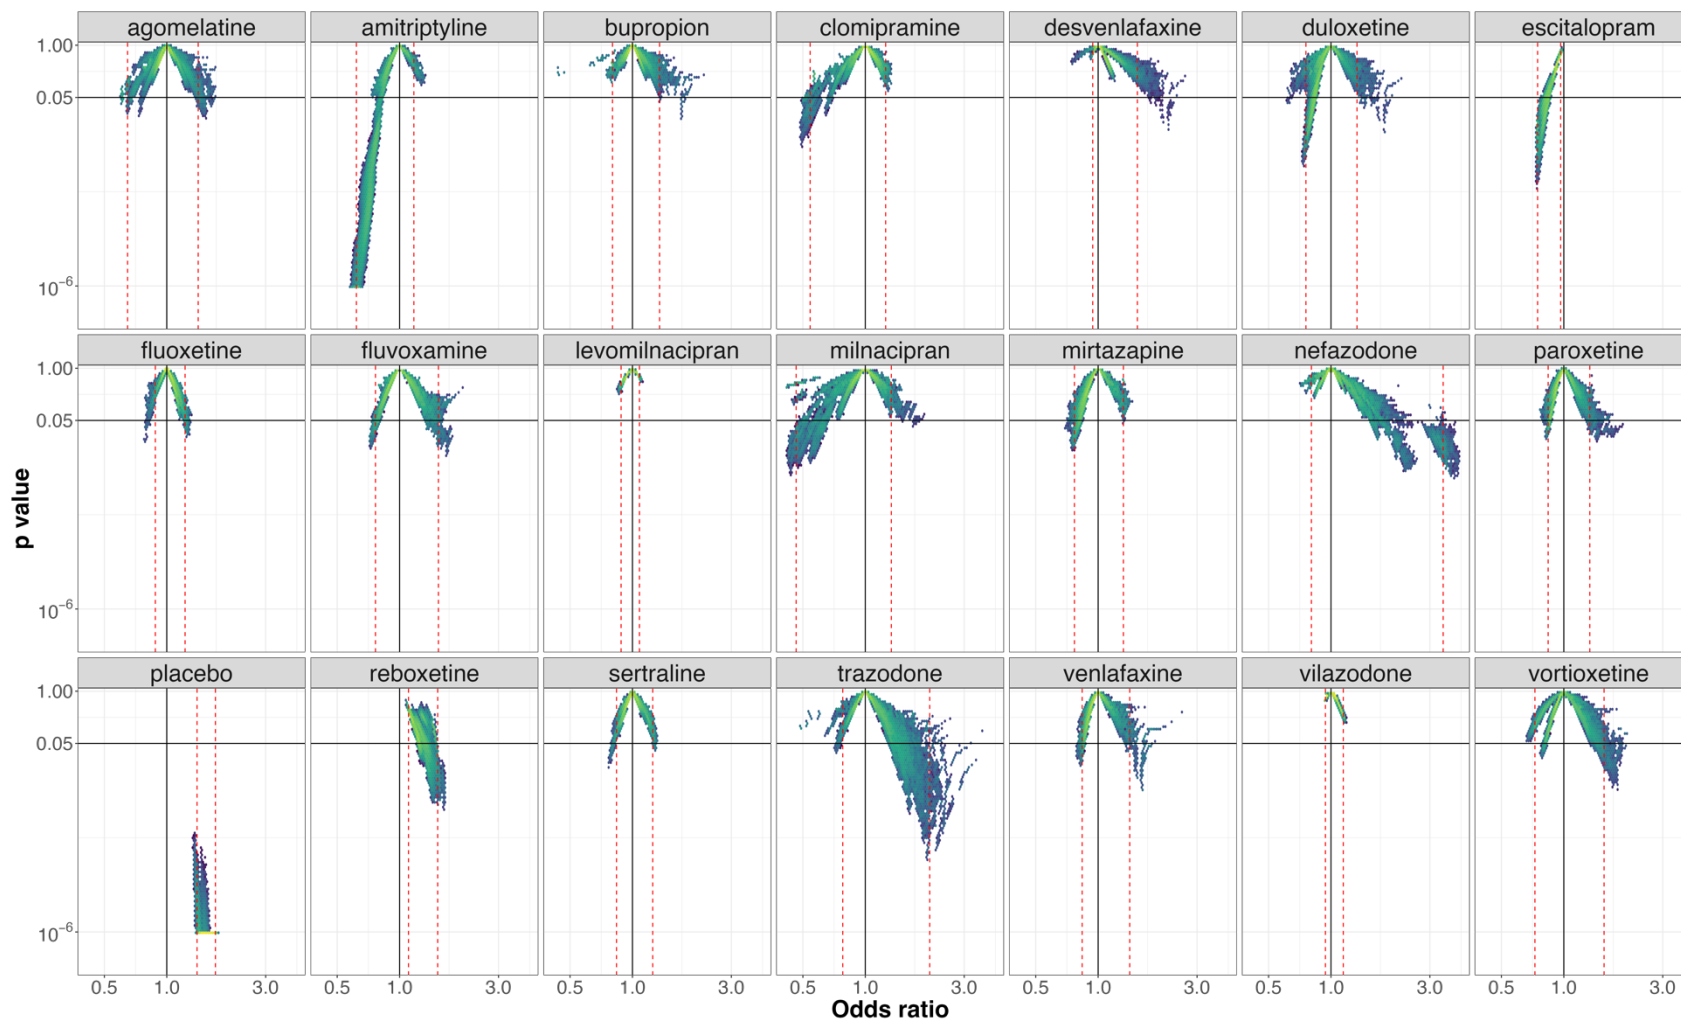

**e-figure 4:** *Vibration of effects for treatment response for the comparisons of citalopram with the 20 remaining antidepressants and placebo (with the number of patients included in the most complete network for this comparison). An Odds ratio >1 favors citalopram. The Colors indicate the log densities of network meta-analyses (yellow: high, green: moderate, blue: low) Dotted red lines illustrate the 1<sup>st</sup> and 99<sup>th</sup> percentiles.*

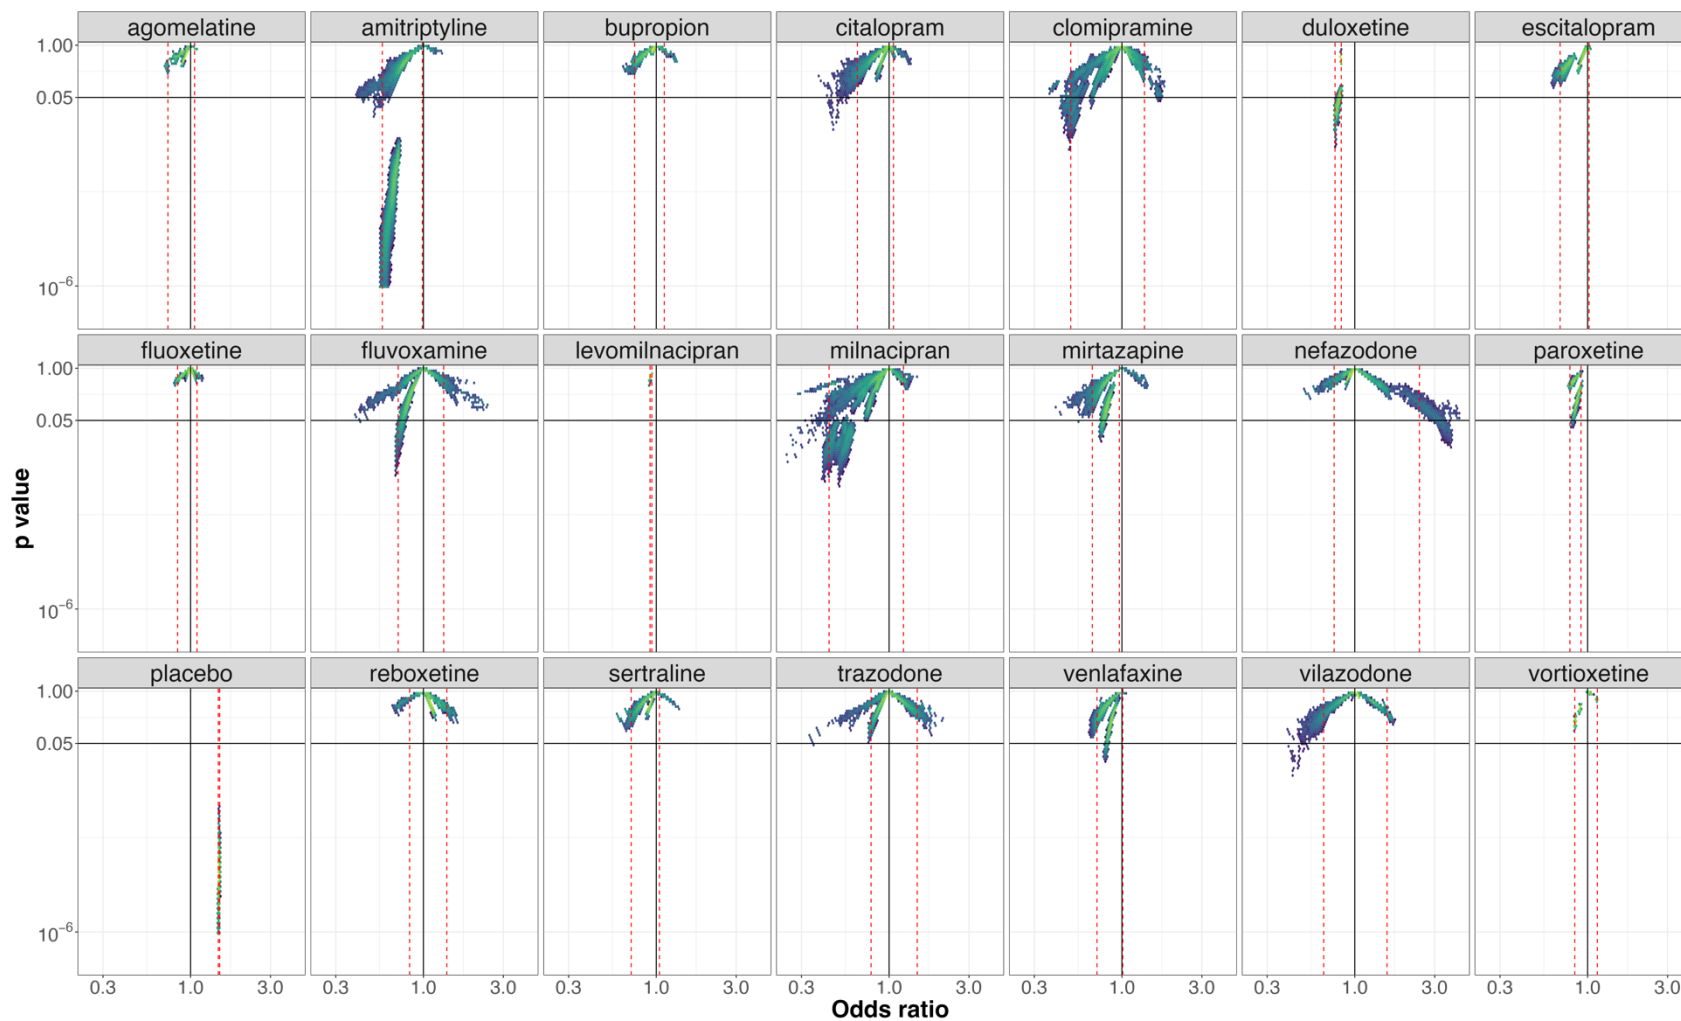

**e-figure 5:** *Vibration of effects for treatment response for the comparisons of desvenlafaxine with the 20 remaining antidepressants and placebo (with the number of patients included in the most complete network for this comparison). An Odds ratio >1 favors desvenlafaxine. The Colors indicate the log densities of network meta-analyses (yellow: high, green: moderate, blue: low) Dotted red lines illustrate the 1<sup>st</sup> and 99<sup>th</sup> percentiles.*

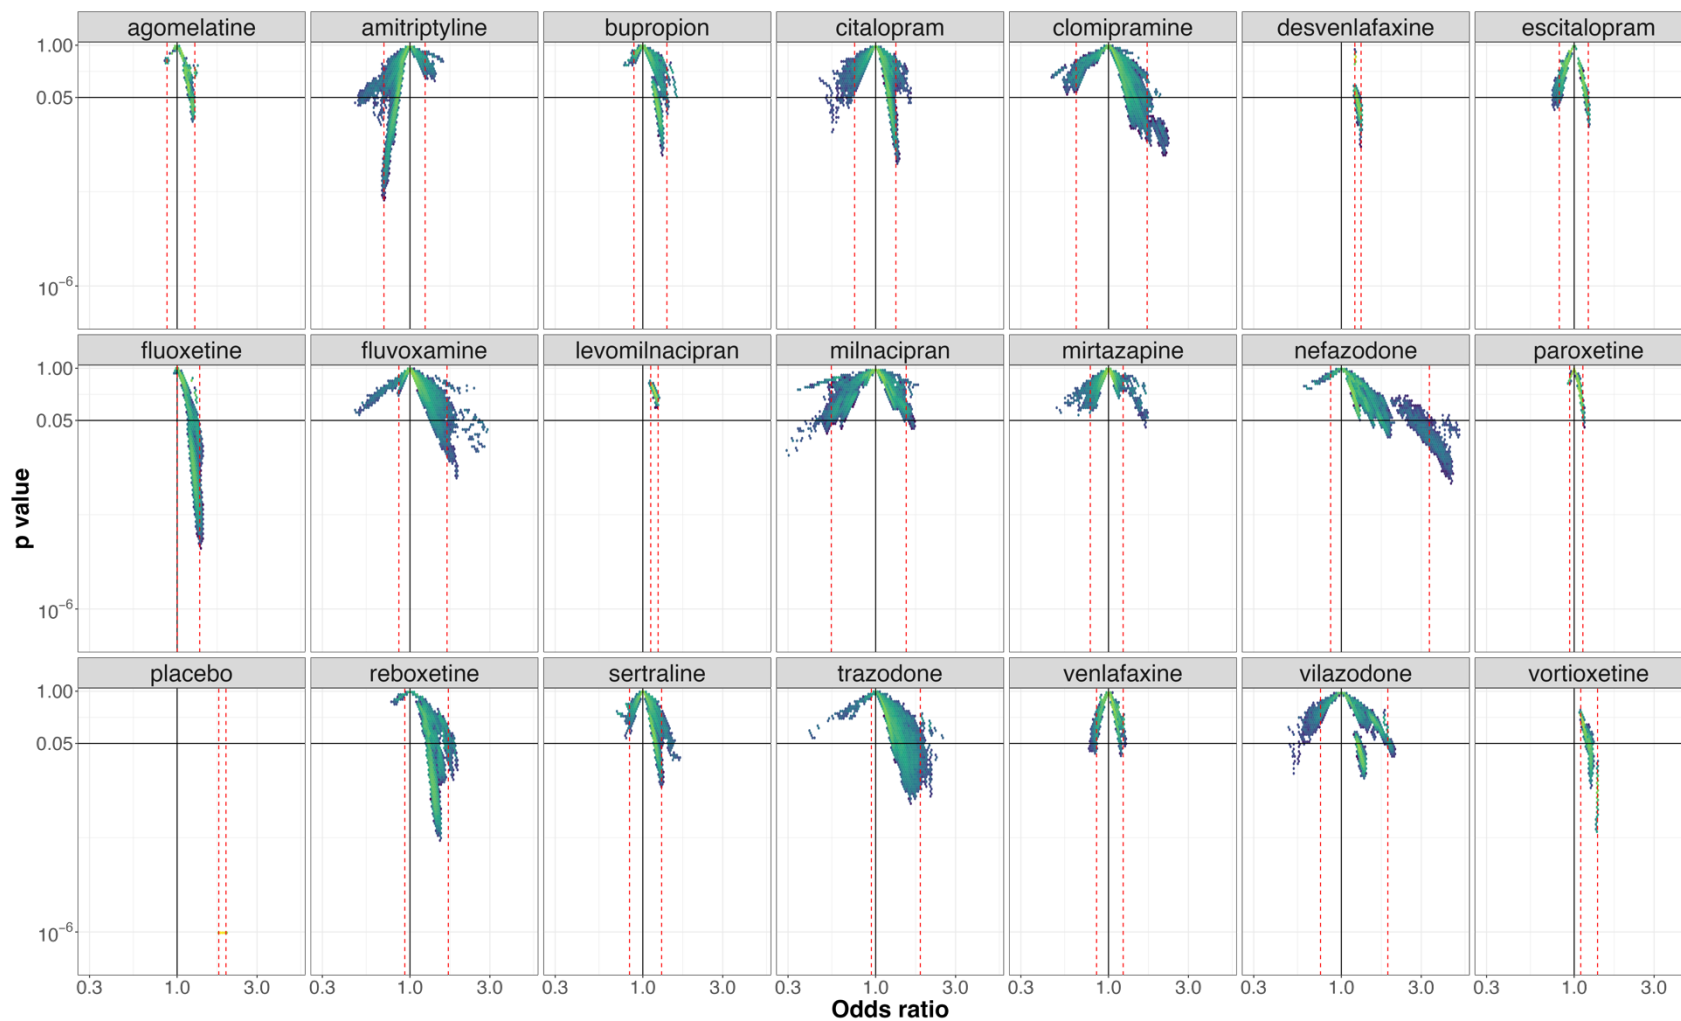



**e-figure 6:** *Vibration of effects for treatment response for the comparisons of duloxetine with the 20 remaining antidepressants and placebo (with the number of patients included in the most complete network for this comparison). An Odds ratio >1 favors duloxetine. The Colors indicate the log densities of network meta-analyses (yellow: high, green: moderate, blue: low) Dotted red lines illustrate the 1<sup>st</sup> and 99<sup>th</sup> percentiles.*

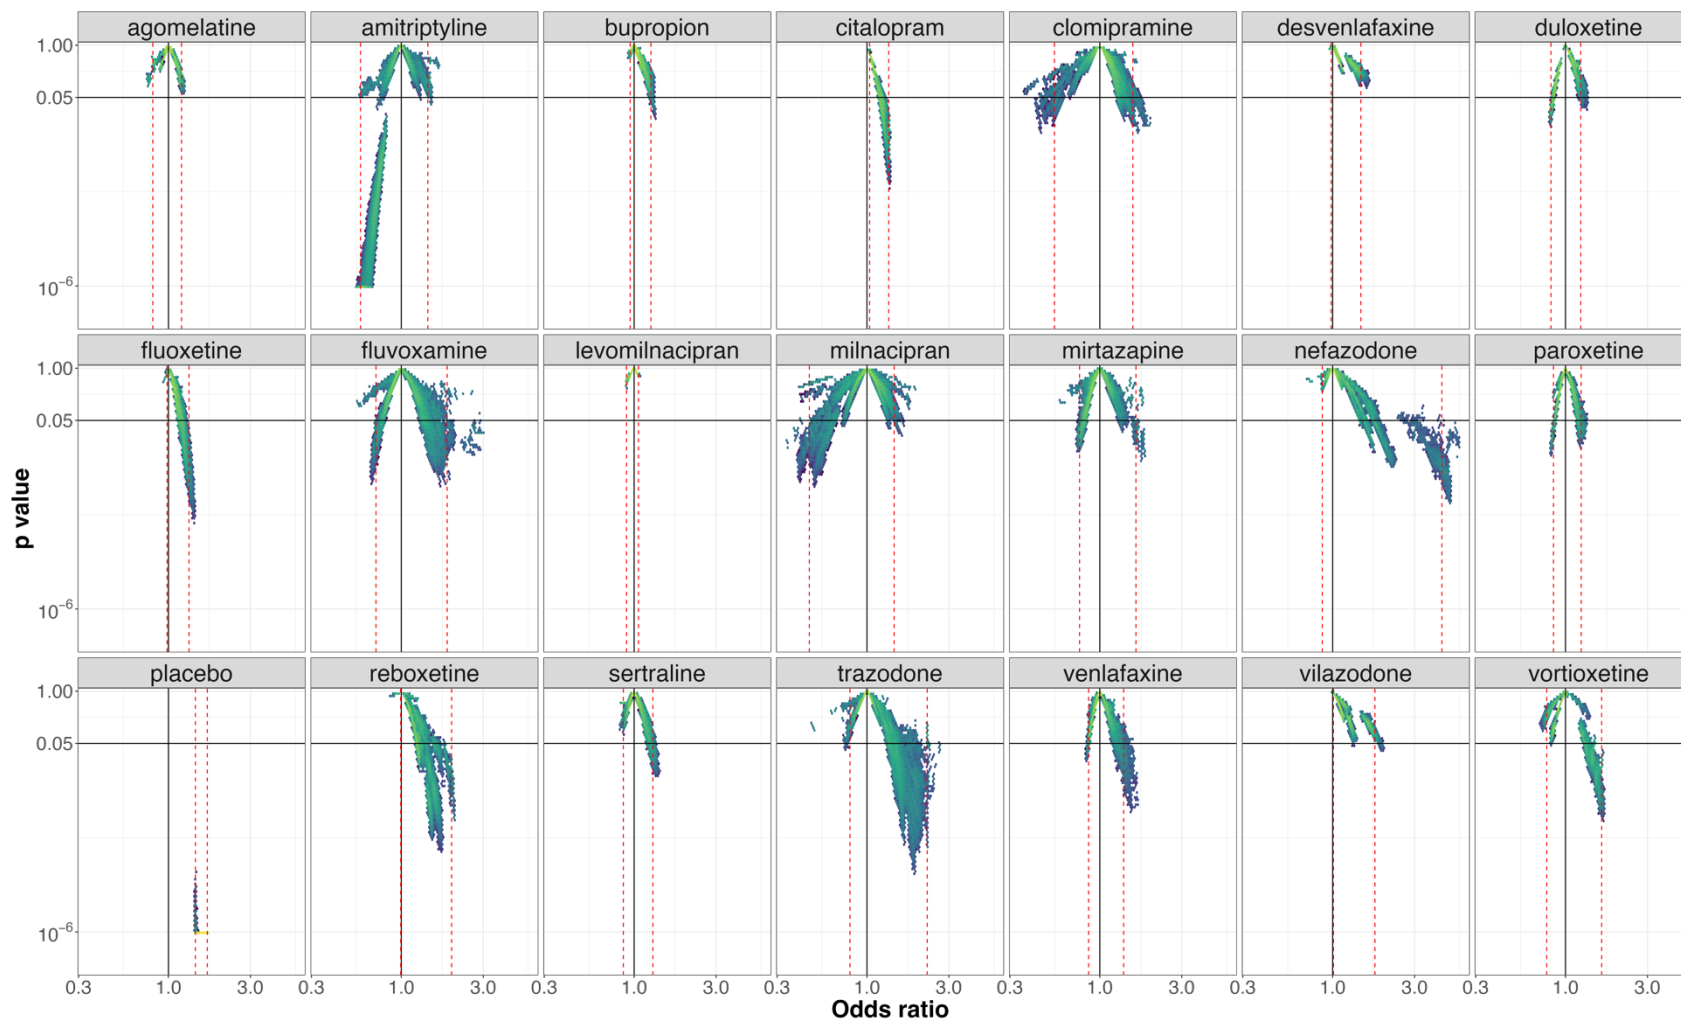

**e-figure 7:** *Vibration of effects for treatment response for the comparisons of escitalopram with the 20 remaining antidepressants and placebo (with the number of patients included in the most complete network for this comparison). An Odds ratio >1 favors escitalopram. The Colors indicate the log densities of network meta-analyses (yellow: high, green: moderate, blue: low) Dotted red lines illustrate the 1<sup>st</sup> and 99<sup>th</sup> percentiles.*

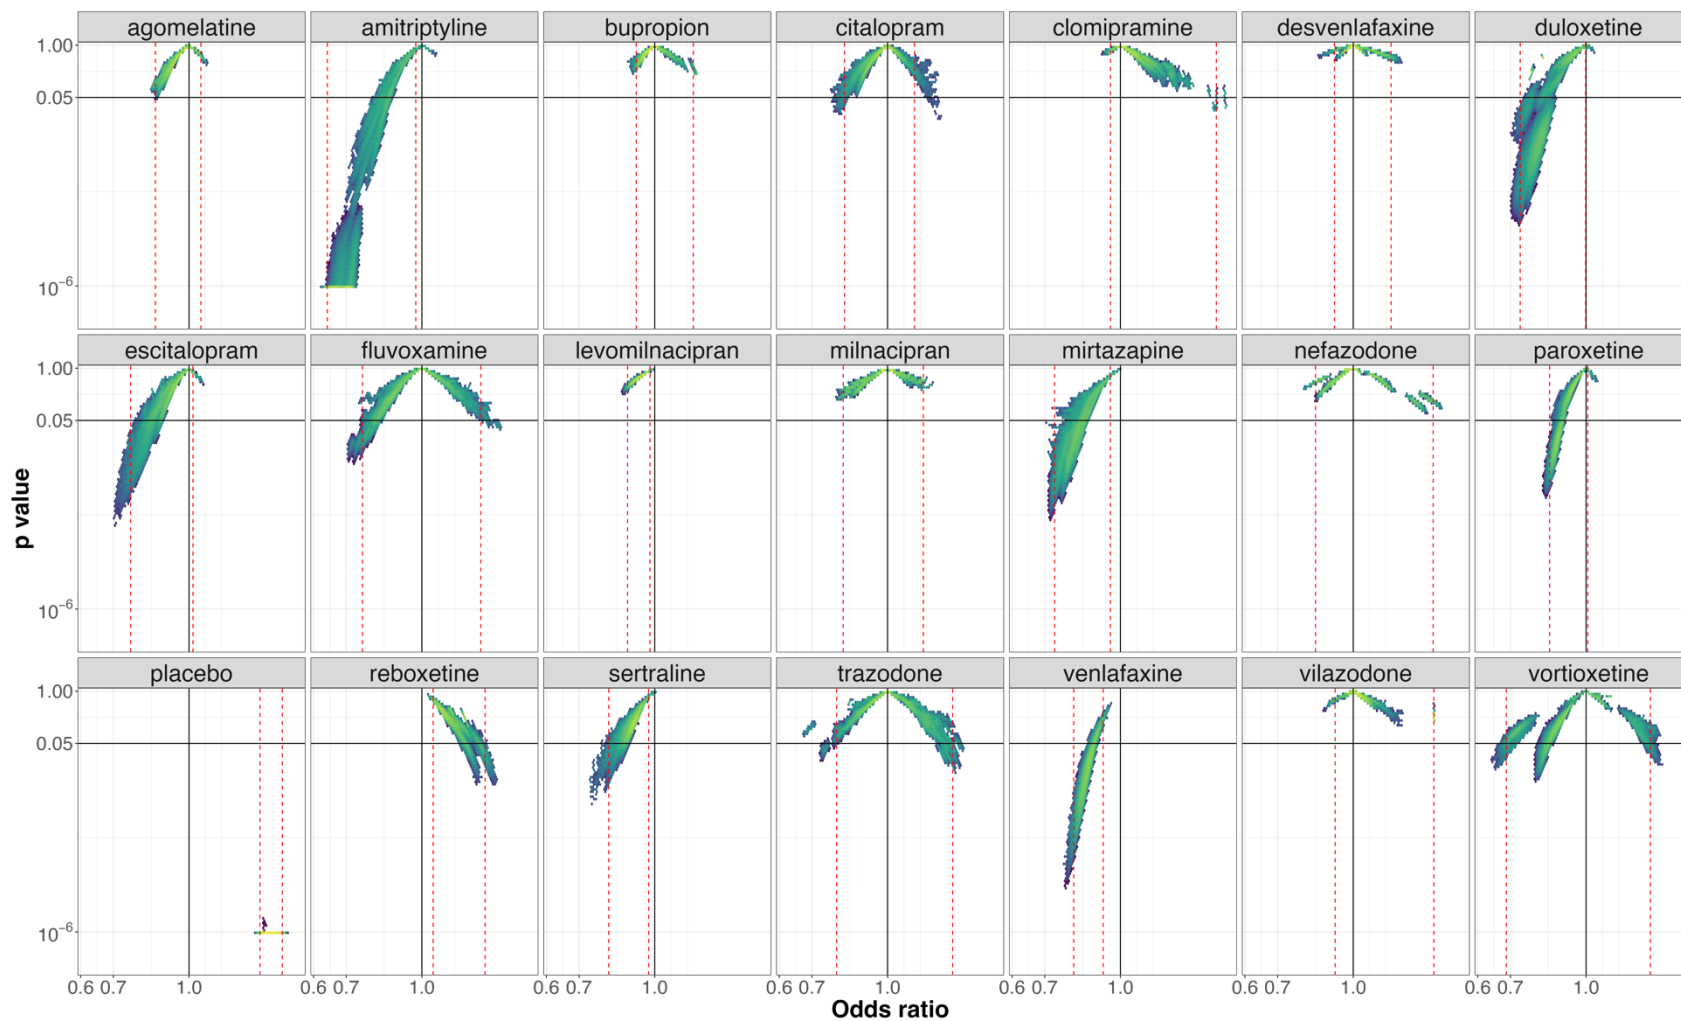

**e-figure 8:** *Vibration of effects for treatment response for the comparisons of fluoxetine with the 20 remaining antidepressants and placebo (with the number of patients included in the most complete network for this comparison). An Odds ratio >1 favors fluoxetine. The Colors indicate the log densities of network meta-analyses (yellow: high, green: moderate, blue: low) Dotted red lines illustrate the 1<sup>st</sup> and 99<sup>th</sup> percentiles.*

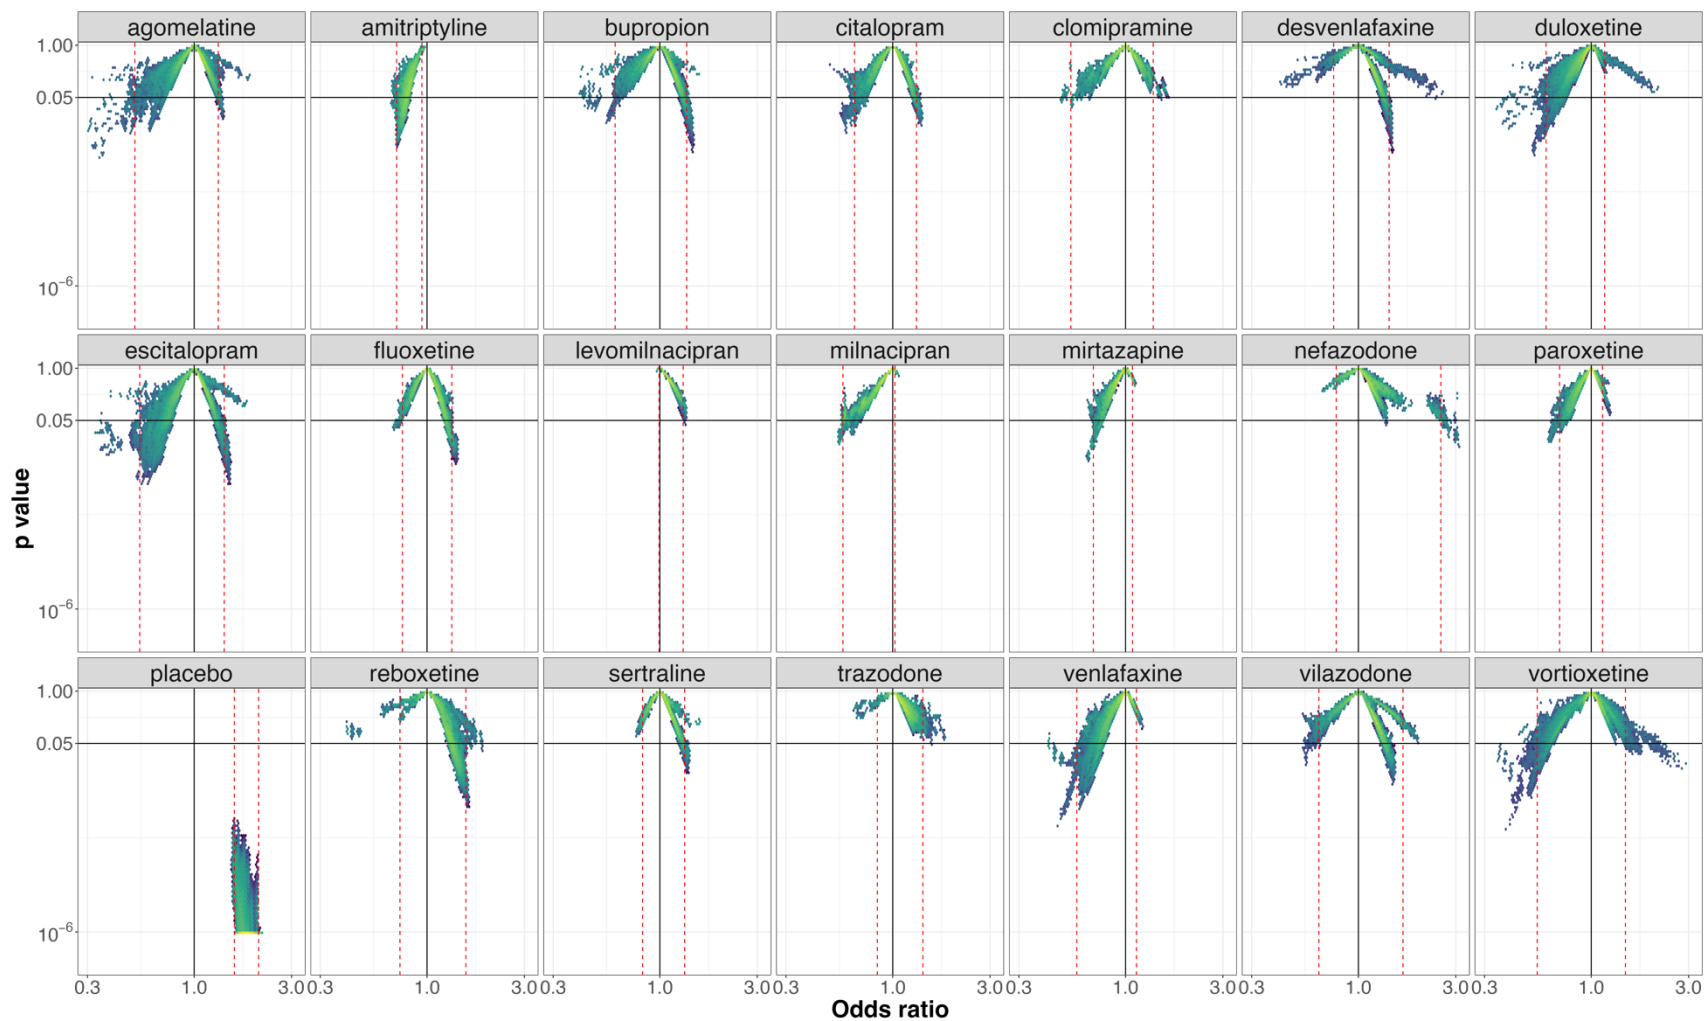

**e-figure 9:** *Vibration of effects for treatment response for the comparisons of fluvoxamine with the 20 remaining antidepressants and placebo (with the number of patients included in the most complete network for this comparison). An Odds ratio >1 favors fluvoxamine. The Colors indicate the log densities of network meta-analyses (yellow: high, green: moderate, blue: low) Dotted red lines illustrate the 1<sup>st</sup> and 99<sup>th</sup> percentiles.*

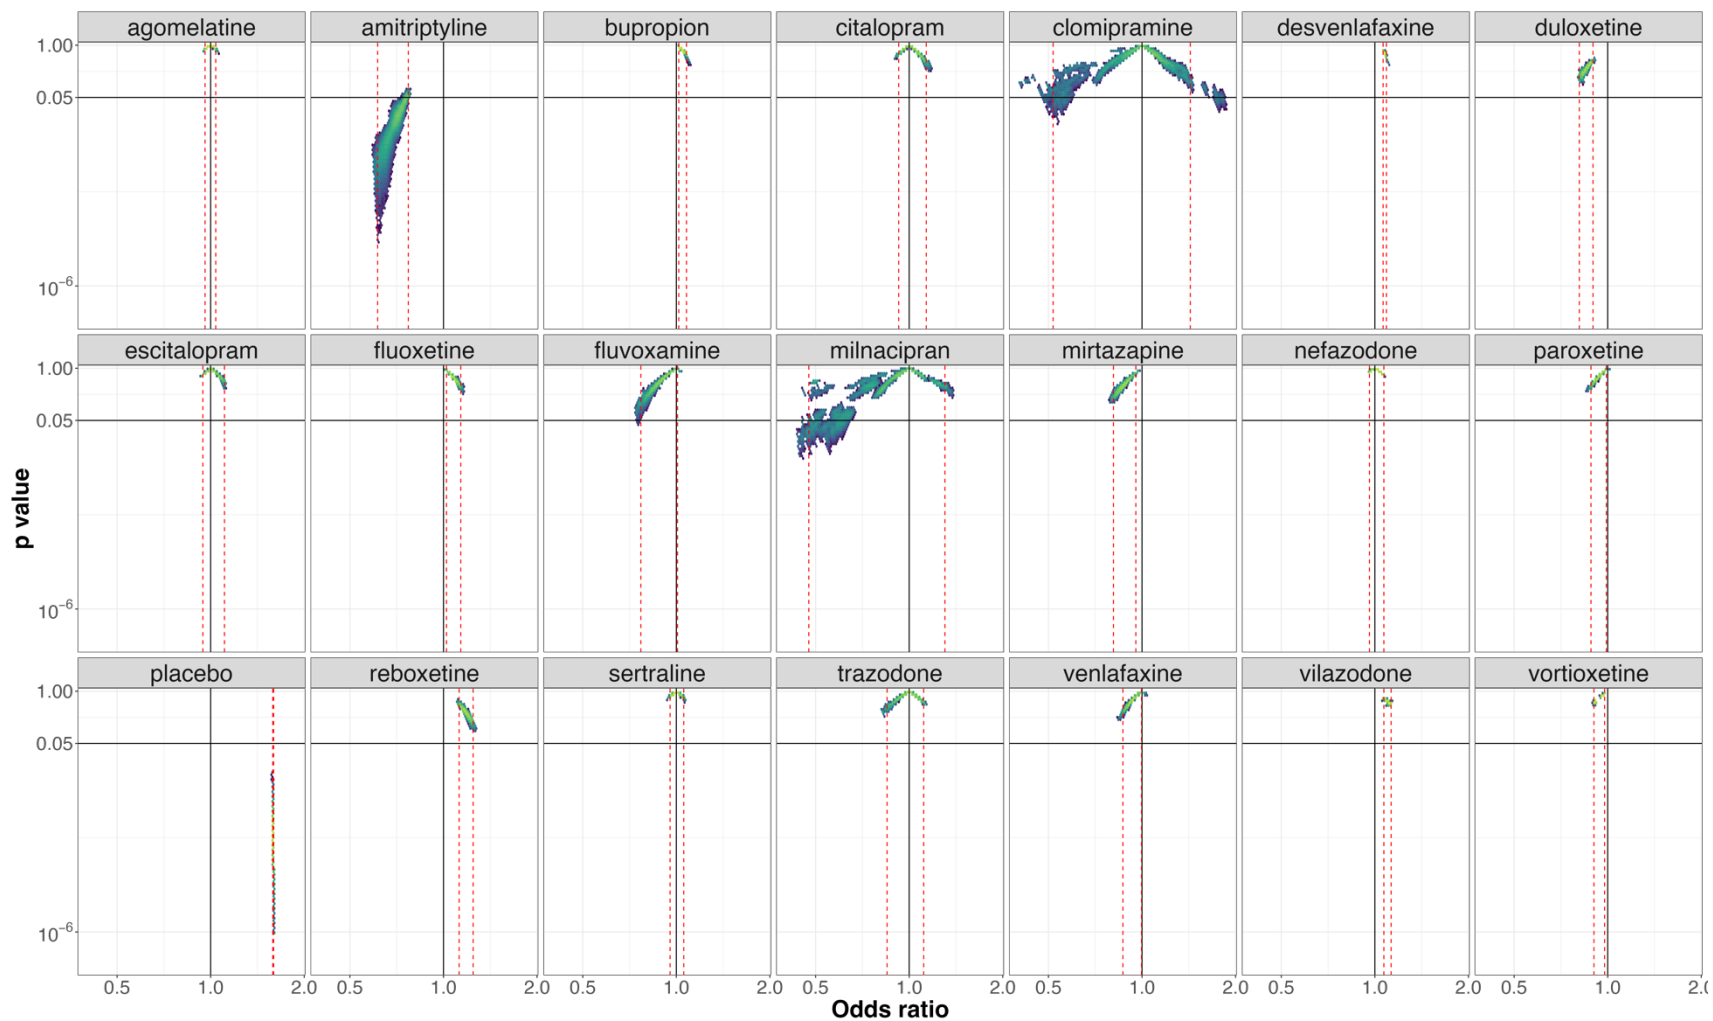

**e-figure 10:** *Vibration of effects for treatment response for the comparisons of levomilnacipran with the 20 remaining antidepressants and placebo (with the number of patients included in the most complete network for this comparison). An Odds ratio >1 favors levomilnacipran. The Colors indicate the log densities of network meta-analyses (yellow: high, green: moderate, blue: low) Dotted red lines illustrate the 1<sup>st</sup> and 99<sup>th</sup> percentiles.*

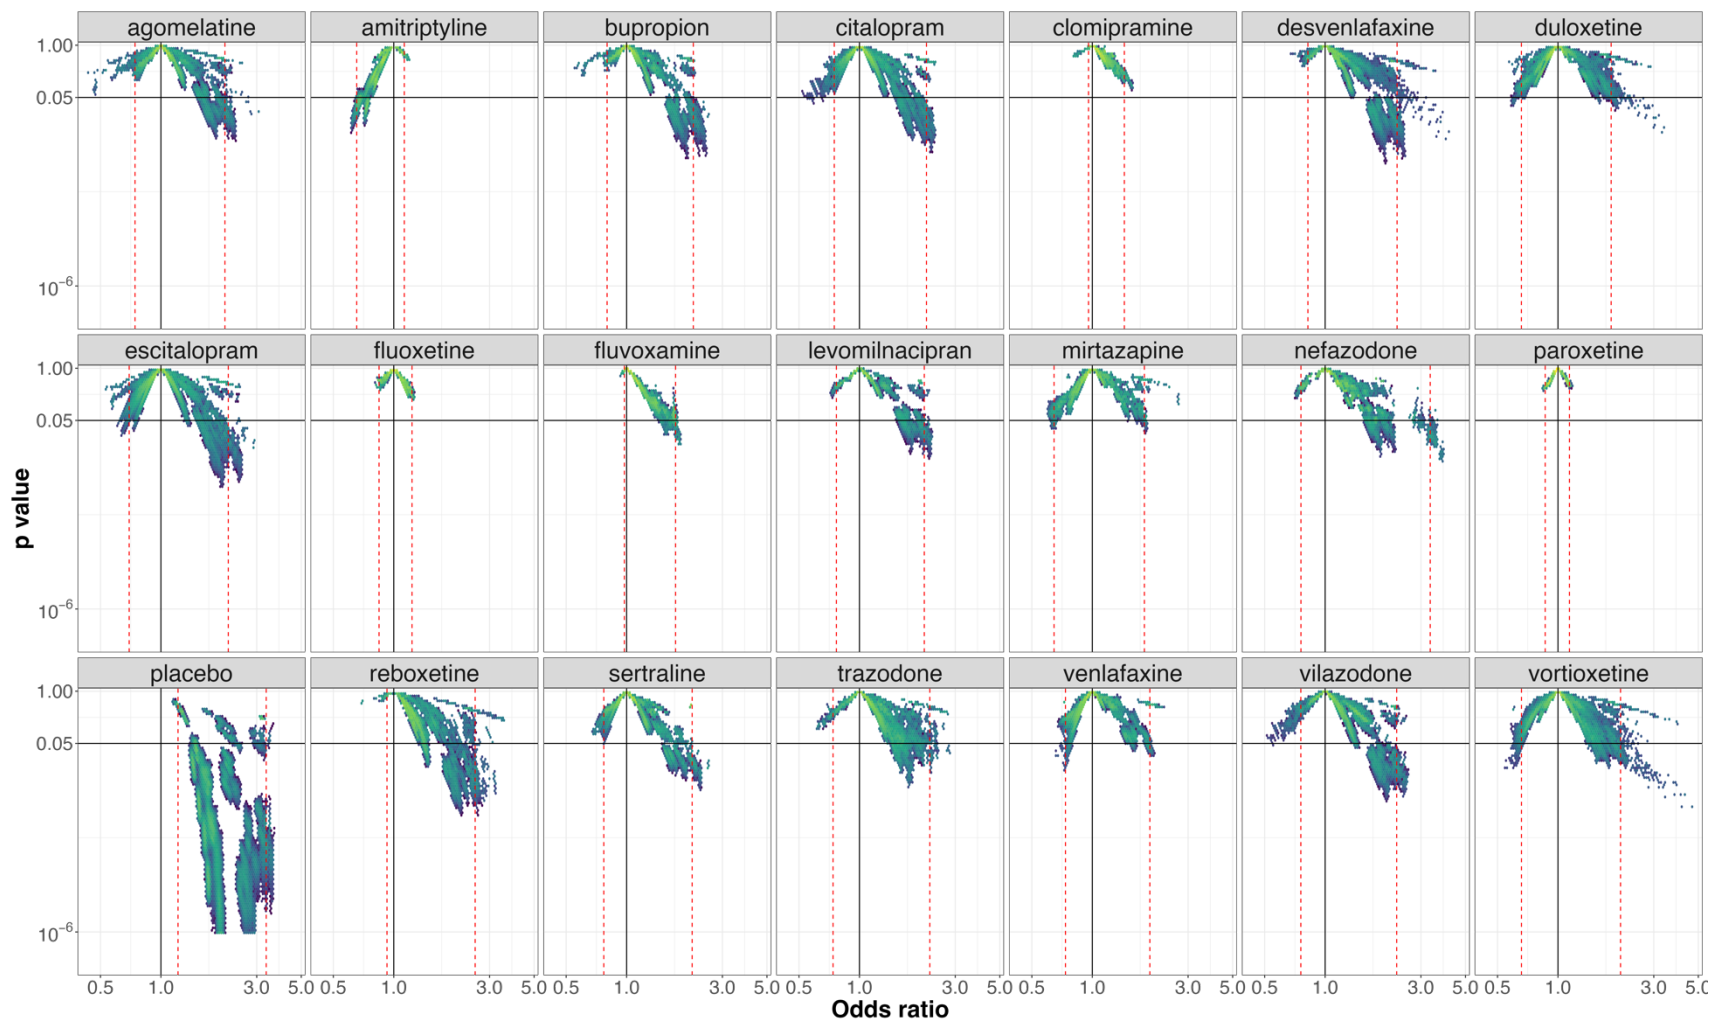

**e-figure 11:** *Vibration of effects for treatment response for the comparisons of milnacipran with the 20 remaining antidepressants and placebo (with the number of patients included in the most complete network for this comparison). An Odds ratio >1 favors milnacipran. The Colors indicate the log densities of network meta-analyses (yellow: high, green: moderate, blue: low) Dotted red lines illustrate the 1<sup>st</sup> and 99<sup>th</sup> percentiles.*

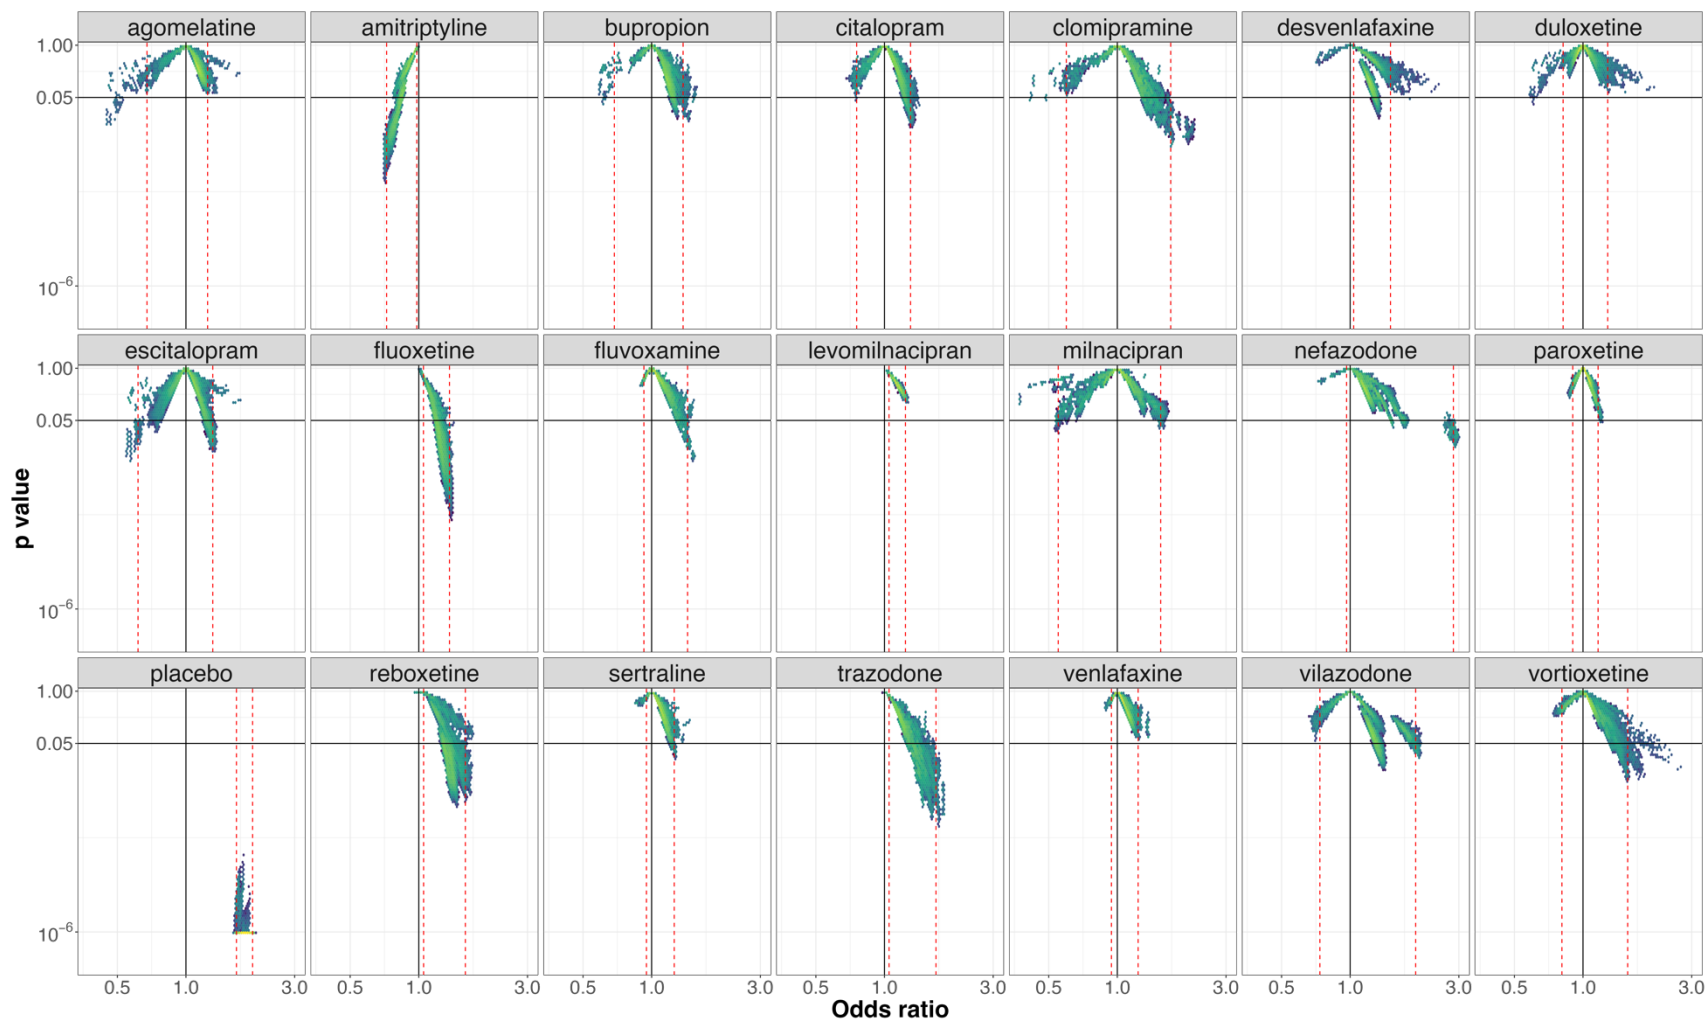

**e-figure 12:** *Vibration of effects for treatment response for the comparisons of mirtazapine with the 20 remaining antidepressants and placebo (with the number of patients included in the most complete network for this comparison). An Odds ratio >1 favors mirtazapine. The Colors indicate the log densities of network meta-analyses (yellow: high, green: moderate, blue: low) Dotted red lines illustrate the 1<sup>st</sup> and 99<sup>th</sup> percentiles.*

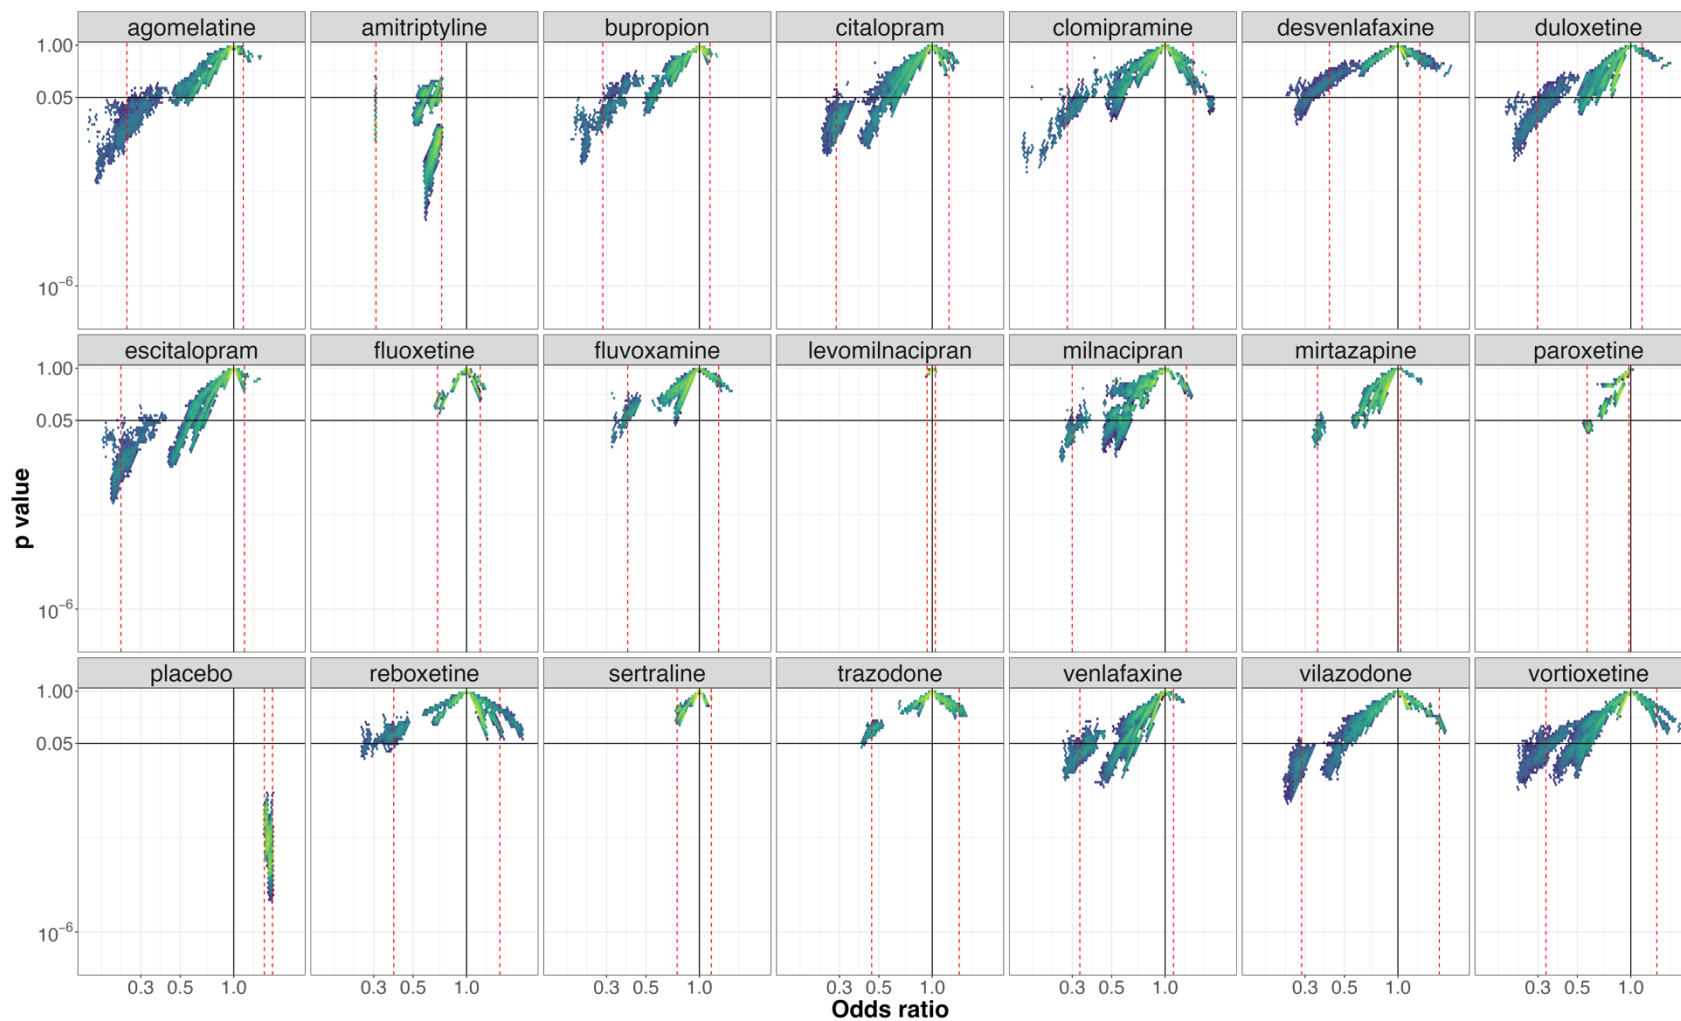

**e-figure 13:** *Vibration of effects for treatment response for the comparisons of nefazodone with the 20 remaining antidepressants and placebo (with the number of patients included in the most complete network for this comparison). An Odds ratio >1 favors nefazodone. The Colors indicate the log densities of network meta-analyses (yellow: high, green: moderate, blue: low) Dotted red lines illustrate the 1<sup>st</sup> and 99<sup>th</sup> percentiles.*

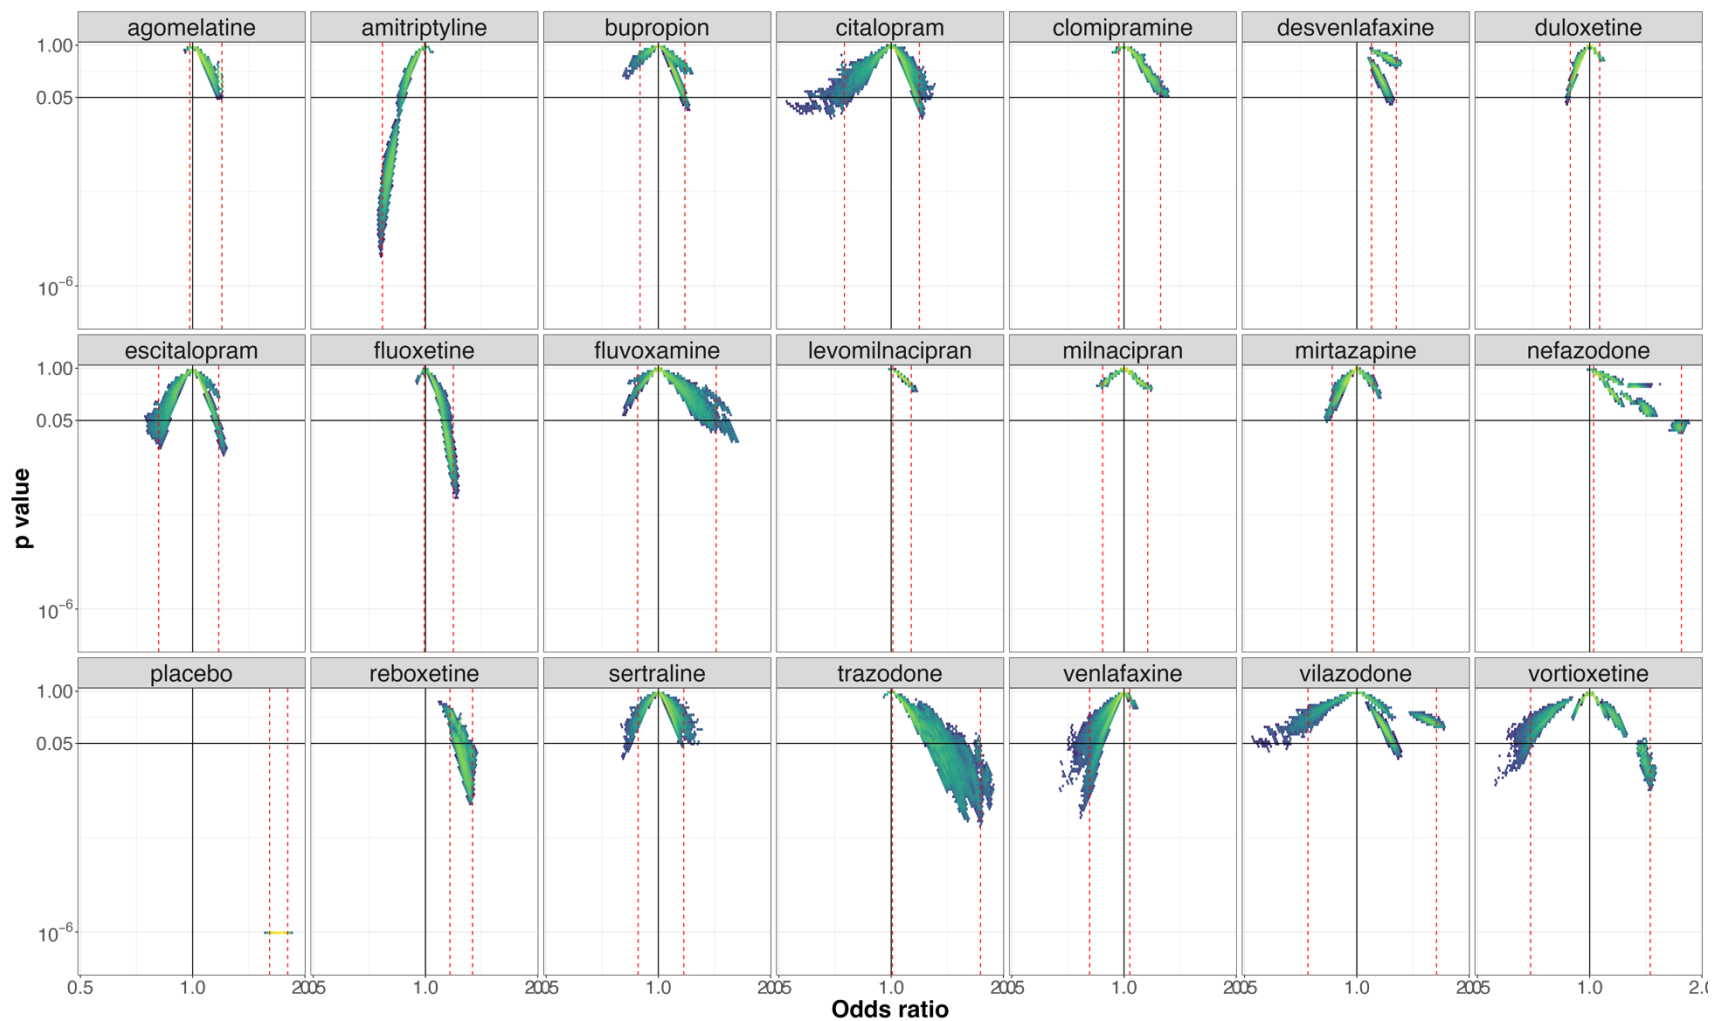



**e-figure 14:** *Vibration of effects for treatment response for the comparisons of paroxetine with the 20 remaining antidepressants and placebo (with the number of patients included in the most complete network for this comparison). An Odds ratio >1 favors paroxetine. The Colors indicate the log densities of network meta-analyses (yellow: high, green: moderate, blue: low) Dotted red lines illustrate the 1<sup>st</sup> and 99<sup>th</sup> percentiles.*

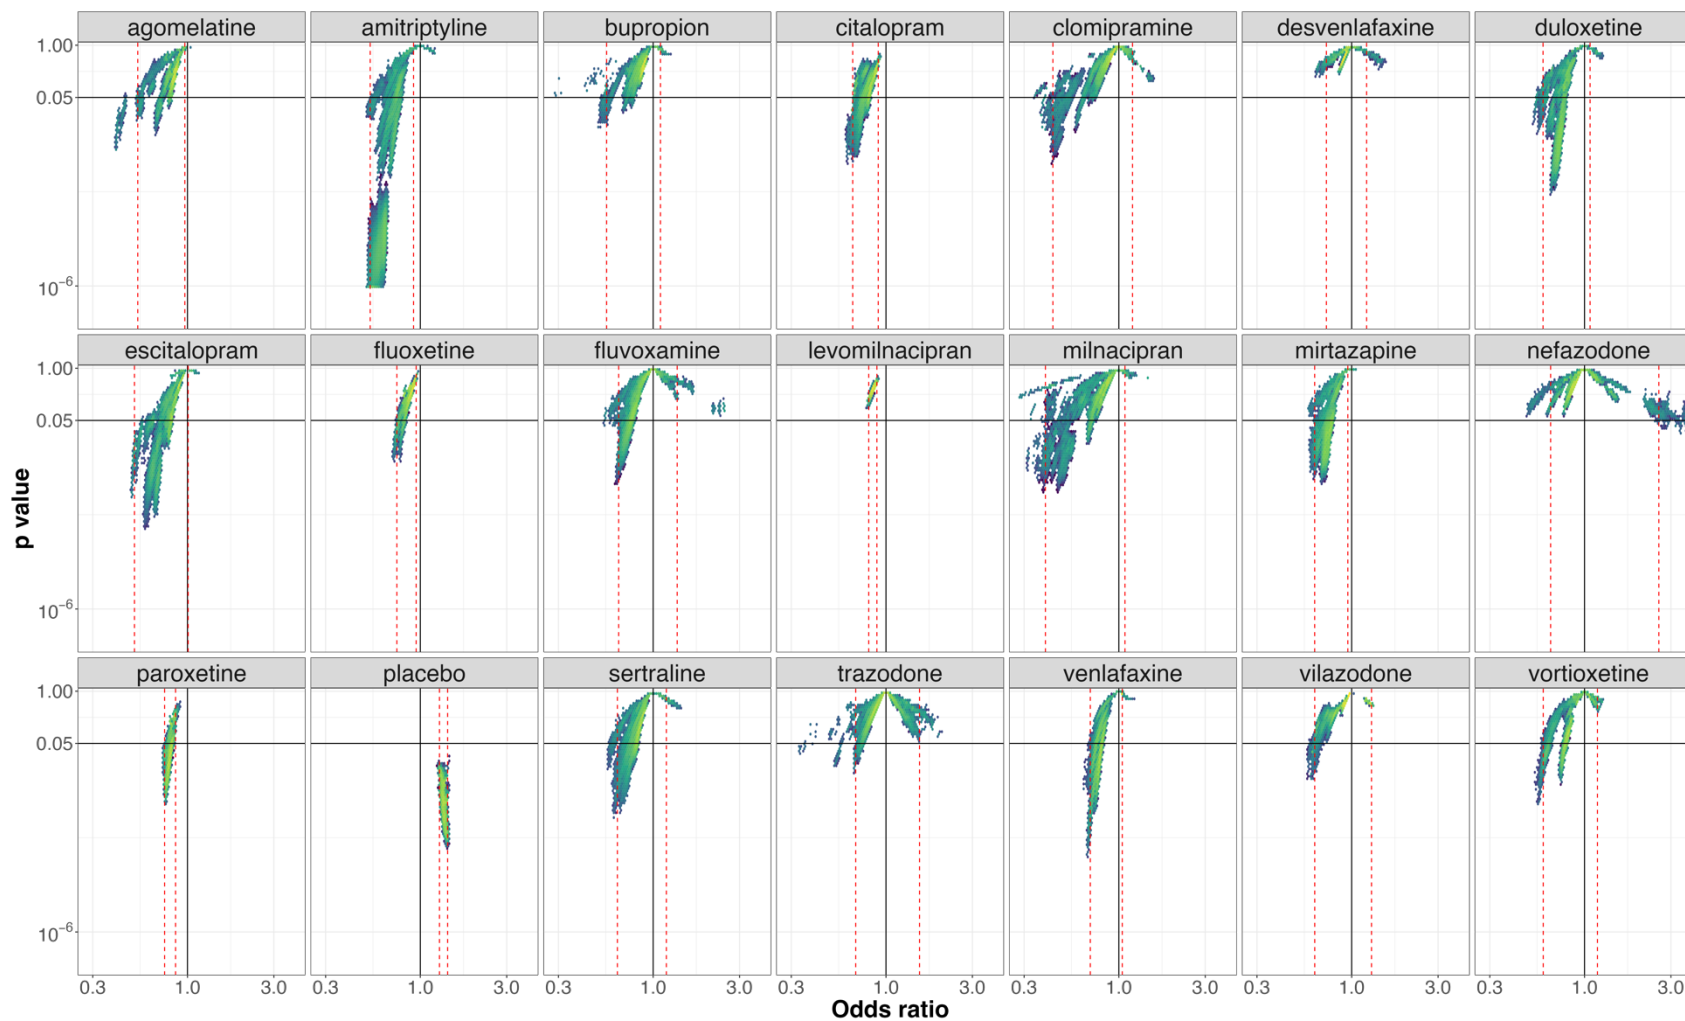

**e-figure 15:** *Vibration of effects for treatment response for the comparisons of reboxetine with the 20 remaining antidepressants and placebo (with the number of patients included in the most complete network for this comparison). An Odds ratio >1 favors reboxetine. The Colors indicate the log densities of network meta-analyses (yellow: high, green: moderate, blue: low) Dotted red lines illustrate the 1<sup>st</sup> and 99<sup>th</sup> percentiles.*

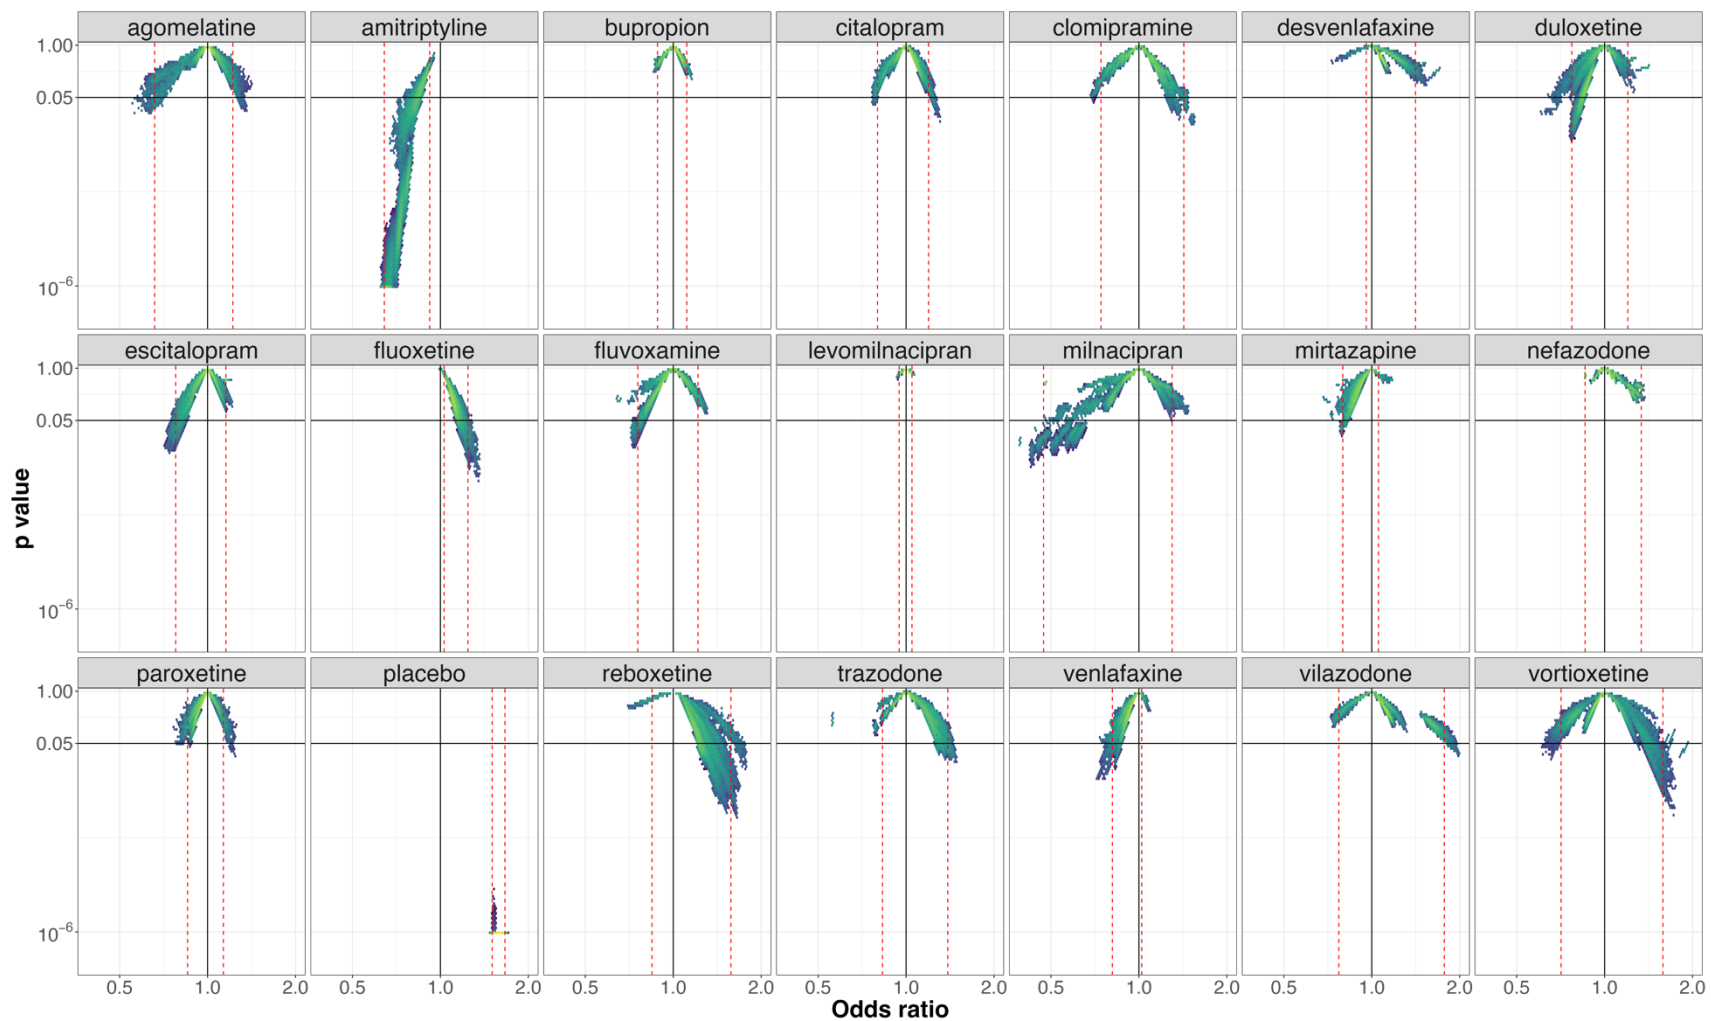

**e-figure 16:** *Vibration of effects for treatment response for the comparisons of sertraline with the 20 remaining antidepressants and placebo (with the number of patients included in the most complete network for this comparison). An Odds ratio >1 favors clomipramine. The Colors indicate the log densities of network meta-analyses (yellow: high, green: moderate, blue: low) Dotted red lines illustrate the 1<sup>st</sup> and 99<sup>th</sup> percentiles.*

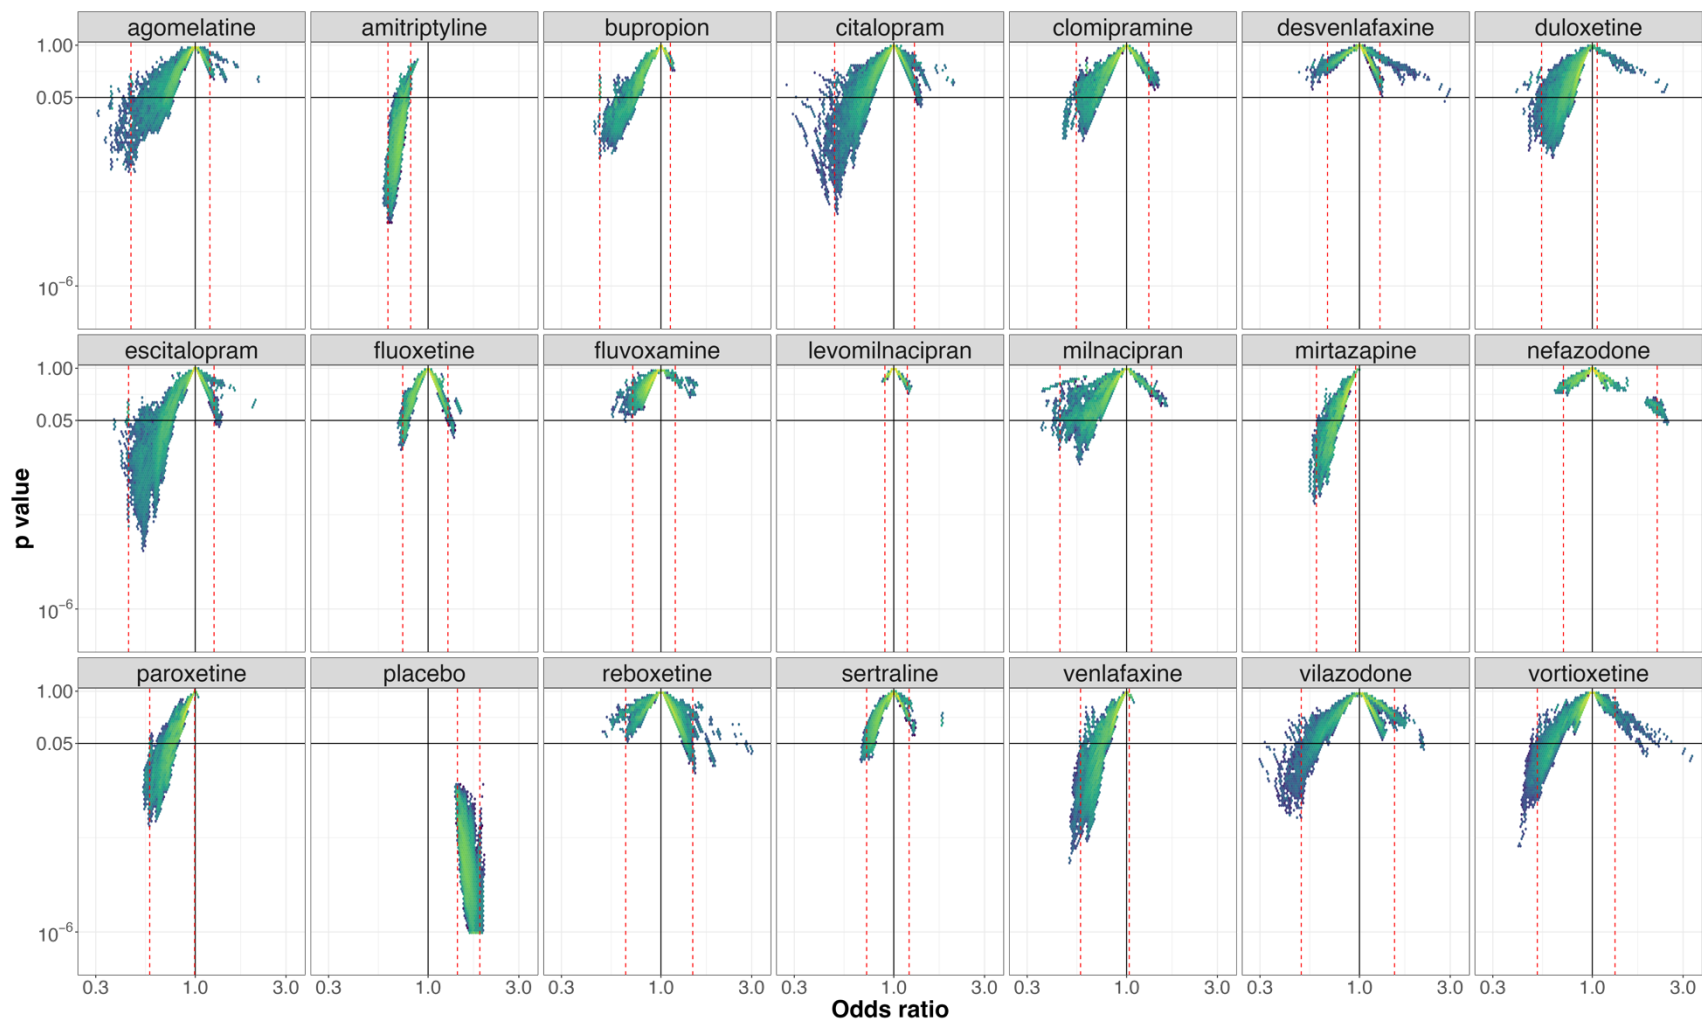

**e-figure 17:** *Vibration of effects for treatment response for the comparisons of trazodone with the 20 remaining antidepressants and placebo (with the number of patients included in the most complete network for this comparison). An Odds ratio >1 favors trazodone. The Colors indicate the log densities of network meta-analyses (yellow: high, green: moderate, blue: low) Dotted red lines illustrate the 1<sup>st</sup> and 99<sup>th</sup> percentiles.*

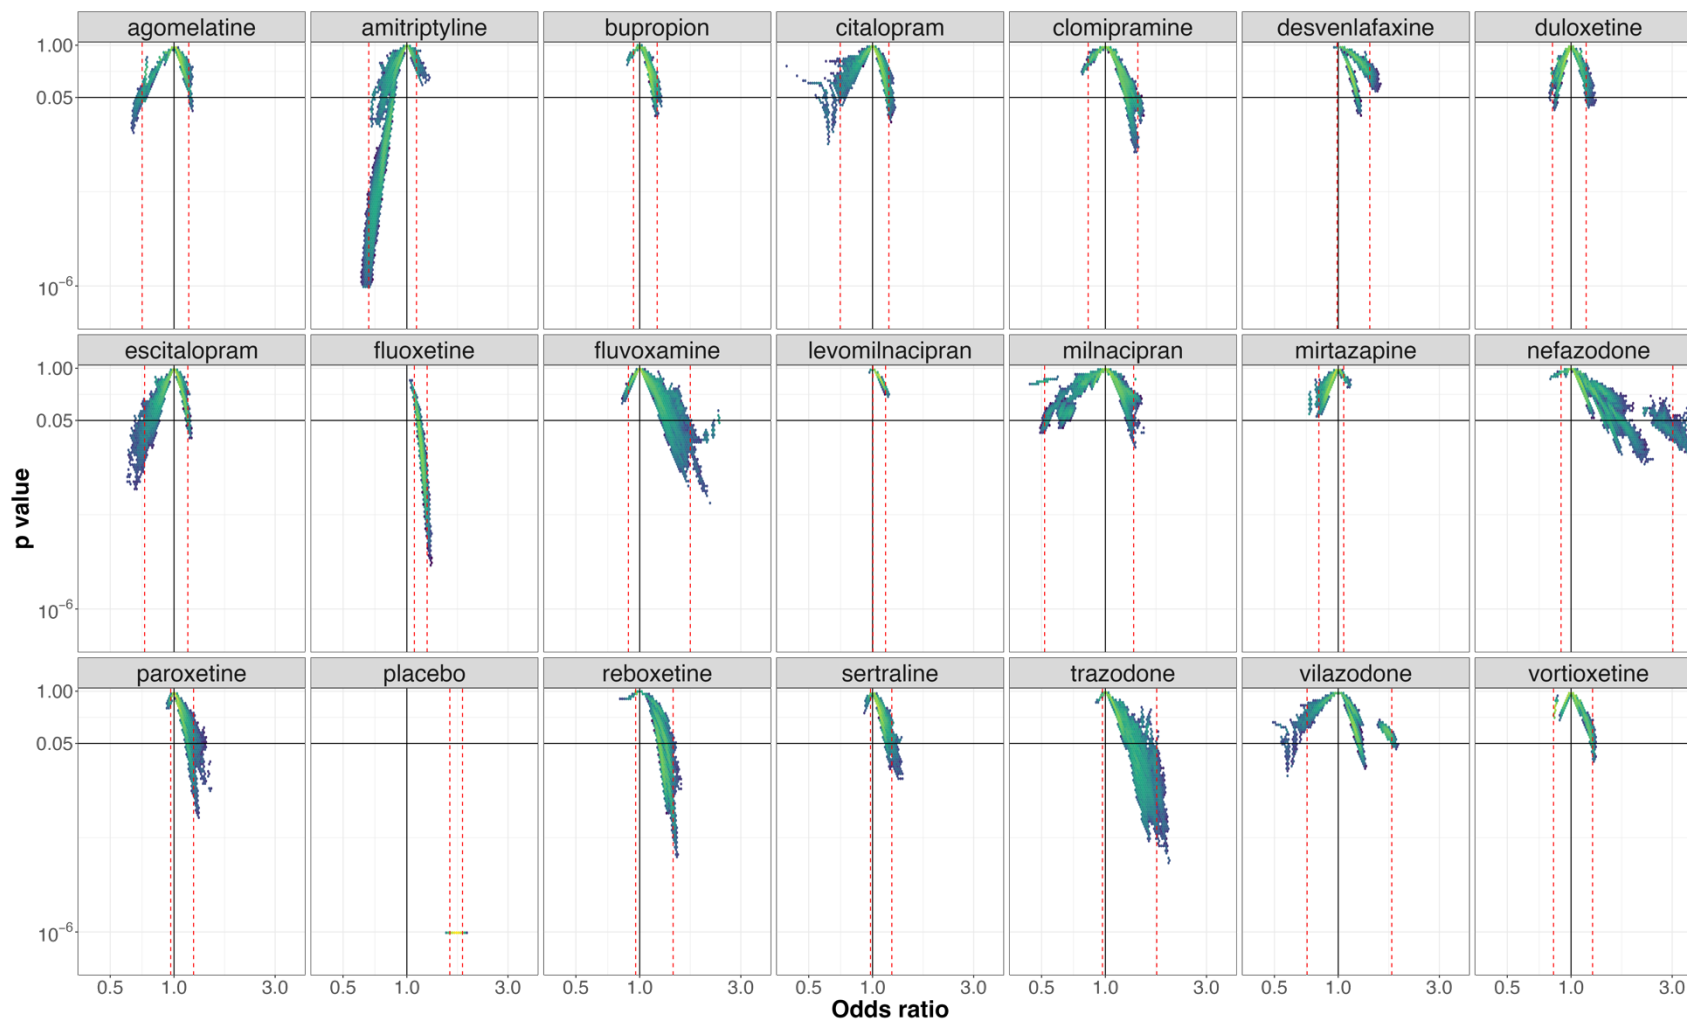

**e-figure 18:** *Vibration of effects for treatment response for the comparisons of venlafaxine with the 20 remaining antidepressants and placebo (with the number of patients included in the most complete network for this comparison). An Odds ratio >1 favors venlafaxine. The Colors indicate the log densities of network meta-analyses (yellow: high, green: moderate, blue: low) Dotted red lines illustrate the 1<sup>st</sup> and 99<sup>th</sup> percentiles.*

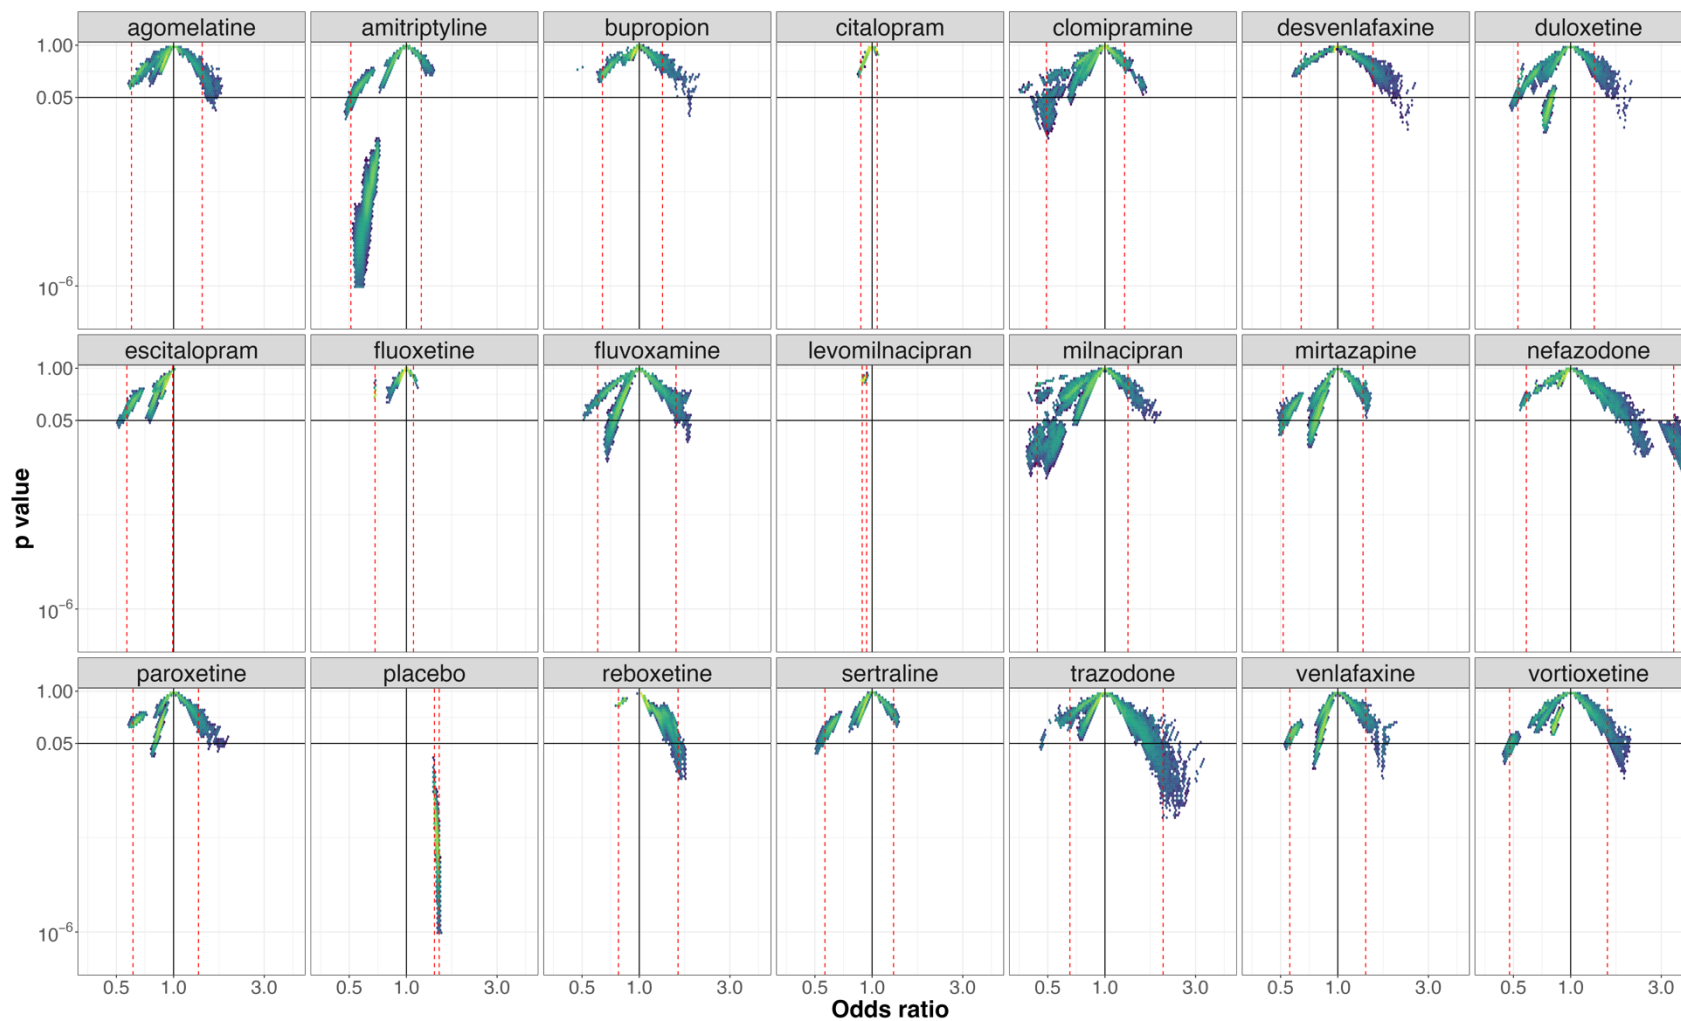

**e-figure 19:** *Vibration of effects for treatment response for the comparisons of vilazodone with the 20 remaining antidepressants and placebo (with the number of patients included in the most complete network for this comparison). An Odds ratio >1 favors vilazodone. The Colors indicate the log densities of network meta-analyses (yellow: high, green: moderate, blue: low) Dotted red lines illustrate the 1<sup>st</sup> and 99<sup>th</sup> percentiles.*

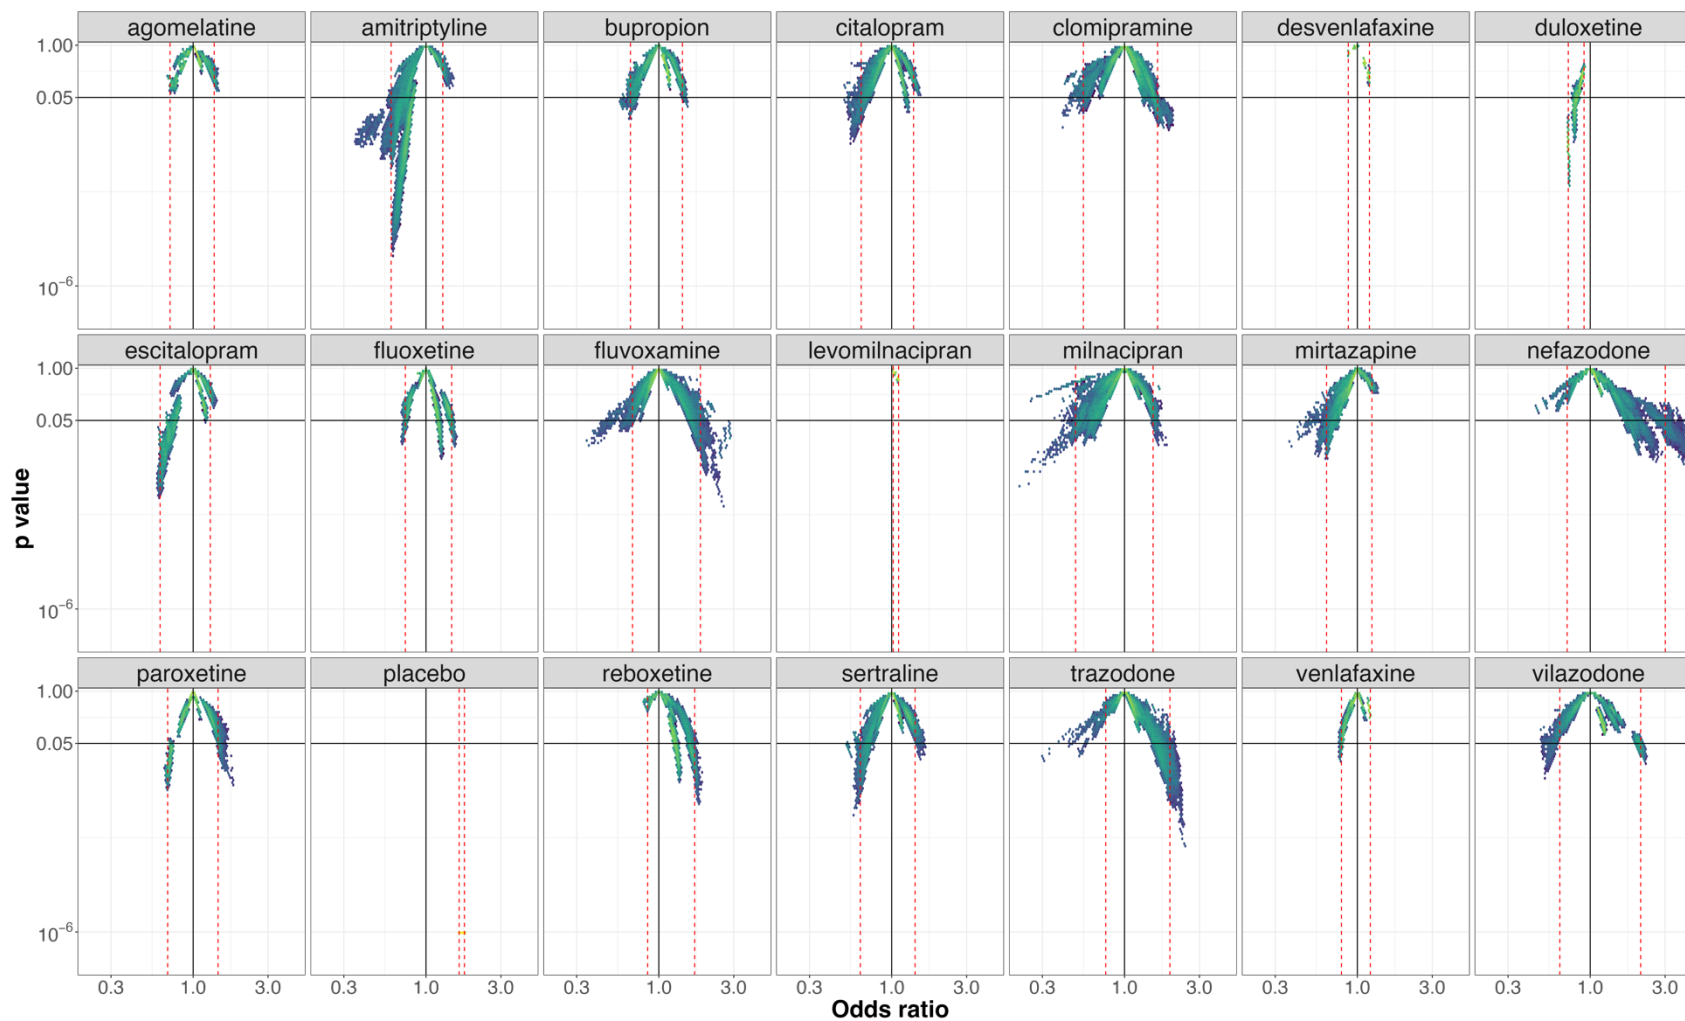

**e-figure 20:** *Vibration of effects for treatment response for the comparisons of vortioxetine with the 20 remaining antidepressants and placebo (with the number of patients included in the most complete network for this comparison). An Odds ratio >1 favors vortioxetine. The Colors indicate the log densities of network meta-analyses (yellow: high, green: moderate, blue: low) Dotted red lines illustrate the 1<sup>st</sup> and 99<sup>th</sup> percentiles.*

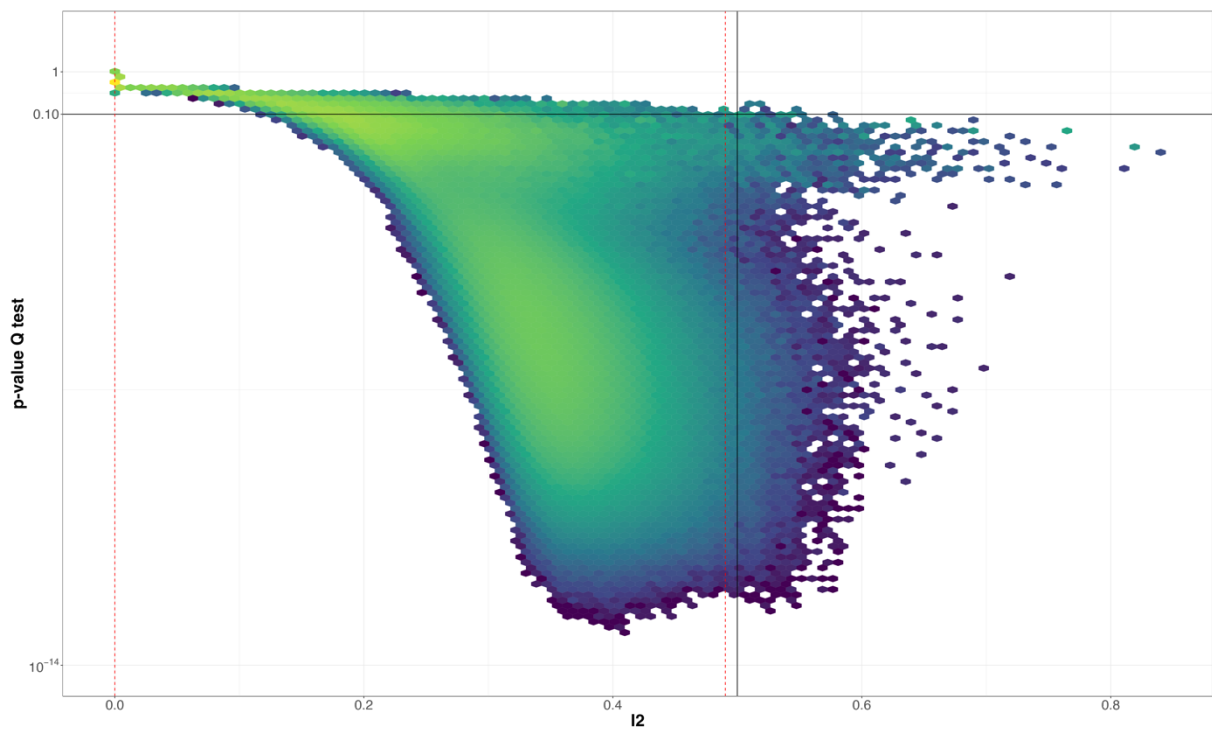

**e-figure 21:** *Vibration of effects for heterogeneity for NMAs.  $I^2 > 0.5$  indicates a high level of heterogeneity. The colors indicate the log densities of network meta-analyses (yellow: high, green: moderate, blue: low) for the outcome treatment response.*



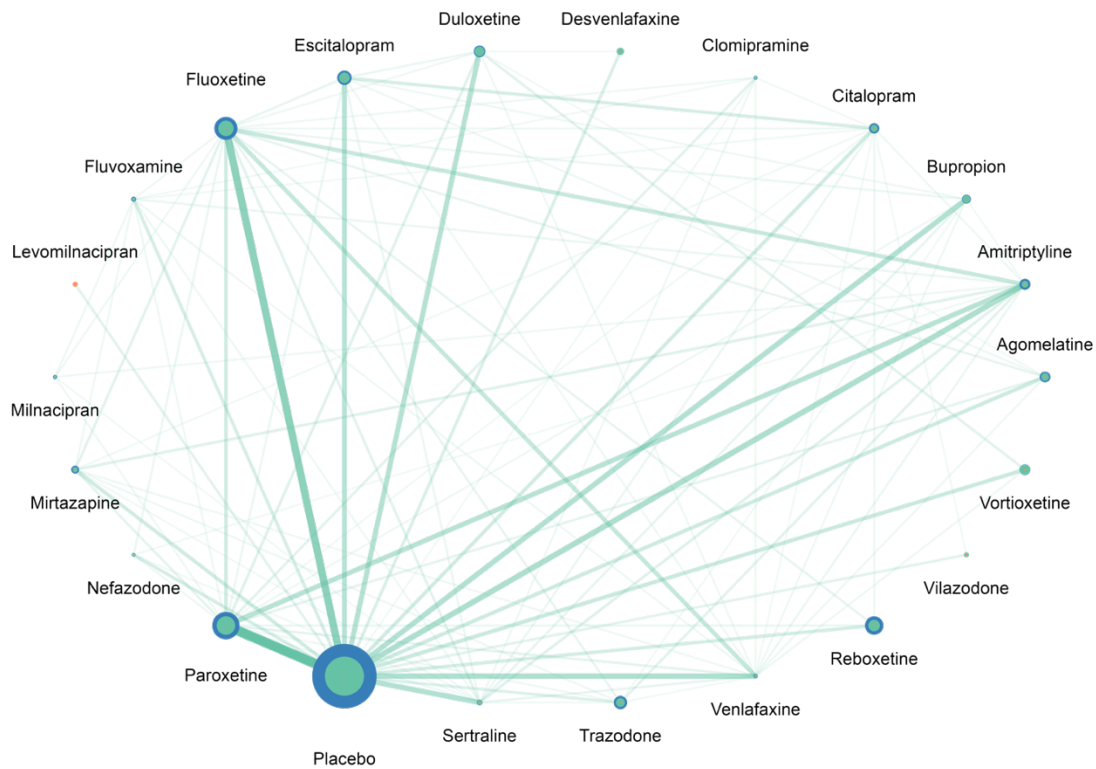

**e-figure 22:** *Distribution of network geometries in the 4 121 590 NMAs on treatment discontinuation. The size of each dot indicates the number of patients allocated to the respective treatments. For each treatment, blue circles indicate the NMAs with the largest numbers of patients included, the green circles indicate the NMAs with the median number of patients included  $s$ , and the orange circles show the NMAs with the smallest number of patients included. The width of the lines is proportional to the number of trials comparing pairs of treatments in the complete NMA.*

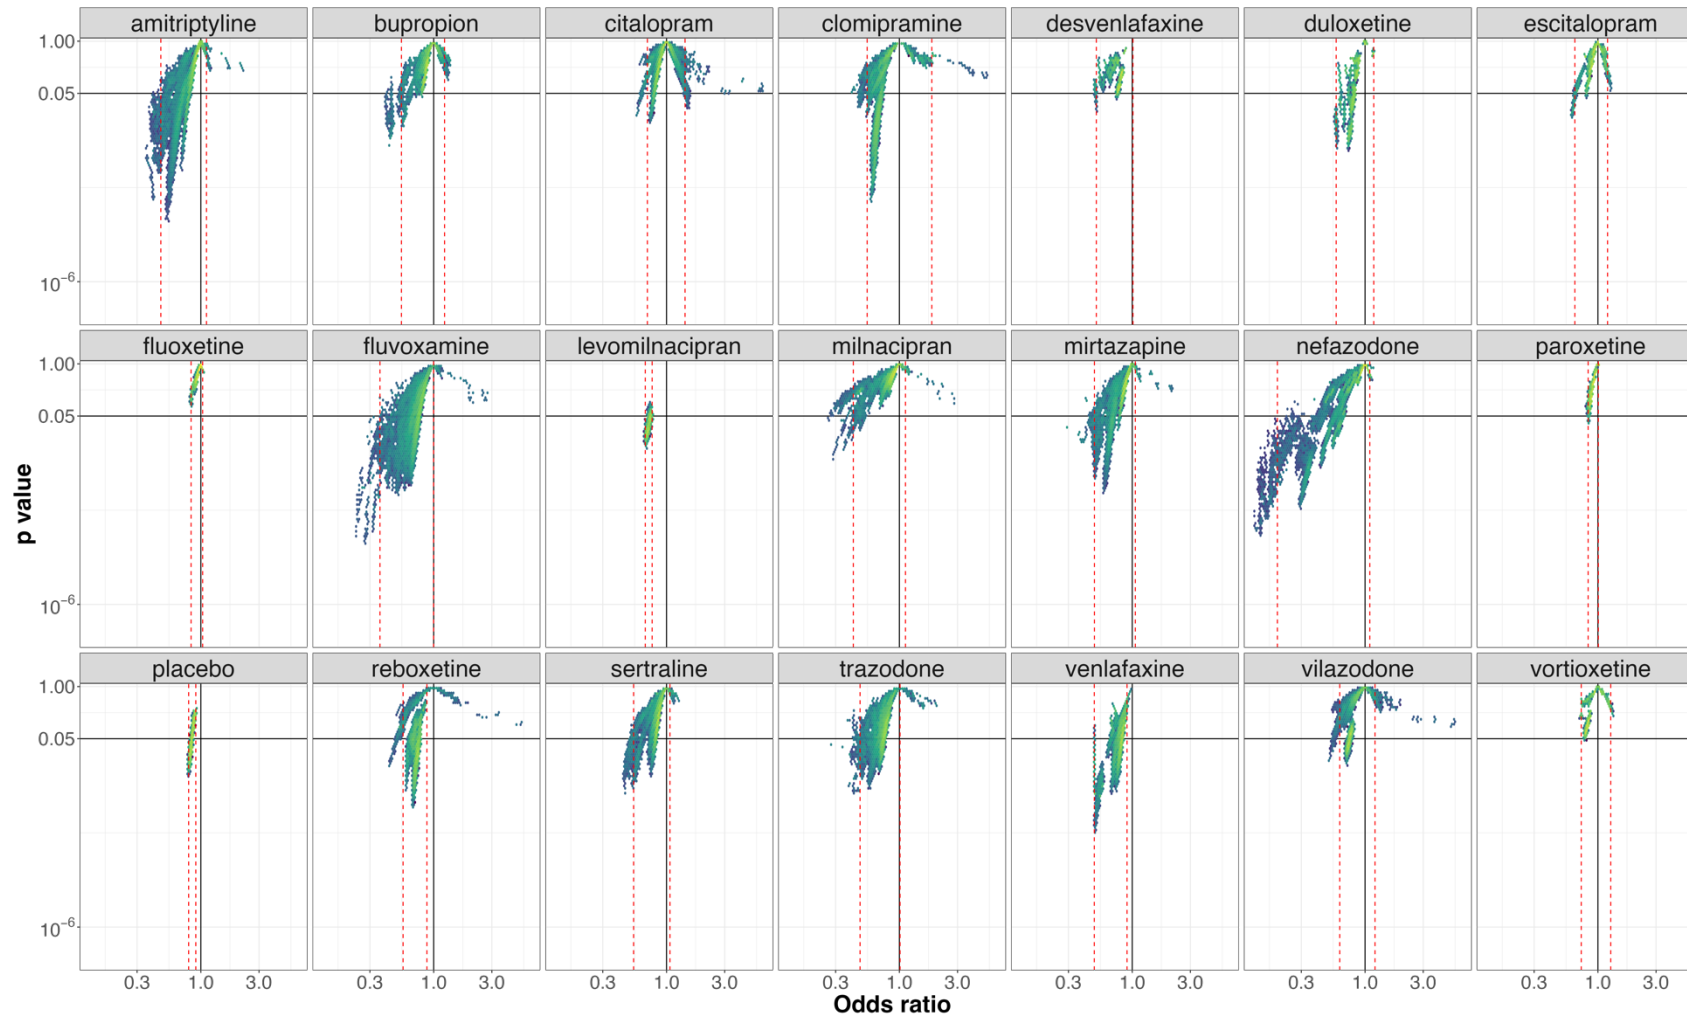

**e-figure 23:** *Vibration of effects for treatment discontinuation for the comparisons of agomelatine with the 20 remaining antidepressants and placebo (with the number of patients included in the most complete network for this comparison). An Odds ratio >1 favors agomelatine. The colors indicate the log densities of network meta-analyses (yellow: high, green: moderate, blue: low). Dotted red lines illustrate the 1<sup>st</sup> and 99<sup>th</sup> percentiles.*

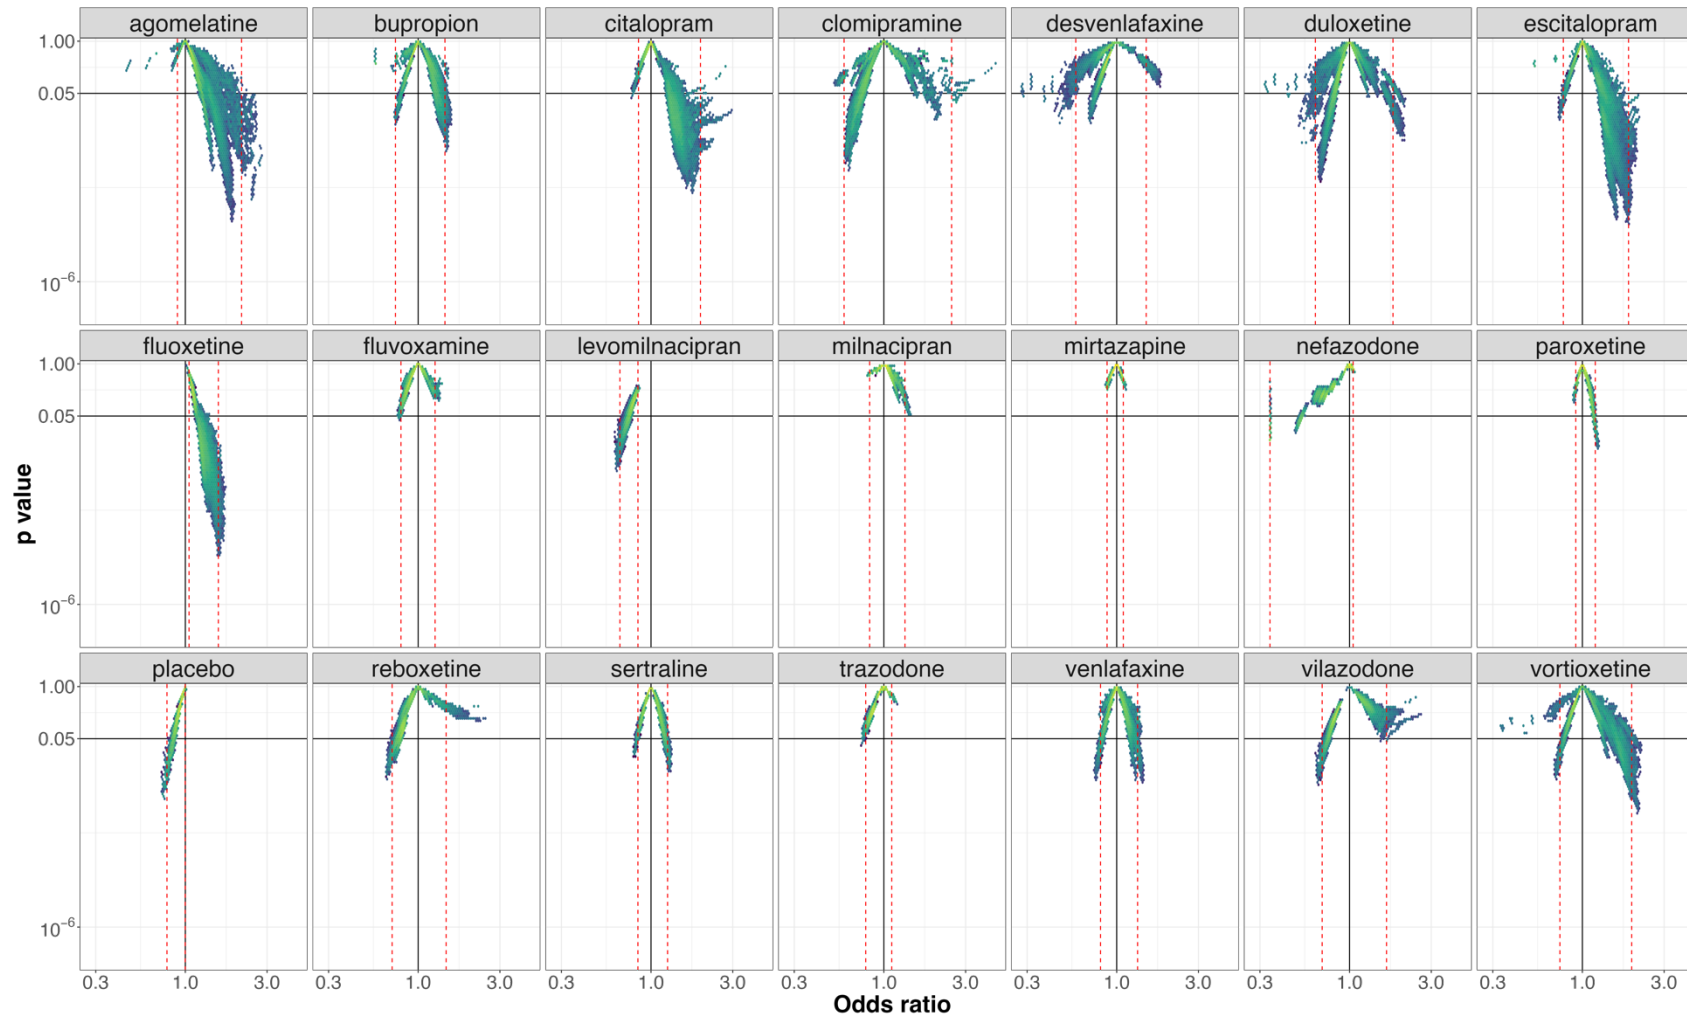

**e-figure 24:** *Vibration of effects for treatment discontinuation for the comparisons of amitriptyline with the 20 remaining antidepressants and placebo (with the number of patients included in the most complete network for this comparison). An Odds ratio >1 favors amitriptyline. The colors indicate the log densities of network meta-analyses (yellow: high, green: moderate, blue: low). Dotted red lines illustrate the 1<sup>st</sup> and 99<sup>th</sup> percentiles.*

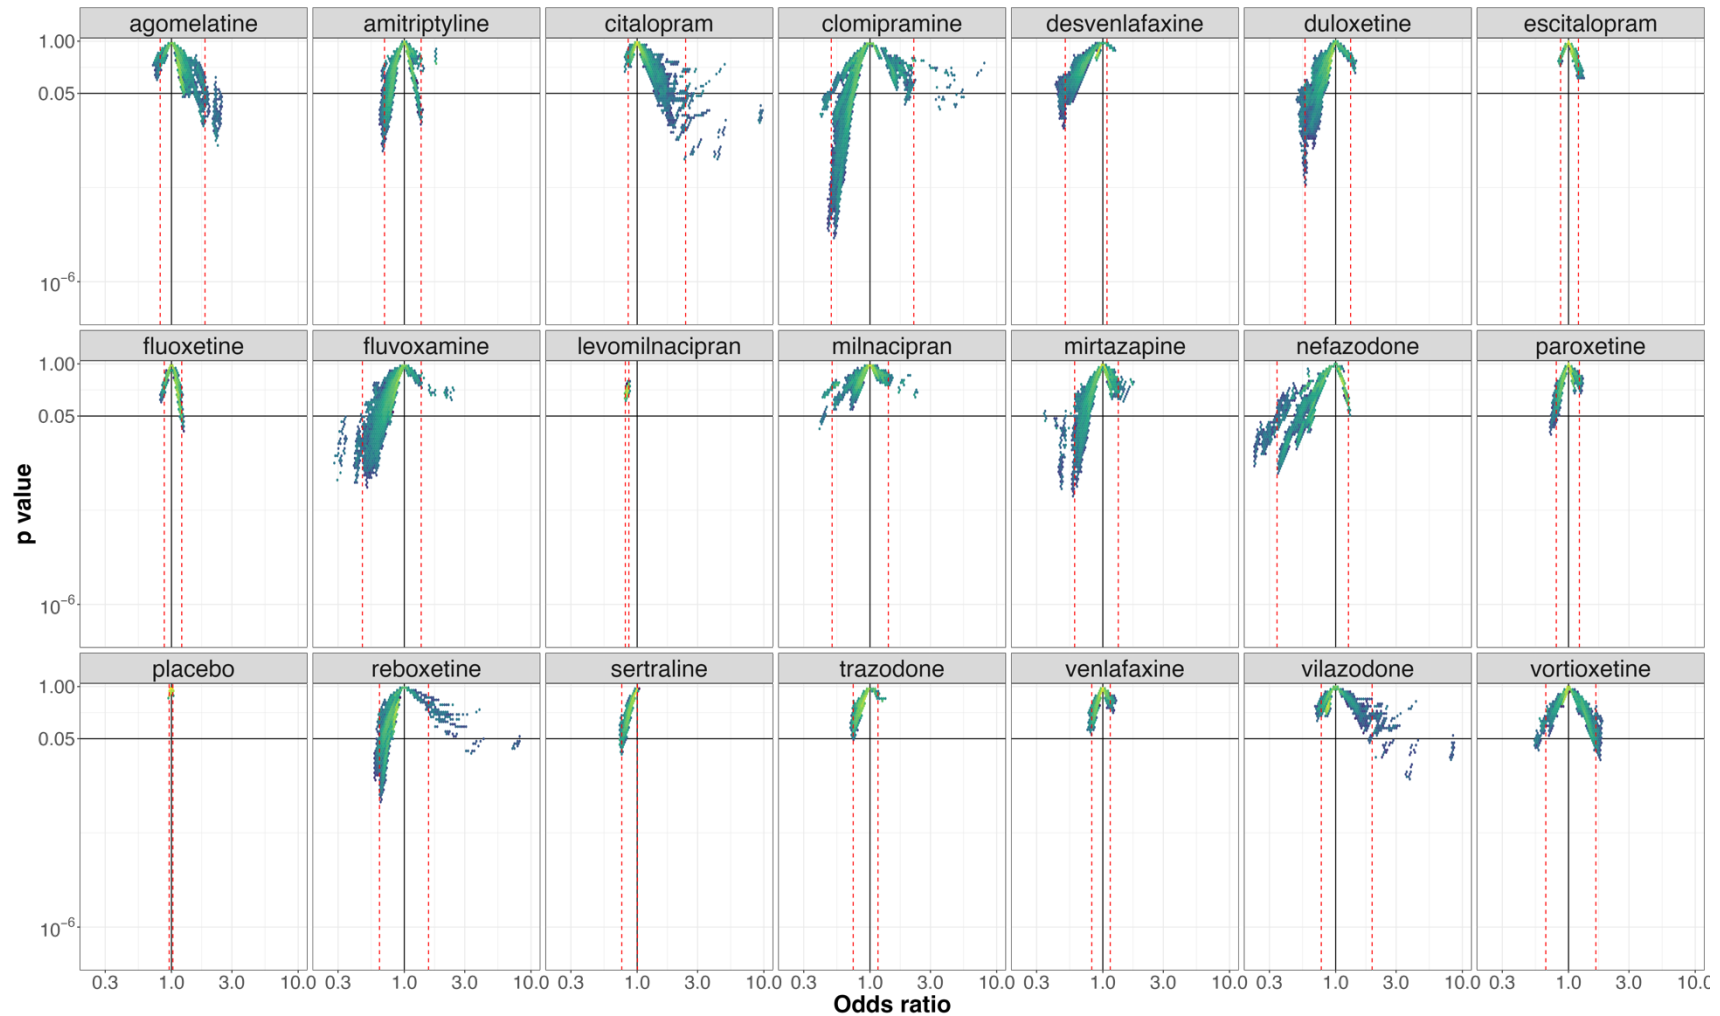

**e-figure 25:** *Vibration of effects for treatment discontinuation for the comparisons of bupropion with the 20 remaining antidepressants and placebo (with the number of patients included in the most complete network for this comparison). An Odds ratio >1 favors bupropion. The colors indicate the log densities of network meta-analyses (yellow: high, green: moderate, blue: low). Dotted red lines illustrate the 1<sup>st</sup> and 99<sup>th</sup> percentile.*

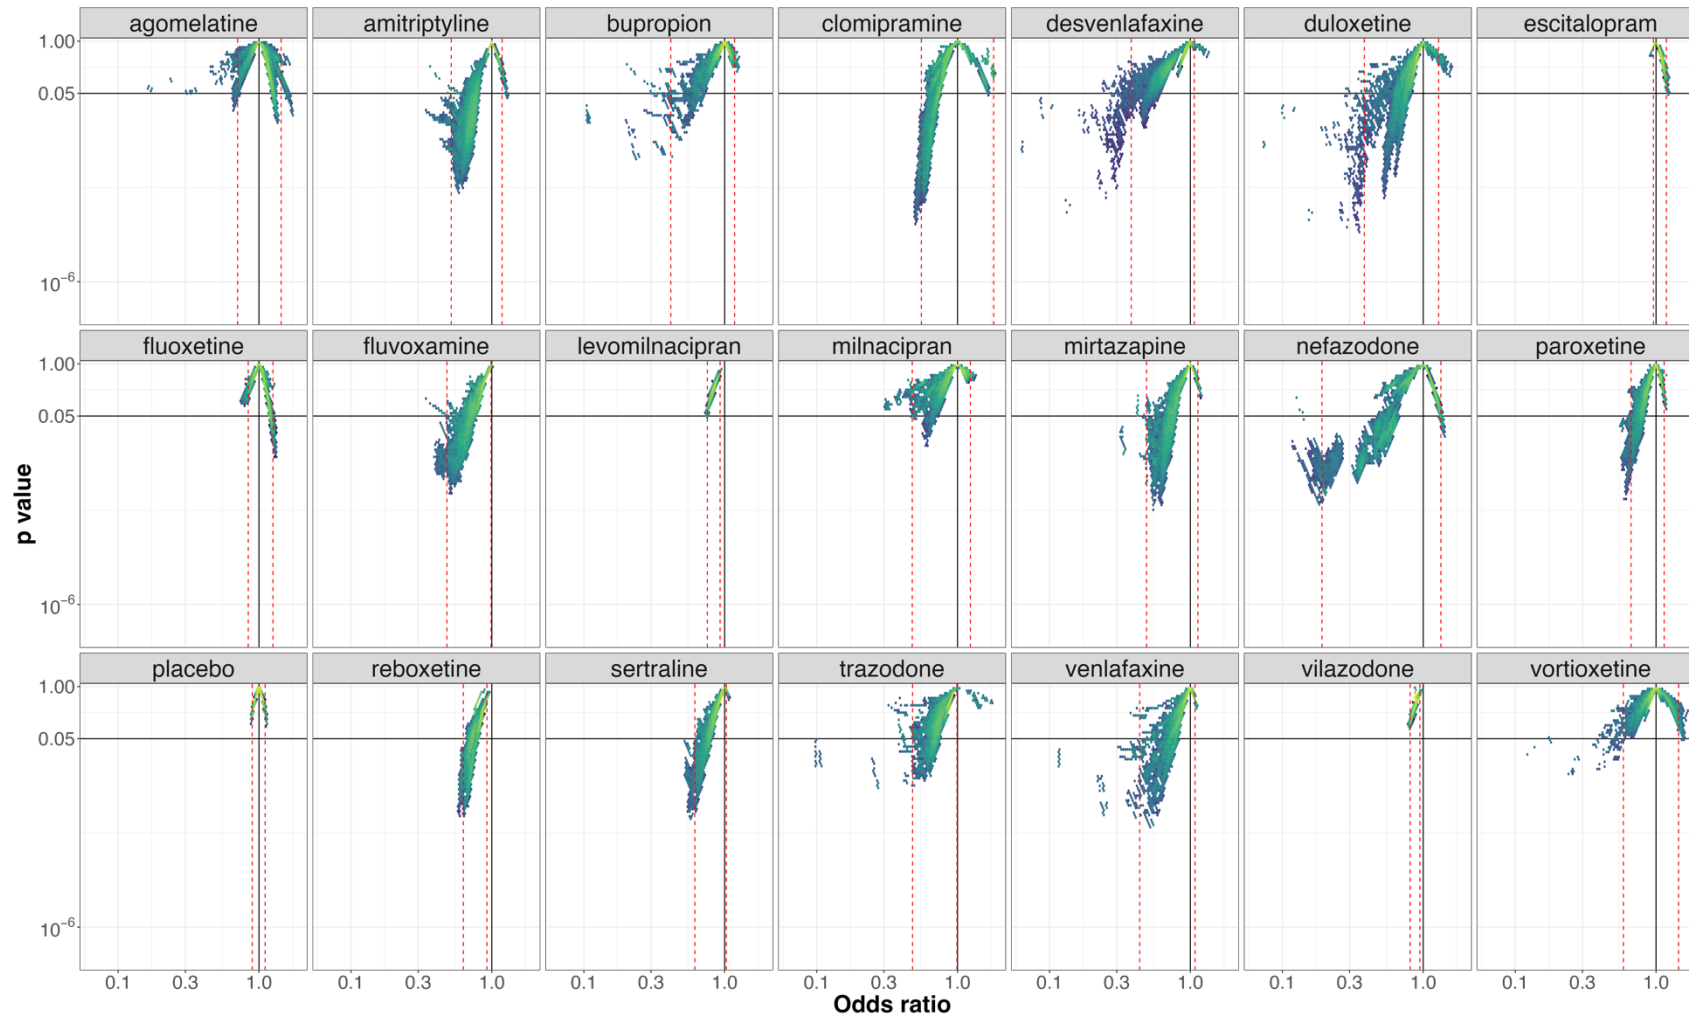

**e-figure 26:** *Vibration of effects for treatment discontinuation for the comparisons of citalopram with the 20 remaining antidepressants and placebo (with the number of patients included in the most complete network for this comparison). An Odds ratio >1 favors citalopram. The colors indicate the log densities of network meta-analyses (yellow: high, green: moderate, blue: low). Dotted red lines illustrate the 1<sup>st</sup> and 99<sup>th</sup> percentiles.*

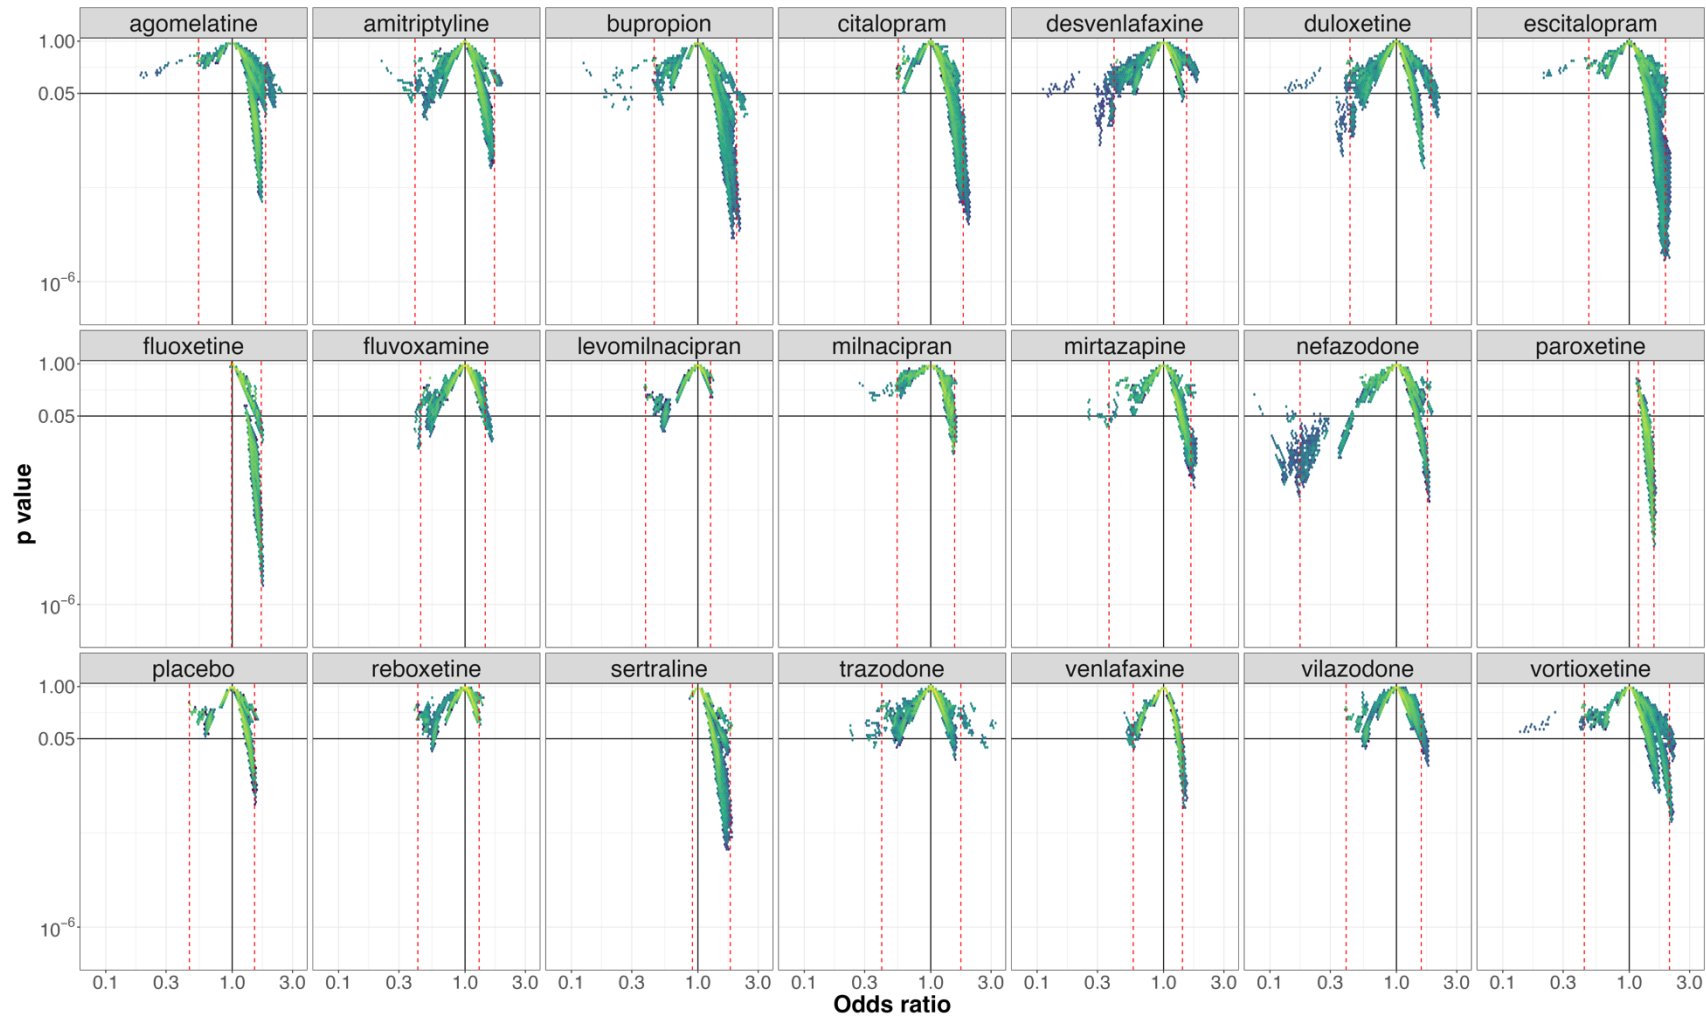

**e-figure 27:** *Vibration of effects for treatment discontinuation for the comparisons of clomipramine with the 20 remaining antidepressants and placebo (with the number of patients included in the most complete network for this comparison). An Odds ratio > 1 favors clomipramine. The colors indicate the log densities of network meta-analyses (yellow: high, green: moderate, blue: low). Dotted red lines illustrate the 1<sup>st</sup> and 99<sup>th</sup> percentiles.*

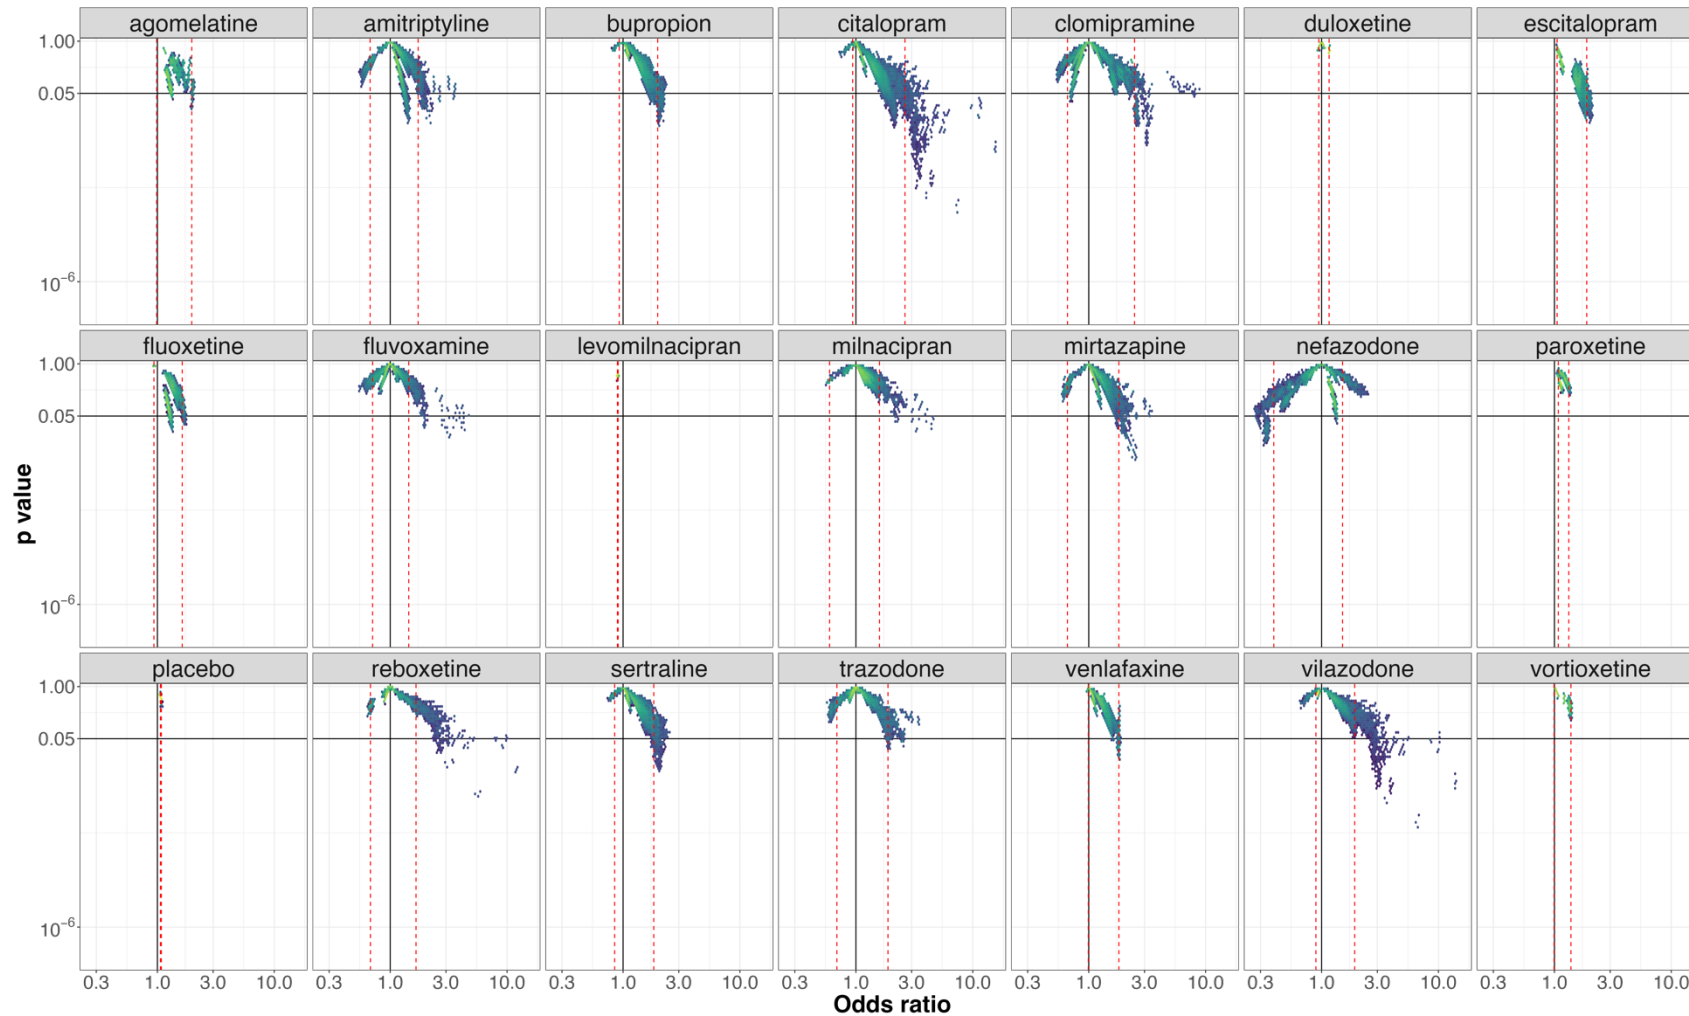

**e-figure 28:** *Vibration of effects for treatment discontinuation for the comparisons of desvenlafaxine with the 20 remaining antidepressants and placebo (with the number of patients included in the most complete network for this comparison). An Odds ratio >1 favors desvenlafaxine. The colors indicate the log densities of network meta-analyses (yellow: high, green: moderate, blue: low). Dotted red lines illustrate the 1<sup>st</sup> and 99<sup>th</sup> percentiles.*

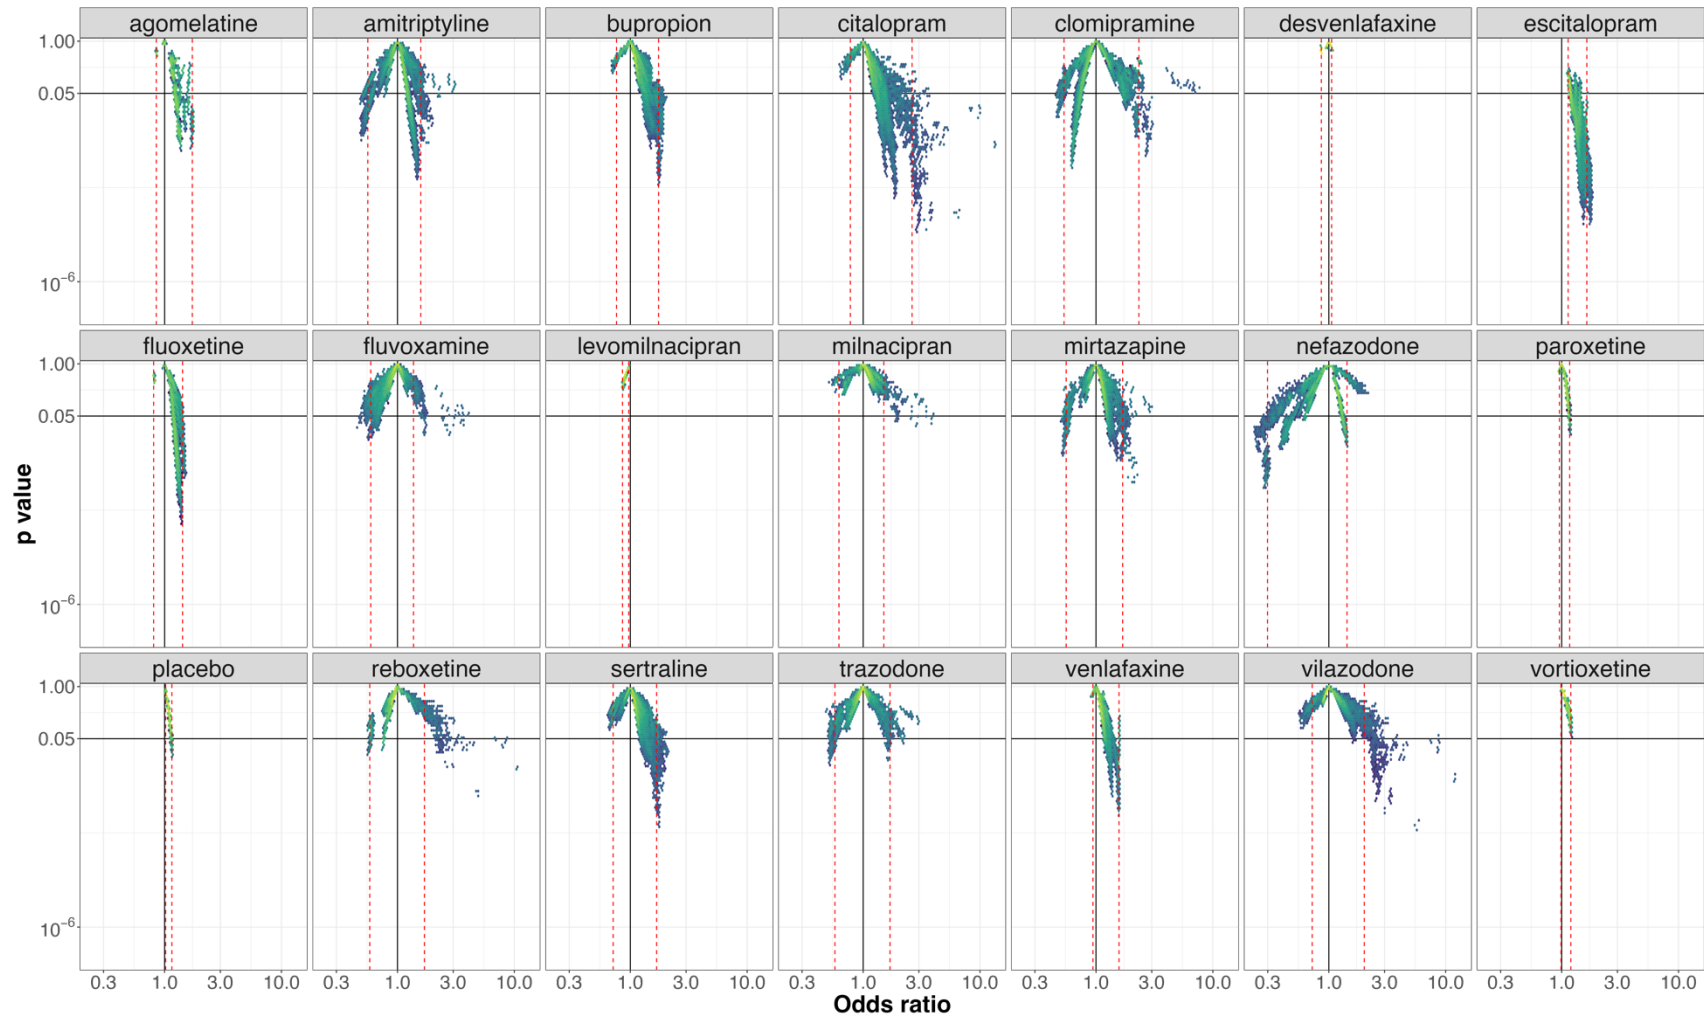

**e-figure 29:** *Vibration of effects for treatment discontinuation for the comparisons of duloxetine with the 20 remaining antidepressants and placebo (with the number of patients included in the most complete network for this comparison). An Odds ratio >1 favors duloxetine. The colors indicate the log densities of network meta-analyses (yellow: high, green: moderate, blue: low). Dotted red lines illustrate the 1<sup>st</sup> and 99<sup>th</sup> percentile.*



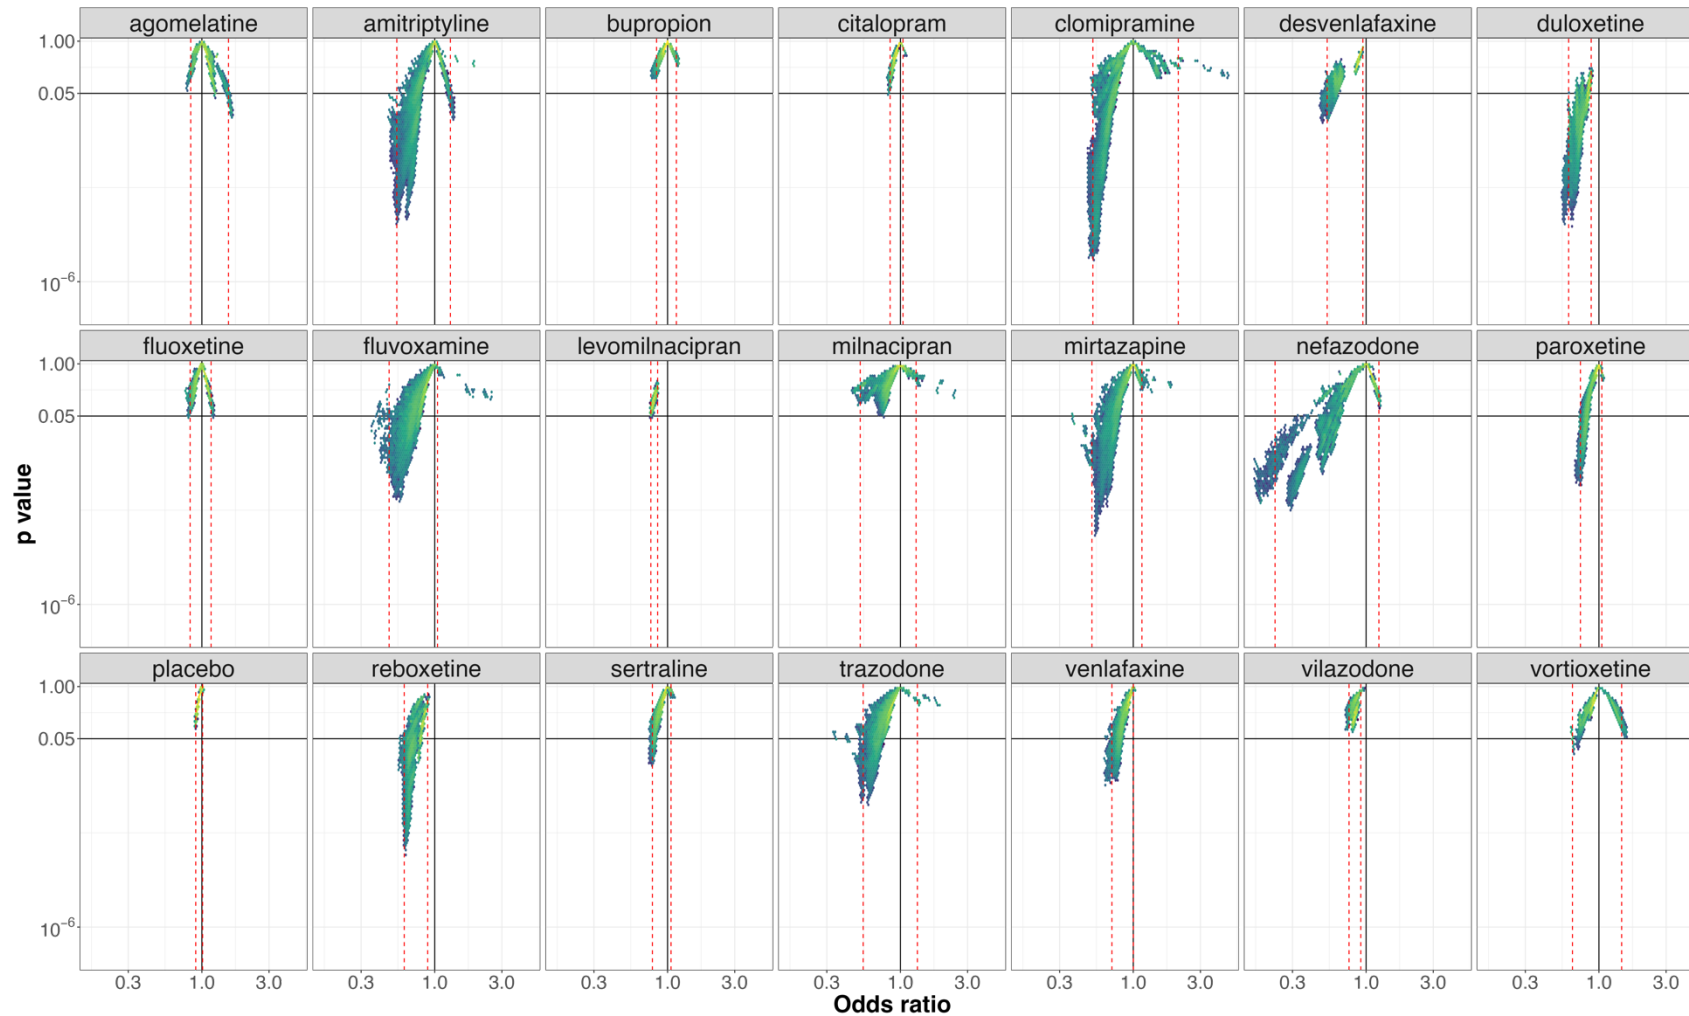

**e-figure 30:** *Vibration of effects for treatment discontinuation for the comparisons of escitalopram with the 20 remaining antidepressants and placebo (with the number of patients included in the most complete network for this comparison). An Odds ratio >1 favors escitalopram. The colors indicate the log densities of network meta-analyses (yellow: high, green: moderate, blue: low). Dotted red lines illustrate the 1<sup>st</sup> and 99<sup>th</sup> percentiles.*

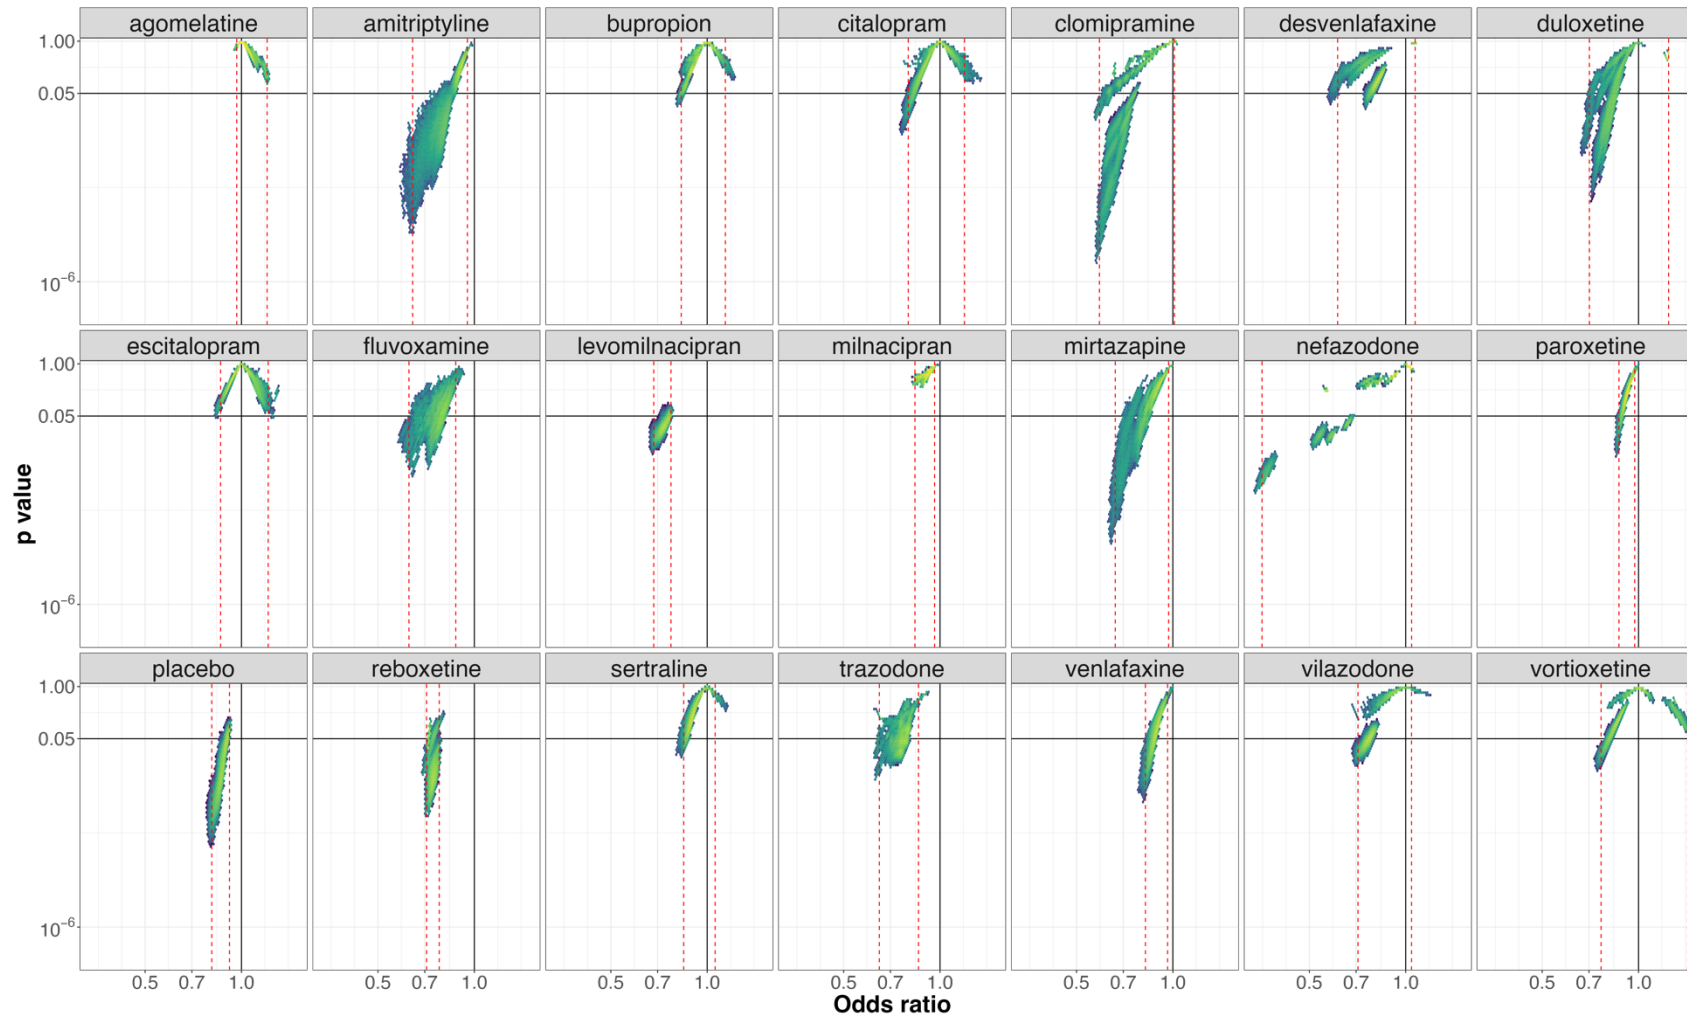

**e-figure 31:** *Vibration of effects for treatment discontinuation for the comparisons of fluoxetine with the 20 remaining antidepressants and placebo (with the number of patients included in the most complete network for this comparison). An Odds ratio >1 favors fluoxetine. The colors indicate the log densities of network meta-analyses (yellow: high, green: moderate, blue: low). Dotted red lines illustrate the 1<sup>st</sup> and 99<sup>th</sup> percentiles.*

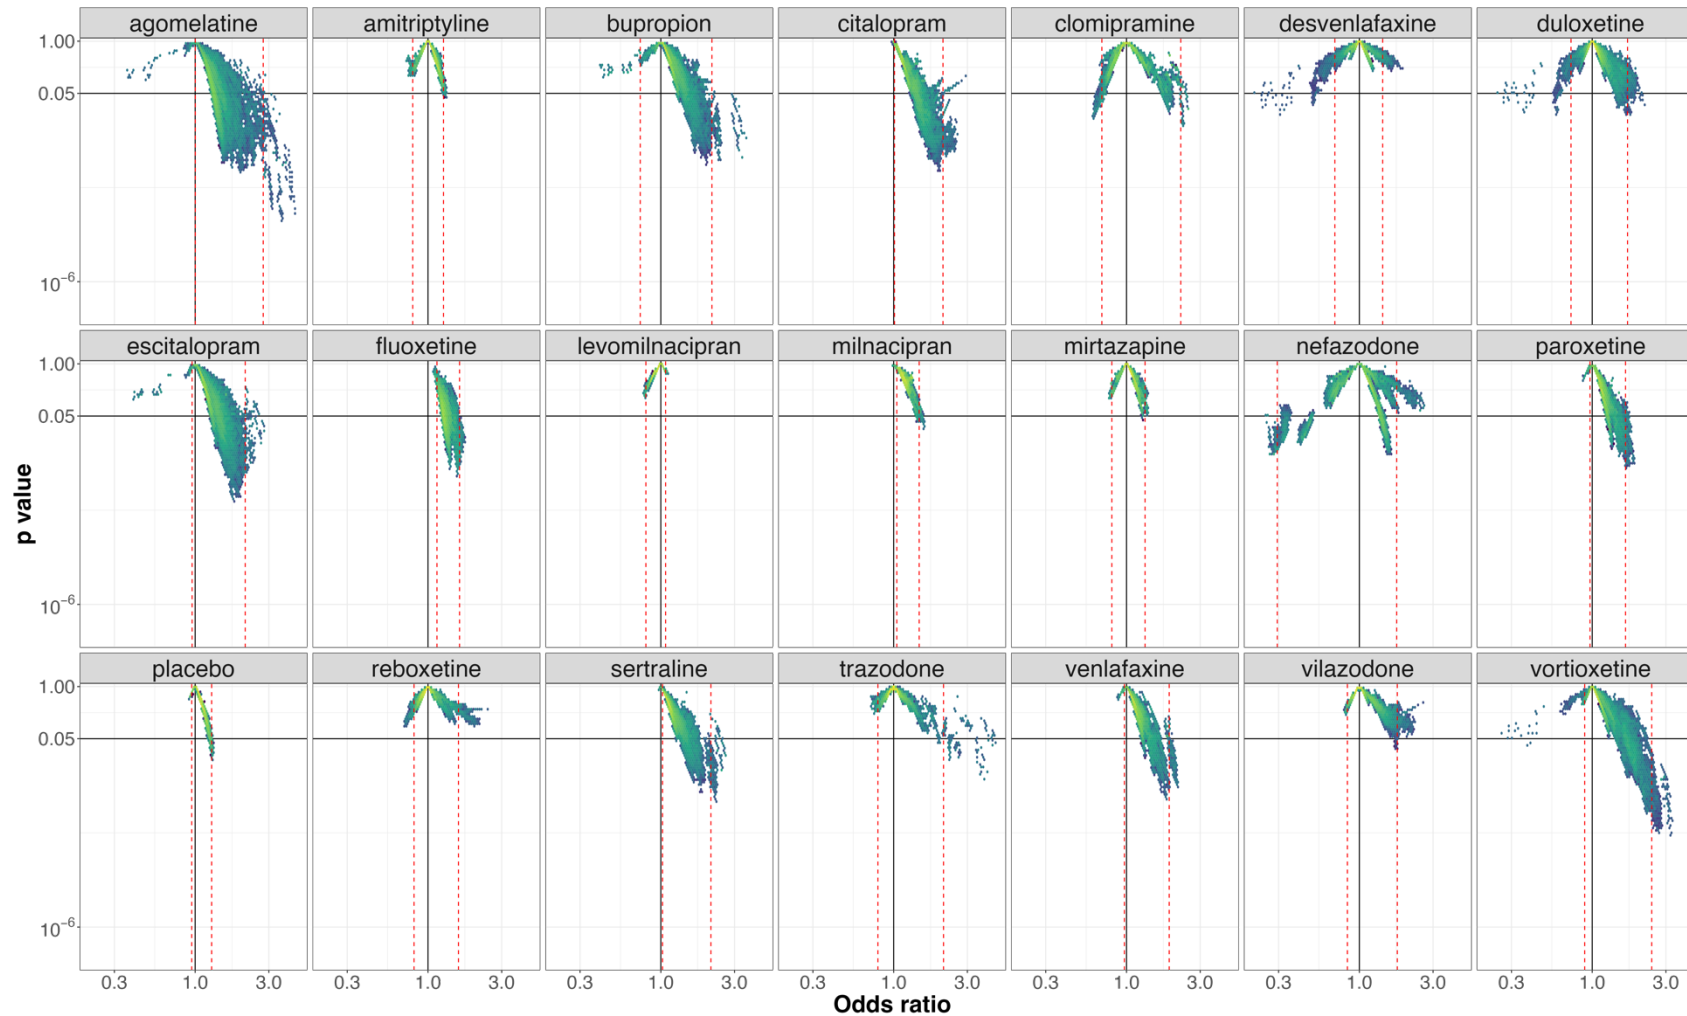

**e-figure 32:** *Vibration of effects for treatment discontinuation for the comparisons of fluvoxamine with the 20 remaining antidepressants and placebo (with the number of patients included in the most complete network for this comparison). An Odds ratio >1 favors fluvoxamine. The colors indicate the log densities of network meta-analyses (yellow: high, green: moderate, blue: low). Dotted red lines illustrate the 1<sup>st</sup> and 99<sup>th</sup> percentiles.*

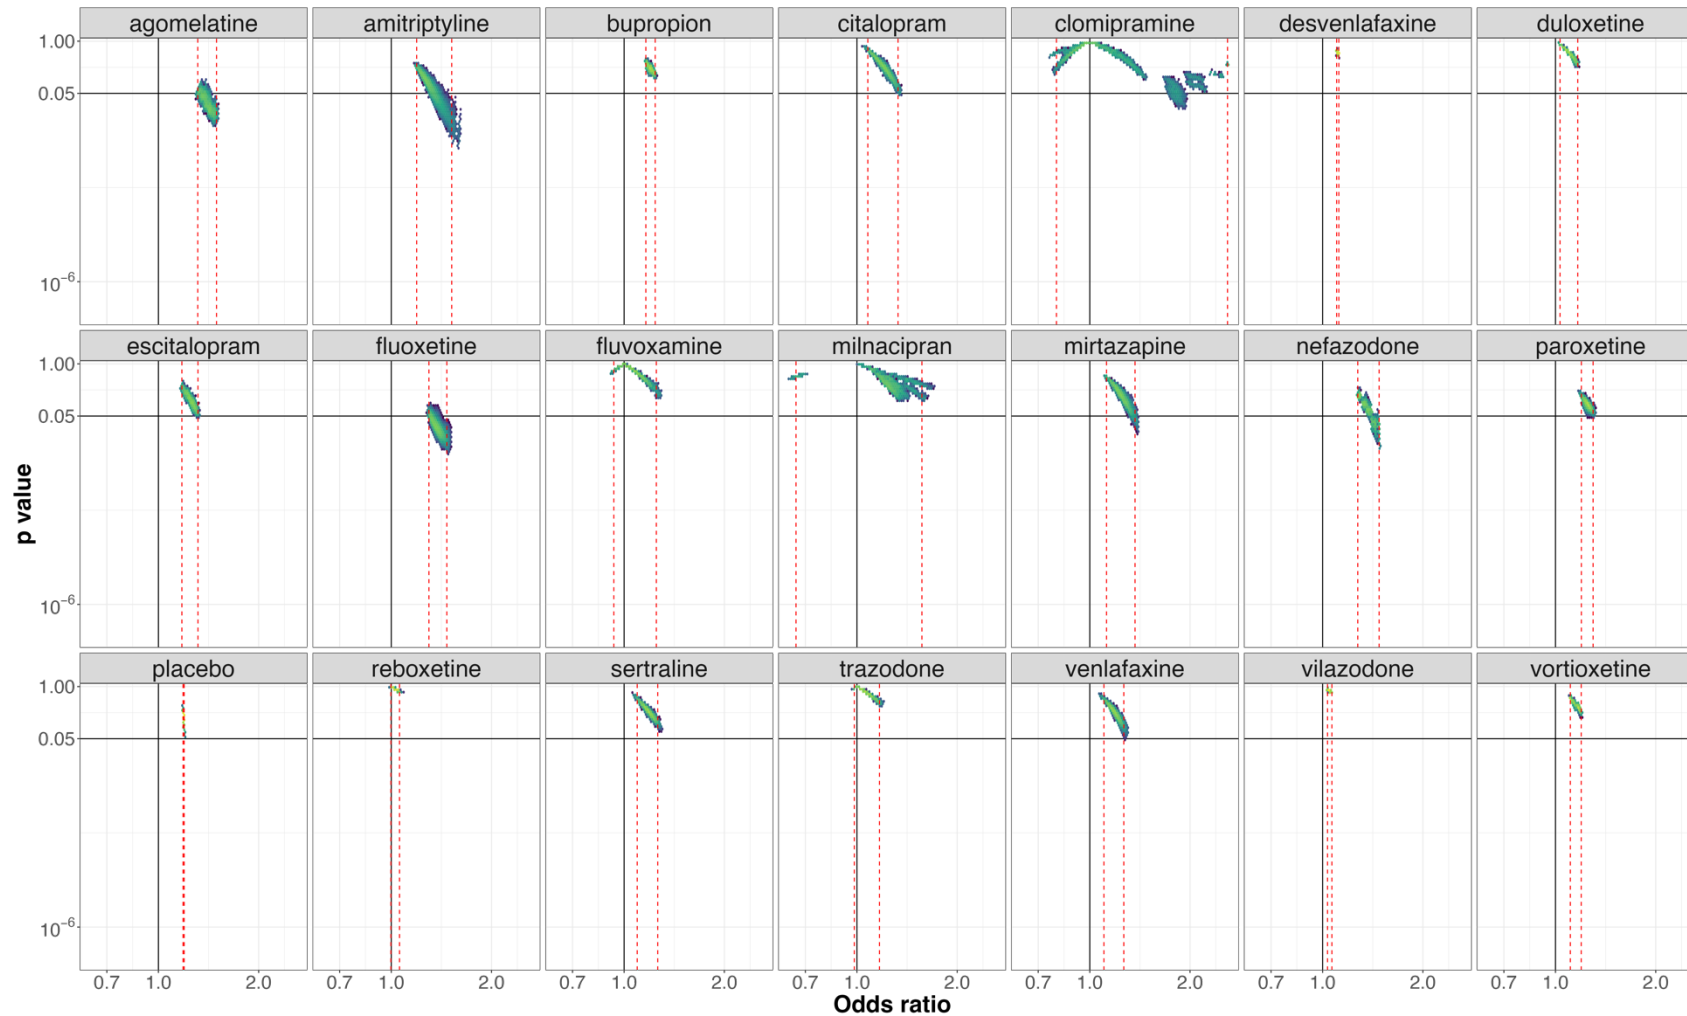

**e-figure 33:** *Vibration of effects for treatment discontinuation for the comparisons of levomilnacipran with the 20 remaining antidepressants and placebo (with the number of patients included in the most complete network for this comparison). An Odds ratio >1 favors levomilnacipran. The colors indicate the log densities of network meta-analyses (yellow: high, green: moderate, blue: low). Dotted red lines illustrate the 1<sup>st</sup> and 99<sup>th</sup> percentiles.*

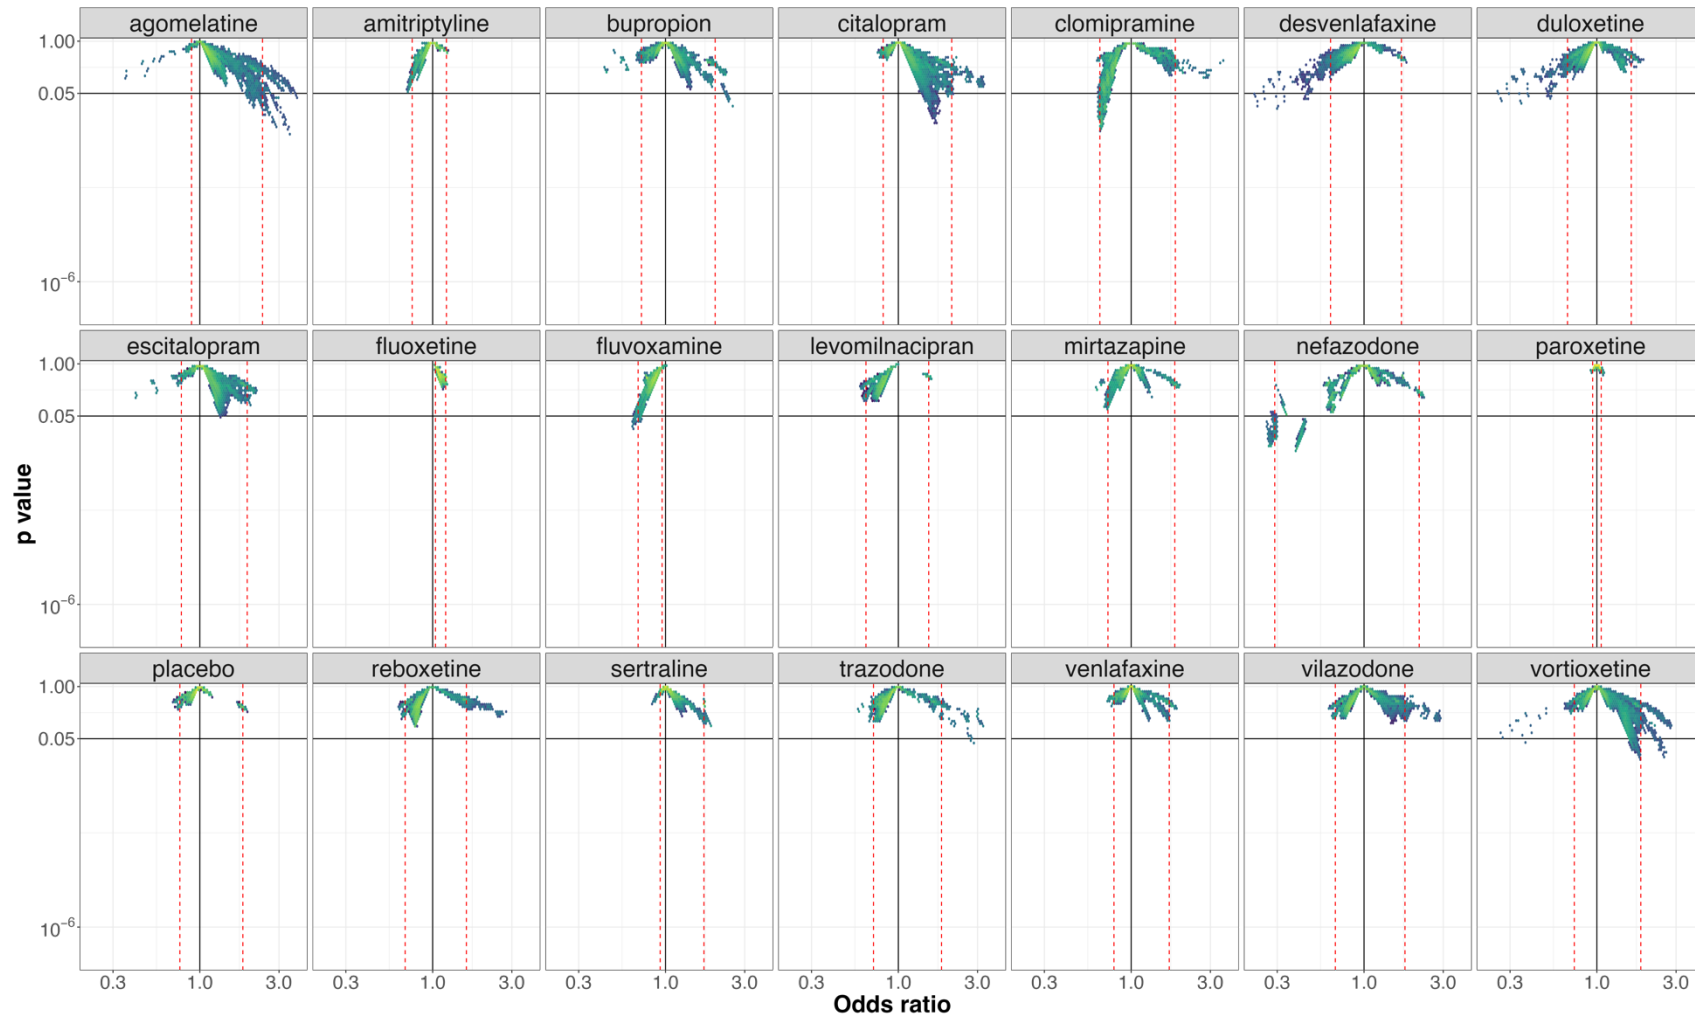

**e-figure 34:** *Vibration of effects for treatment discontinuation for the comparisons of milnacipran with the 20 remaining antidepressants and placebo (with the number of patients included in the most complete network for this comparison). An Odds ratio >1 favors milnacipran. The colors indicate the log densities of network meta-analyses (yellow: high, green: moderate, blue: low). Dotted red lines illustrate the 1<sup>st</sup> and 99<sup>th</sup> percentiles.*

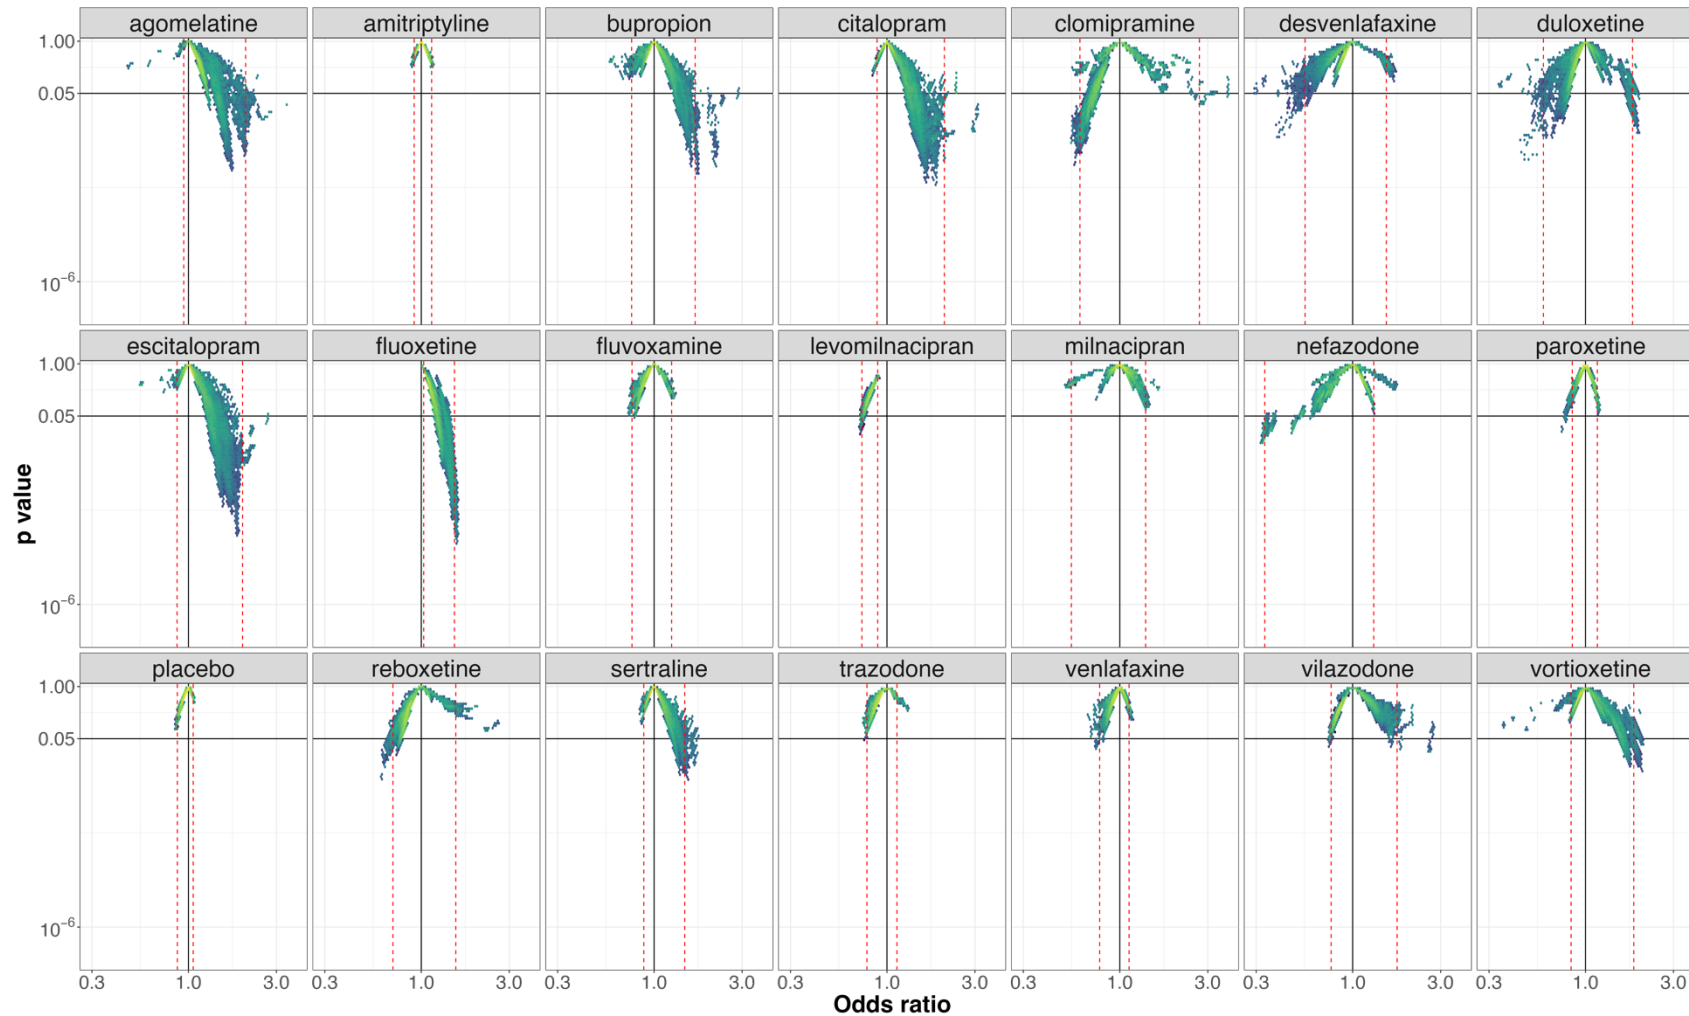

**e-figure 35:** *Vibration of effects for treatment discontinuation for the comparisons of mirtazapine with the 20 remaining antidepressants and placebo (with the number of patients included in the most complete network for this comparison). An Odds ratio >1 favors mirtazapine. The colors indicate the log densities of network meta-analyses (yellow: high, green: moderate, blue: low). Dotted red lines illustrate the 1<sup>st</sup> and 99<sup>th</sup> percentiles.*

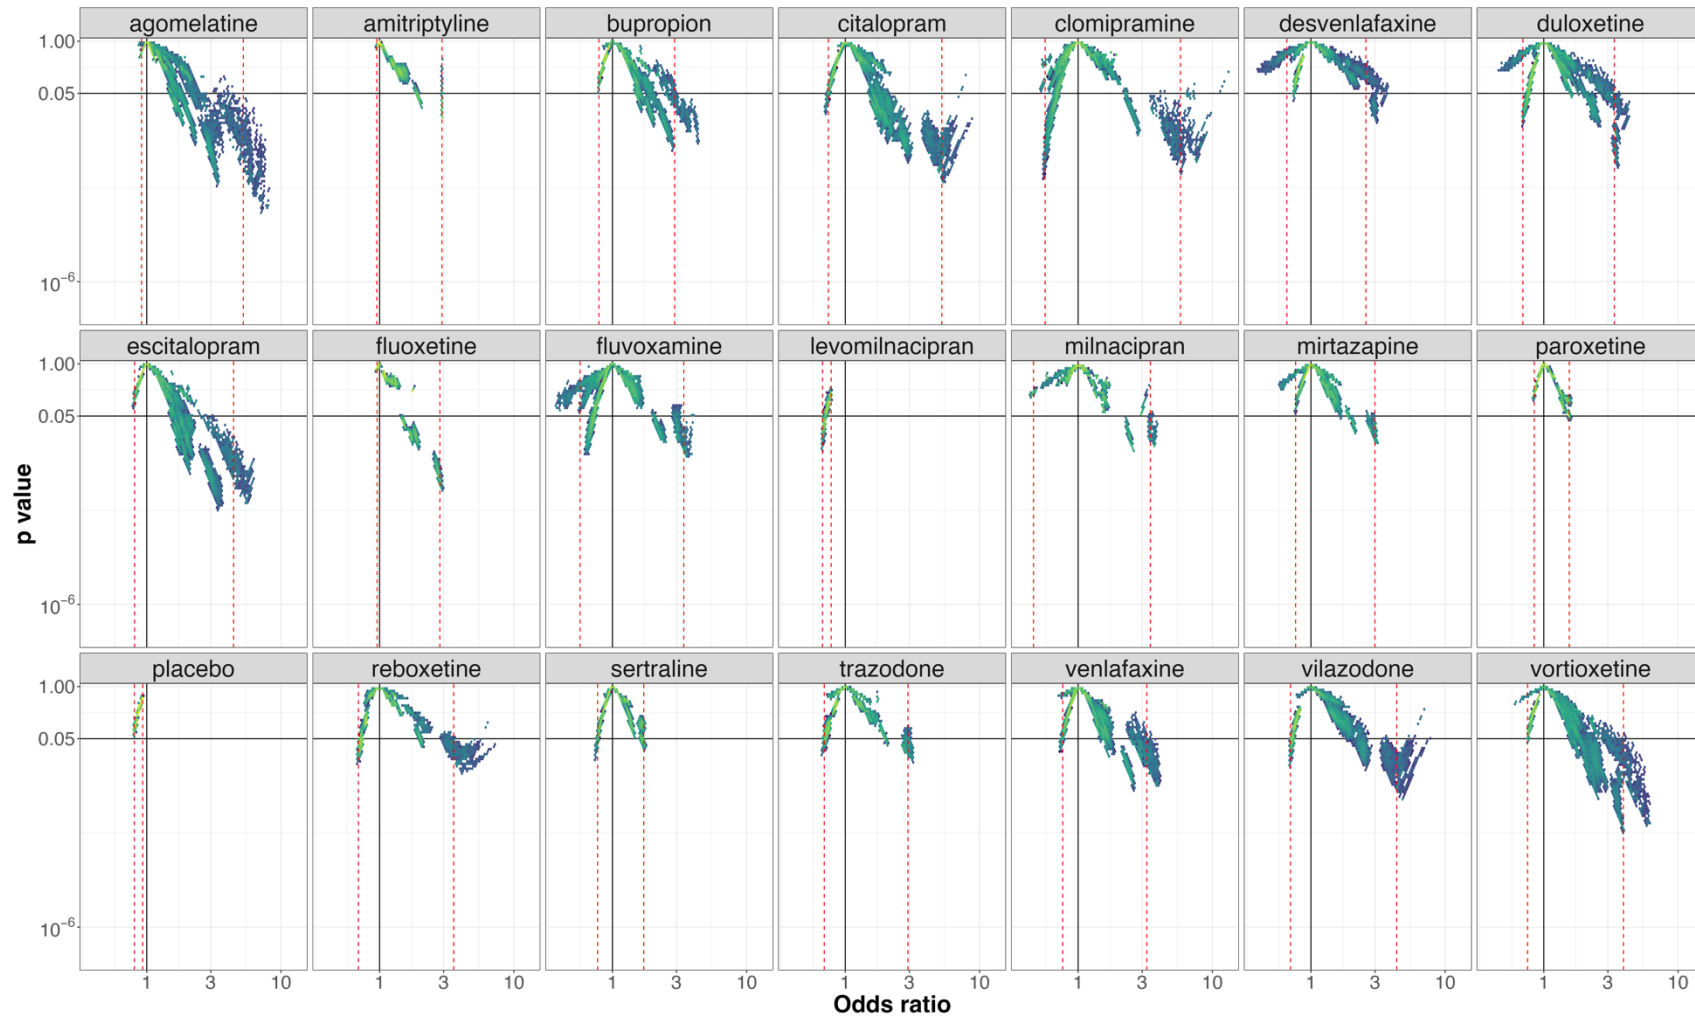

**e-figure 36:** *Vibration of effects for treatment discontinuation for the comparisons of nefazodone with the 20 remaining antidepressants and placebo (with the number of patients included in the most complete network for this comparison). An Odds ratio >1 favors nefazodone. The colors indicate the log densities of network meta-analyses (yellow: high, green: moderate, blue: low). Dotted red lines illustrate the 1<sup>st</sup> and 99<sup>th</sup> percentiles.*

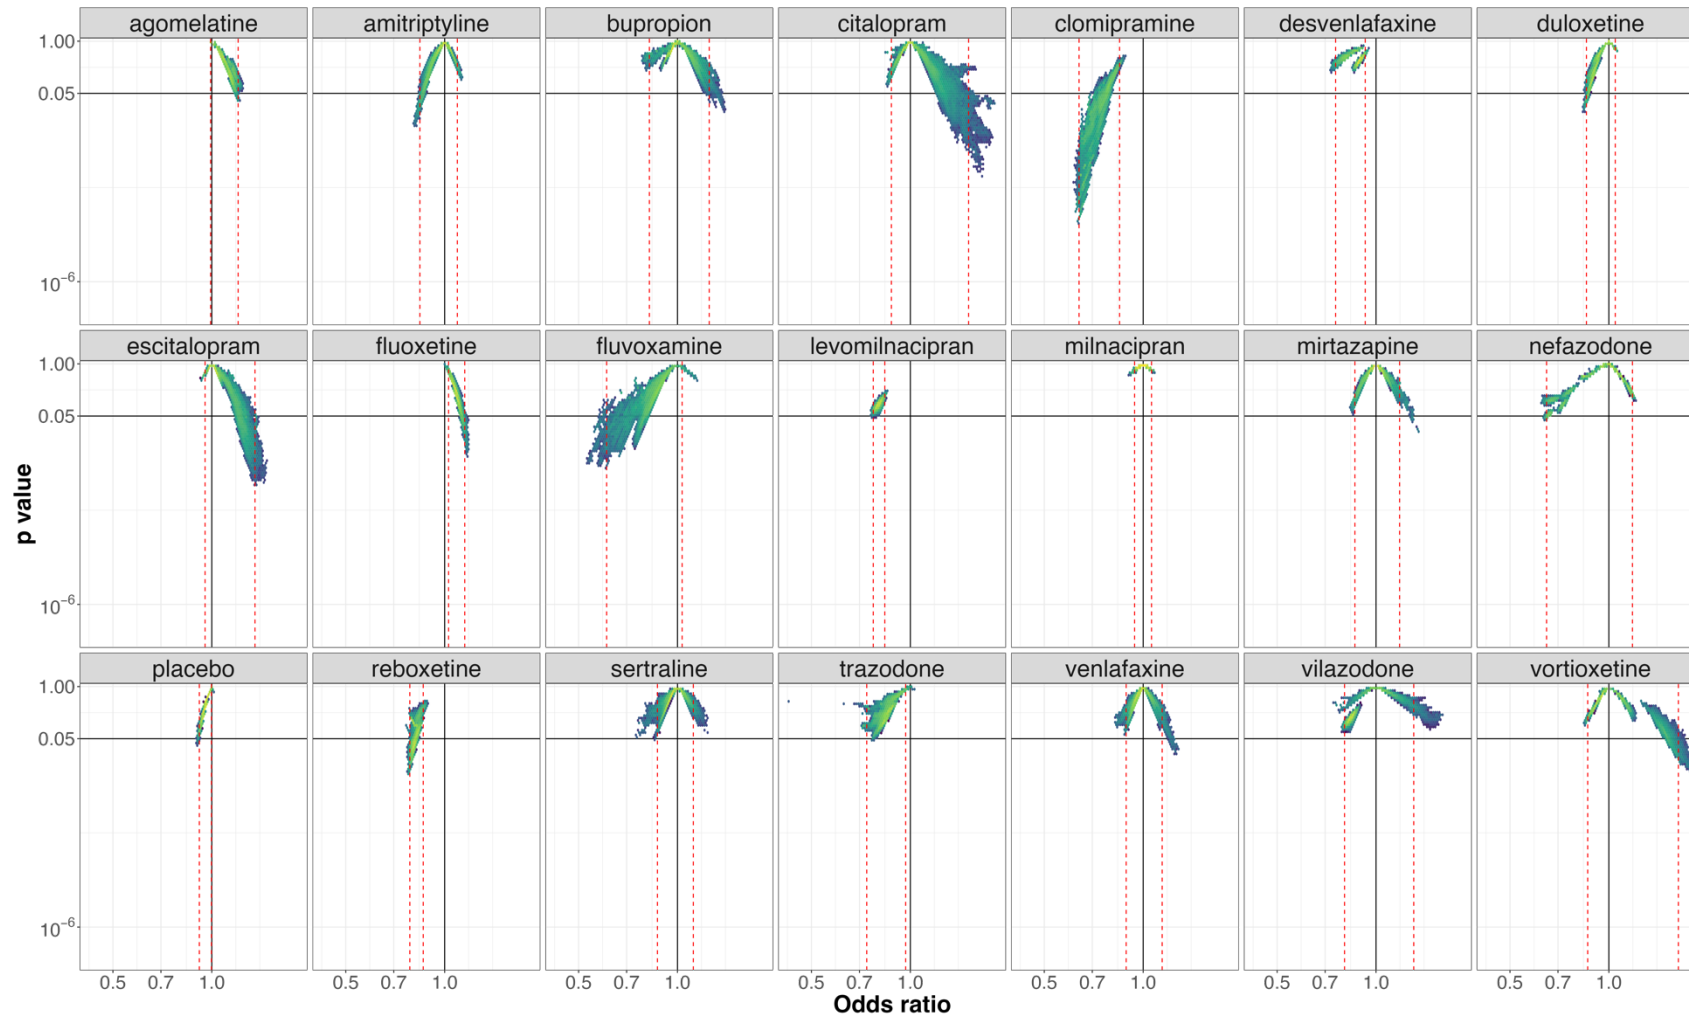

**e-figure 37:** *Vibration of effects for treatment discontinuation for the comparisons of paroxetine with the 20 remaining antidepressants and placebo (with the number of patients included in the most complete network for this comparison). An Odds ratio >1 favors paroxetine. The colors indicate the log densities of network meta-analyses (yellow: high, green: moderate, blue: low). Dotted red lines illustrate the 1<sup>st</sup> and 99<sup>th</sup> percentiles.*



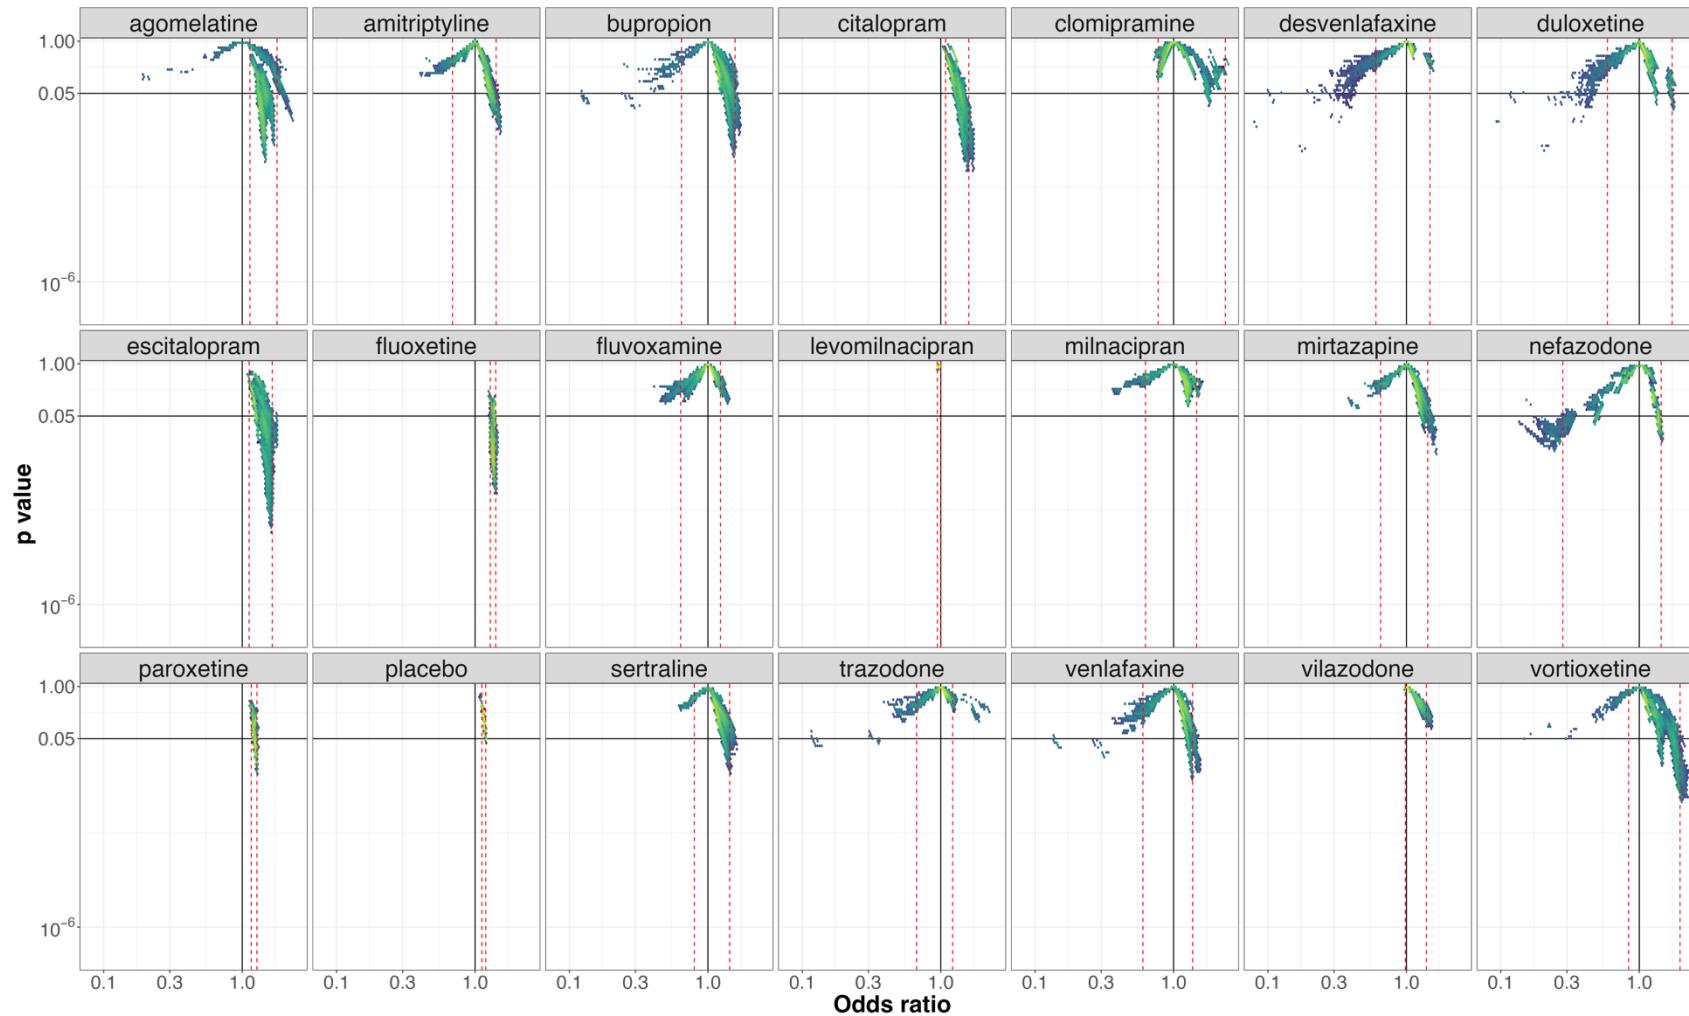

**e-figure 38:** *Vibration of effects for treatment discontinuation for the comparisons of reboxetine with the 20 remaining antidepressants and placebo (with the number of patients included in the most complete network for this comparison). An Odds ratio >1 favors reboxetine. The colors indicate the log densities of network meta-analyses (yellow: high, green: moderate, blue: low). Dotted red lines illustrate the 1<sup>st</sup> and 99<sup>th</sup> percentiles.*

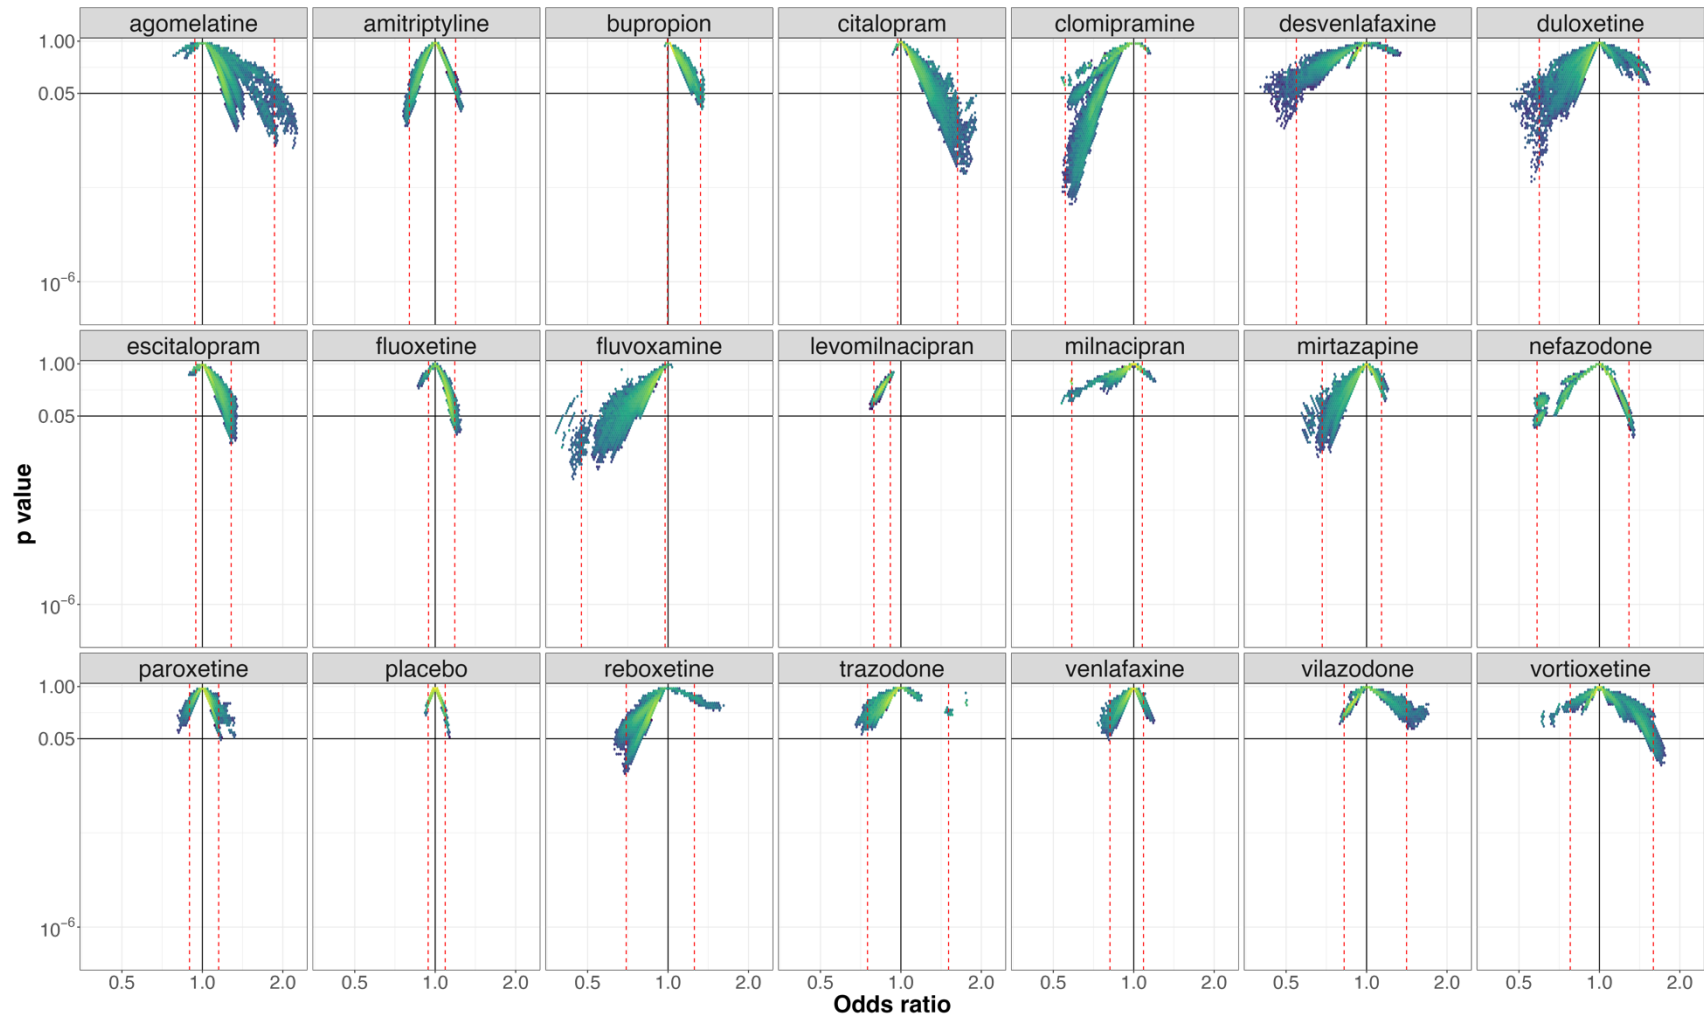

**e-figure 39:** *Vibration of effects for treatment discontinuation for the comparisons of sertraline with the 20 remaining antidepressants and placebo (with the number of patients included in the most complete network for this comparison). An Odds ratio >1 favors sertraline. The colors indicate the log densities of network meta-analyses (yellow: high, green: moderate, blue: low). Dotted red lines illustrate the 1<sup>st</sup> and 99<sup>th</sup> percentiles.*

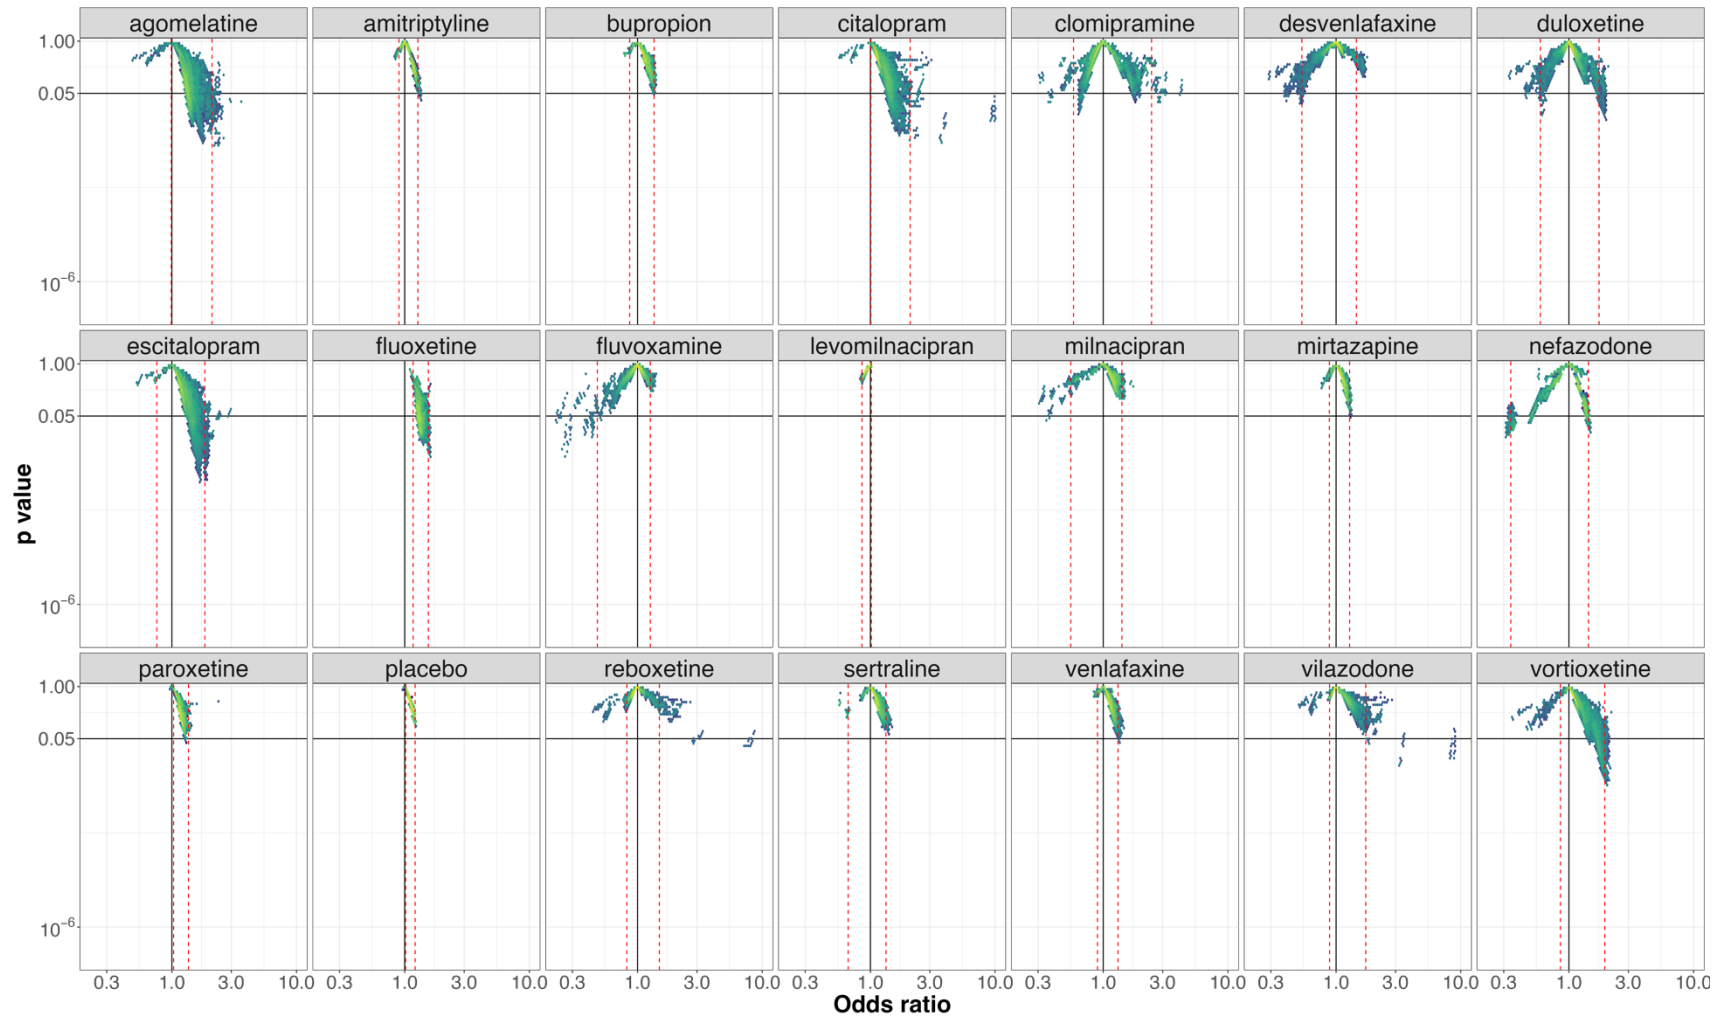

**e-figure 40:** *Vibration of effects for treatment discontinuation for the comparisons of trazodone with the 20 remaining antidepressants and placebo (with the number of patients included in the most complete network for this comparison). An Odds ratio >1 favors trazodone. The colors indicate the log densities of network meta-analyses (yellow: high, green: moderate, blue: low). Dotted red lines illustrate the 1<sup>st</sup> and 99<sup>th</sup> percentiles.*

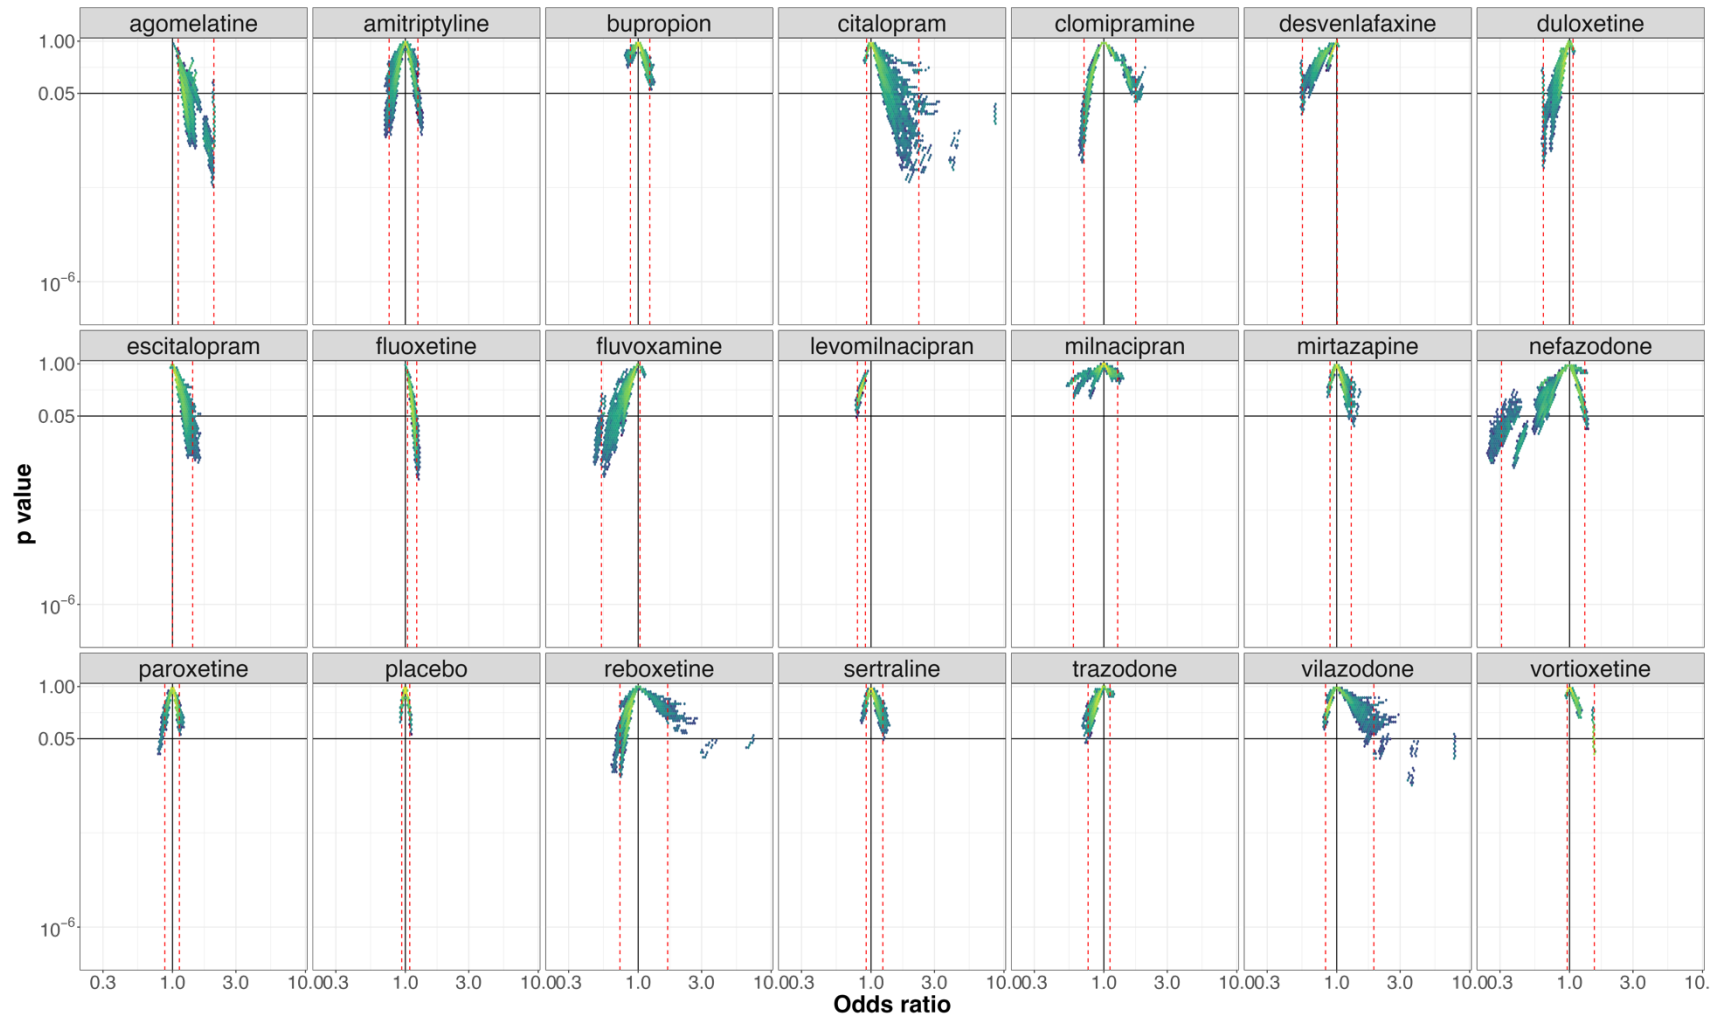

**e-figure 41:** *Vibration of effects for treatment discontinuation for the comparisons of venlafaxine with the 20 remaining antidepressants and placebo (with the number of patients included in the most complete network for this comparison). An Odds ratio >1 favors venlafaxine. The colors indicate the log densities of network meta-analyses (yellow: high, green: moderate, blue: low). Dotted red lines illustrate the 1<sup>st</sup> and 99<sup>th</sup> percentiles.*

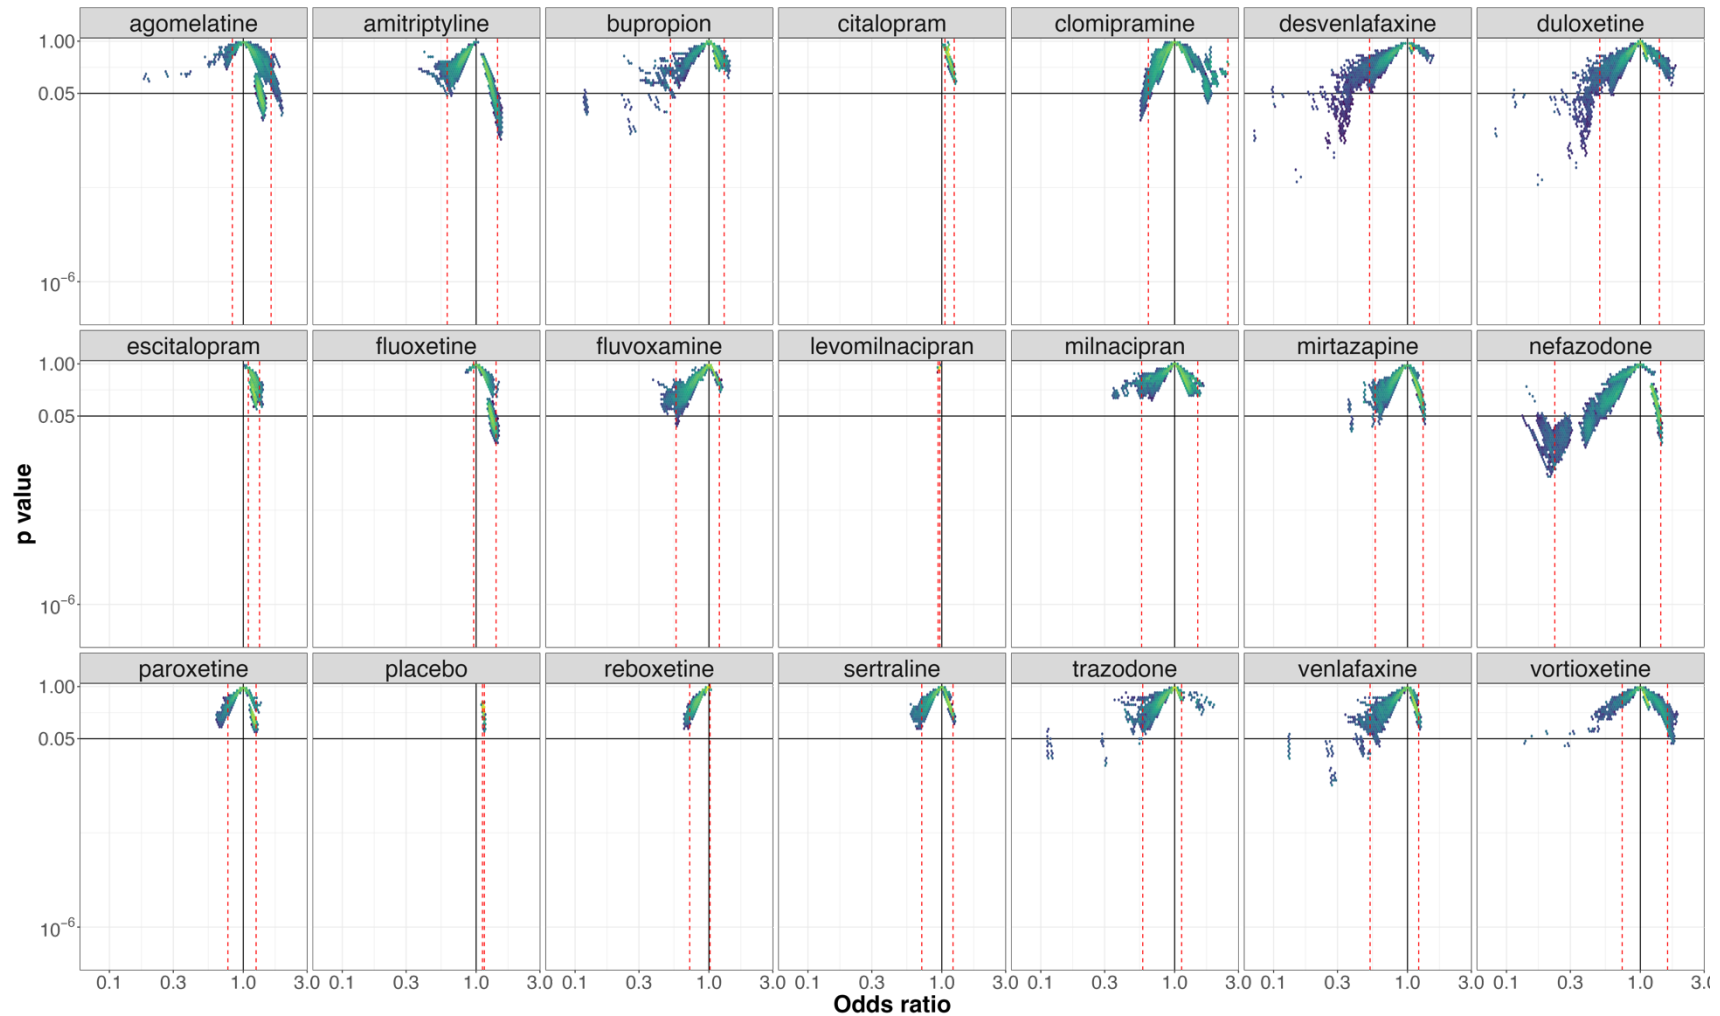

**e-figure 42:** *Vibration of effects for treatment discontinuation for the comparisons of vilazodone with the 20 remaining antidepressants and placebo (with the number of patients included in the most complete network for this comparison). An Odds ratio >1 favors vilazodone. The colors indicate the log densities of network meta-analyses (yellow: high, green: moderate, blue: low). Dotted red lines illustrate the 1<sup>st</sup> and 99<sup>th</sup> percentiles.*

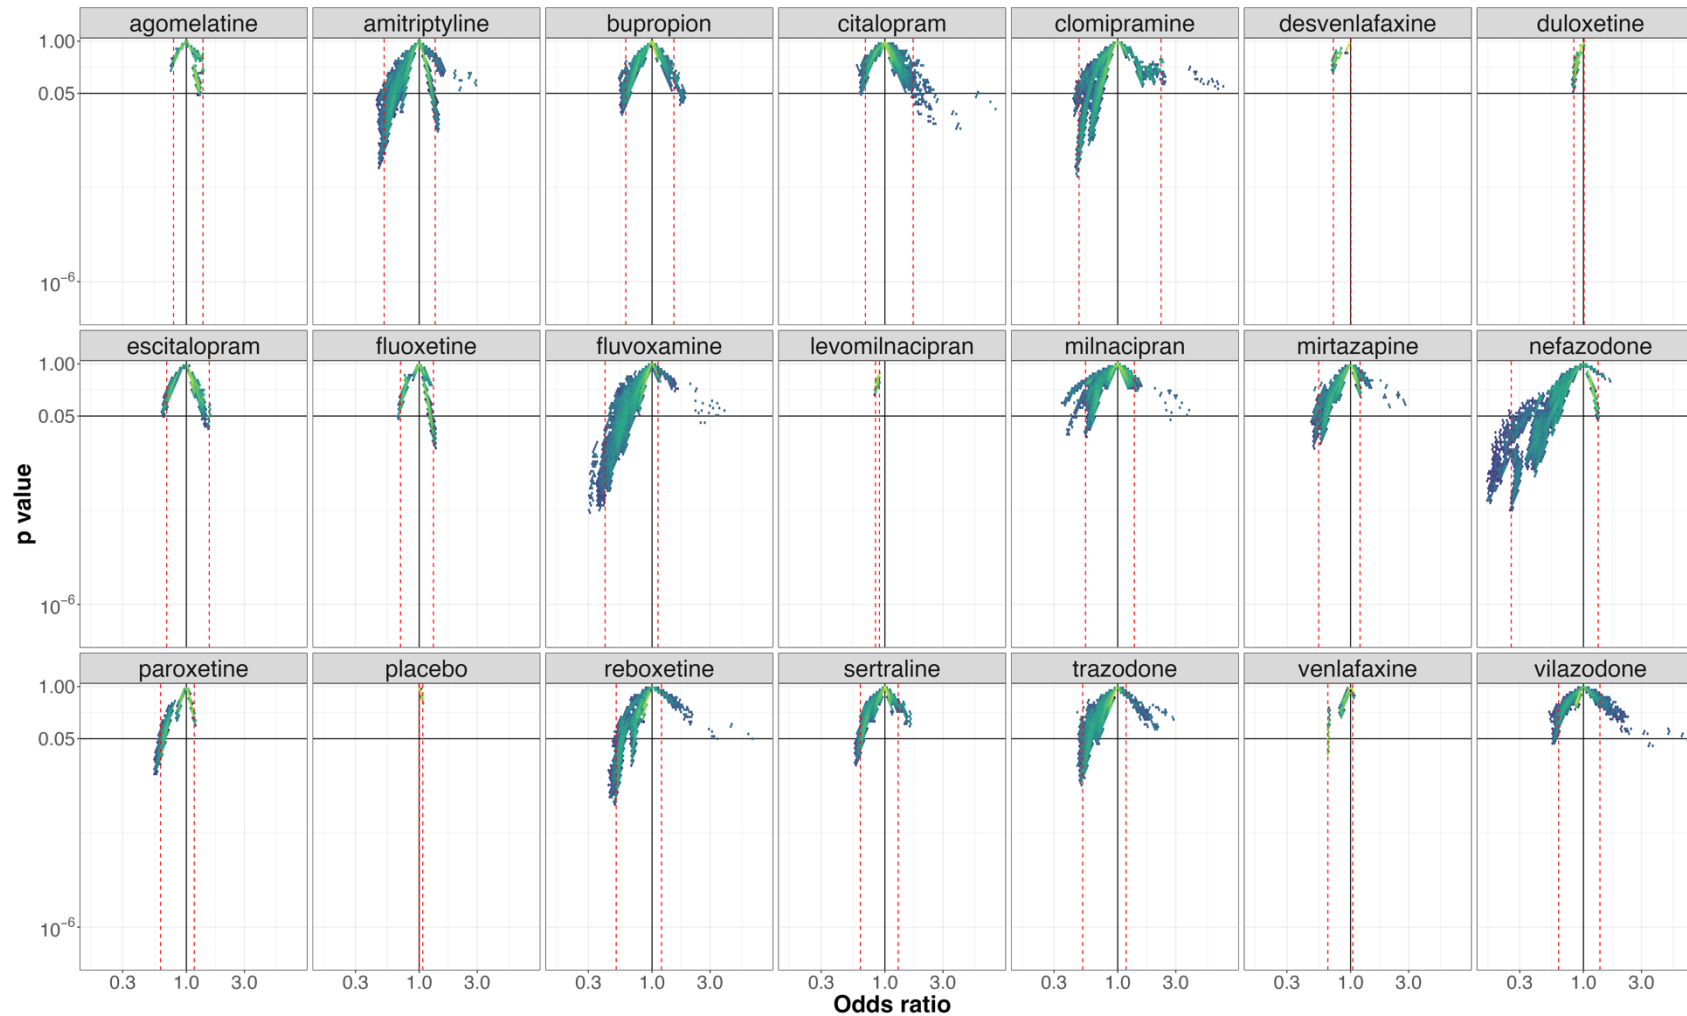

**e-figure 43:** *Vibration of effects for treatment discontinuation for the comparisons of vortioxetine with the 20 remaining antidepressants and placebo (with the number of patients included in the most complete network for this comparison). An Odds ratio >1 favors vortioxetine. The colors indicate the log densities of network meta-analyses (yellow: high, green: moderate, blue: low). Dotted red lines illustrate the 1<sup>st</sup> and 99<sup>th</sup> percentiles.*

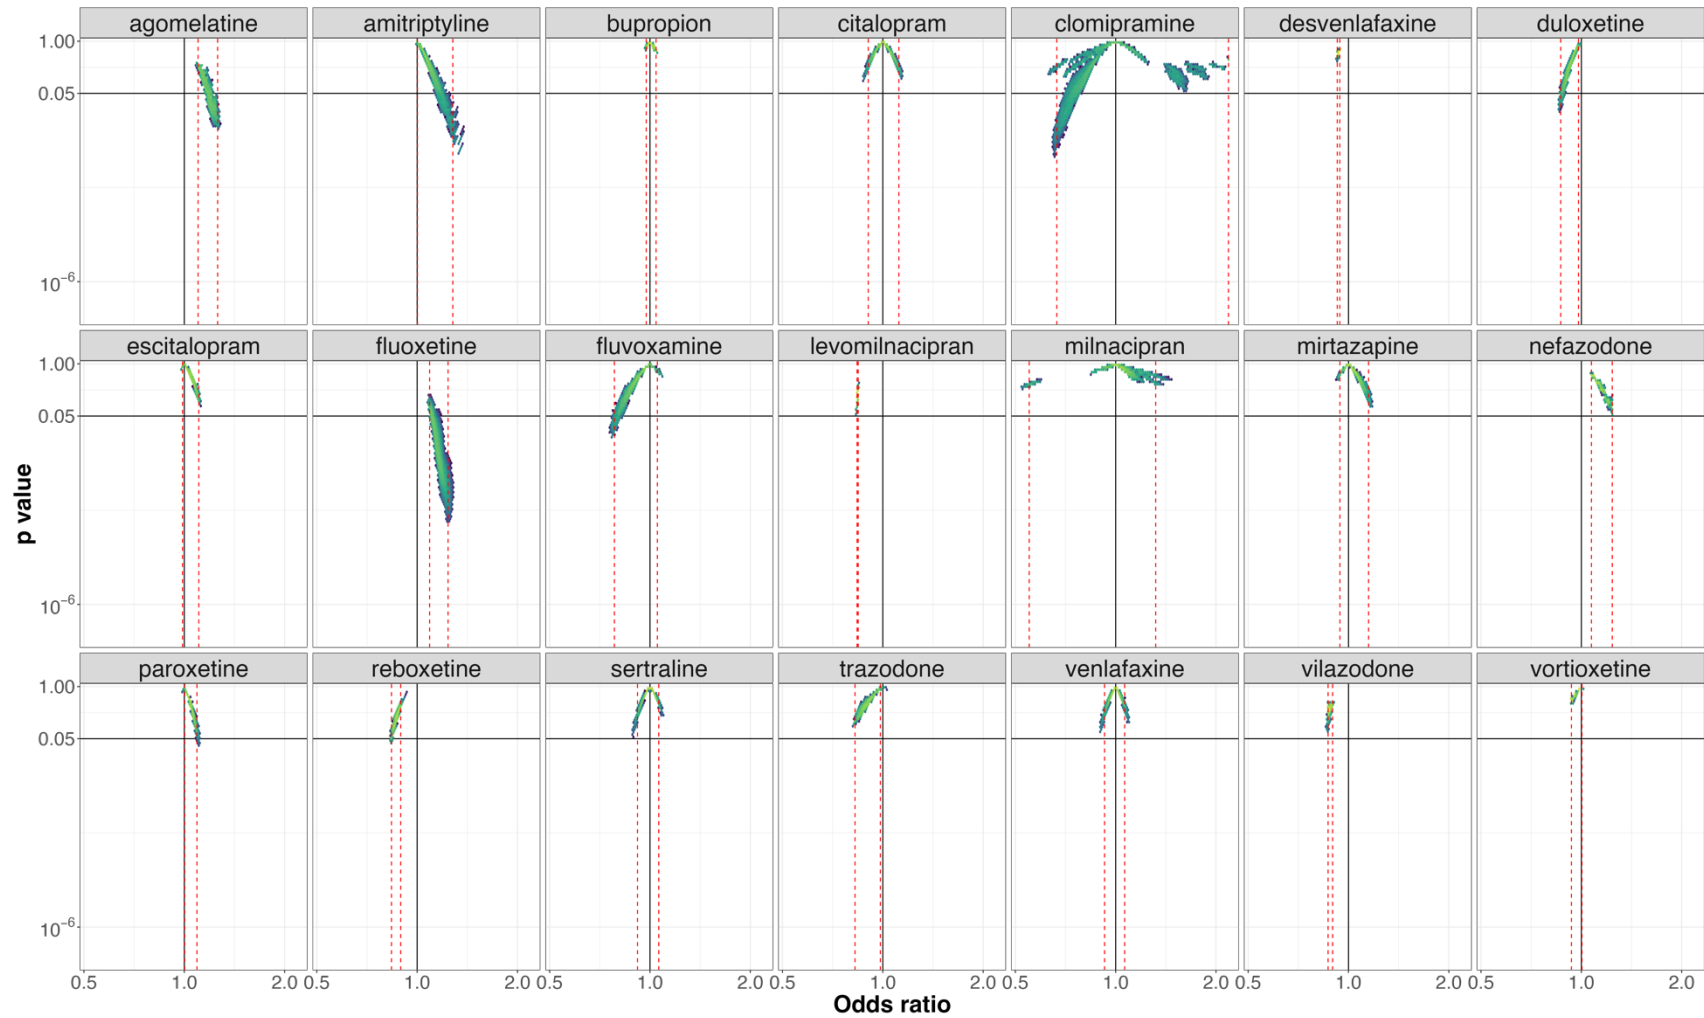

**e-figure 44:** *Vibration of effects for treatment discontinuation for the comparisons of placebo with the 21 antidepressants (with the number of patients included in the most complete network for this comparison). An Odds ratio >1 favors placebo. The colors indicate the log densities of network meta-analyses (yellow: high, green: moderate, blue: low). Dotted red lines illustrate the 1<sup>st</sup> and 99<sup>th</sup> percentiles.*

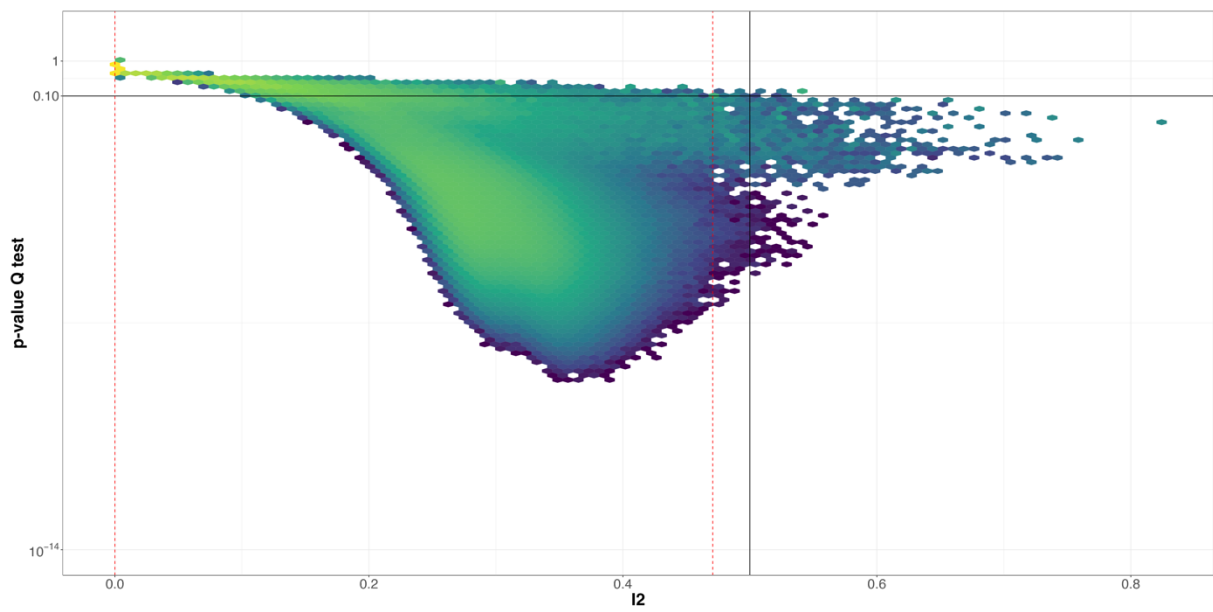

**e-figure 45:** *Vibration of effects for heterogeneity for NMAs.  $I^2 > 0.5$  indicates a high level of heterogeneity. The colors indicate the log densities of network meta-analyses (yellow: high, green: moderate, blue: low) for the outcome treatment discontinuation.*



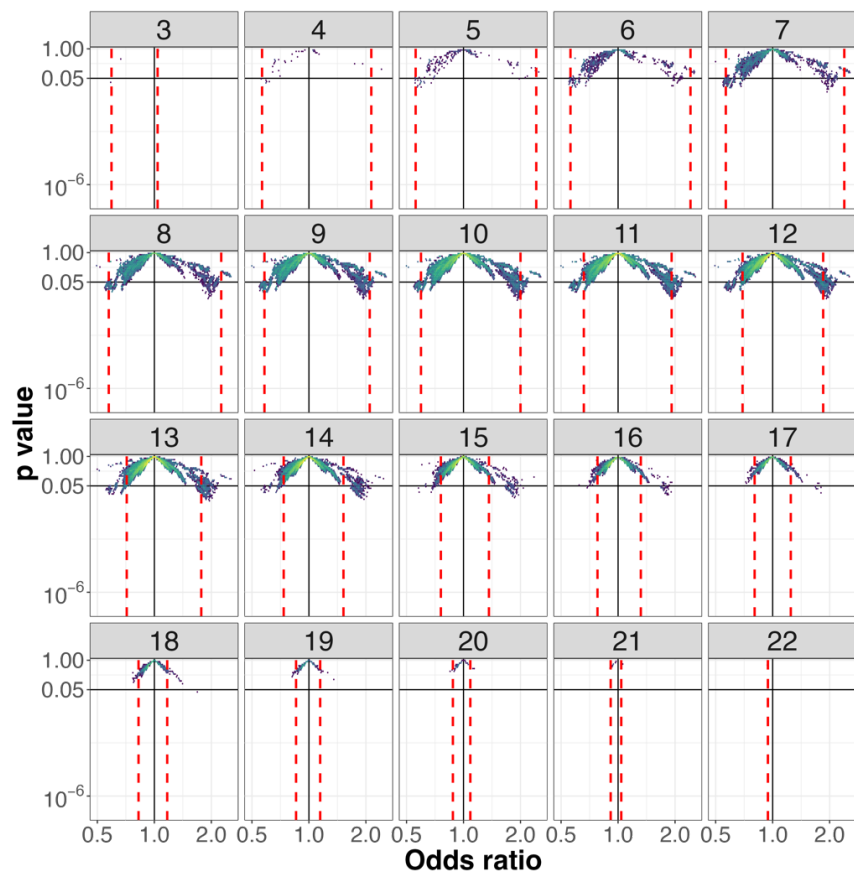

**e-figure 46:** *Vibration of effects for treatment response for the comparisons of clomipramine with agomelatine depending on the number of treatments included in the NMA. An Odds ratio >1 favors agomelatine. The Colors indicate the log densities of network meta-analyses (yellow: high, green: moderate, blue: low) Dotted red lines illustrate the 1st and 99th percentiles.*

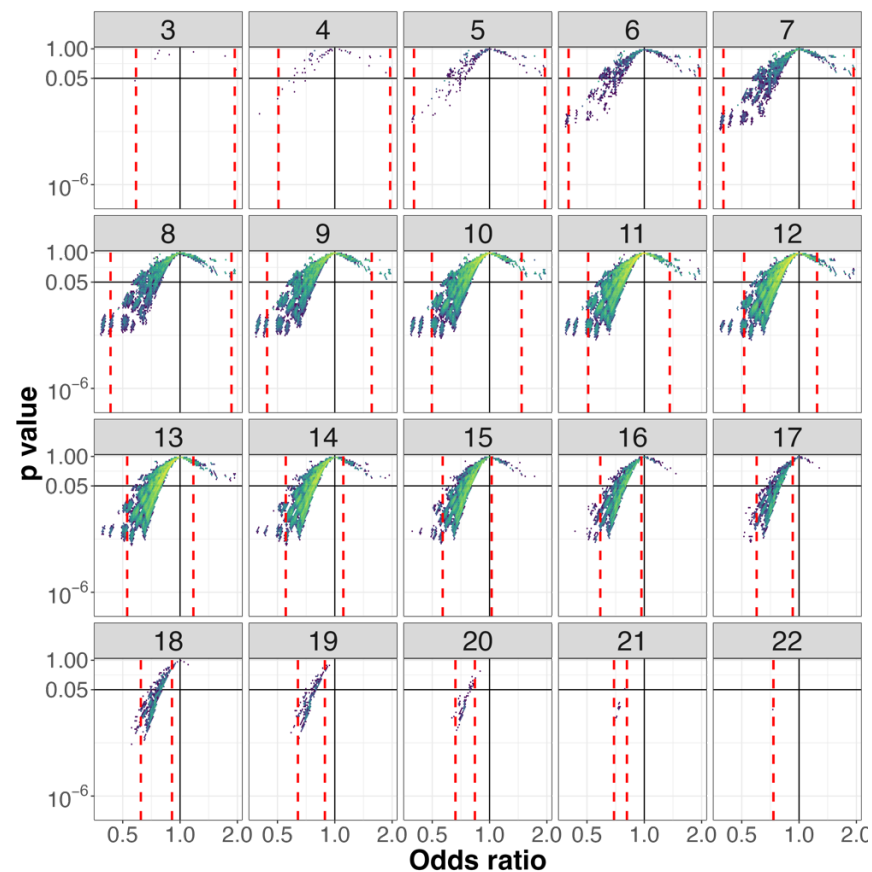

**e-figure 47:** *Vibration of effects for treatment response for the comparisons of clomipramine with amitriptyline depending on the number of treatments included in the NMA. An Odds ratio >1 favors amitriptyline. The Colors indicate the log densities of network meta-analyses (yellow: high, green: moderate, blue: low) Dotted red lines illustrate the 1st and 99th percentiles.*

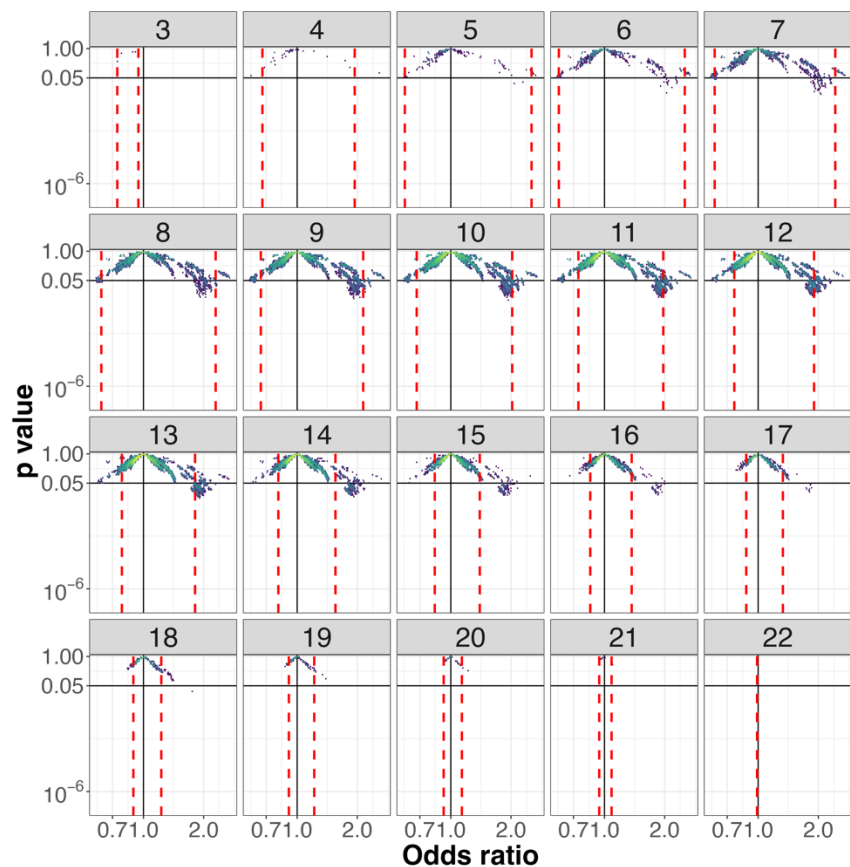

**e-figure 48:** *Vibration of effects for treatment response for the comparisons of clomipramine with bupropion depending on the number of treatments included in the NMA. An Odds ratio >1 favors bupropion. The Colors indicate the log densities of network meta-analyses (yellow: high, green: moderate, blue: low) Dotted red lines illustrate the 1st and 99th percentiles.*

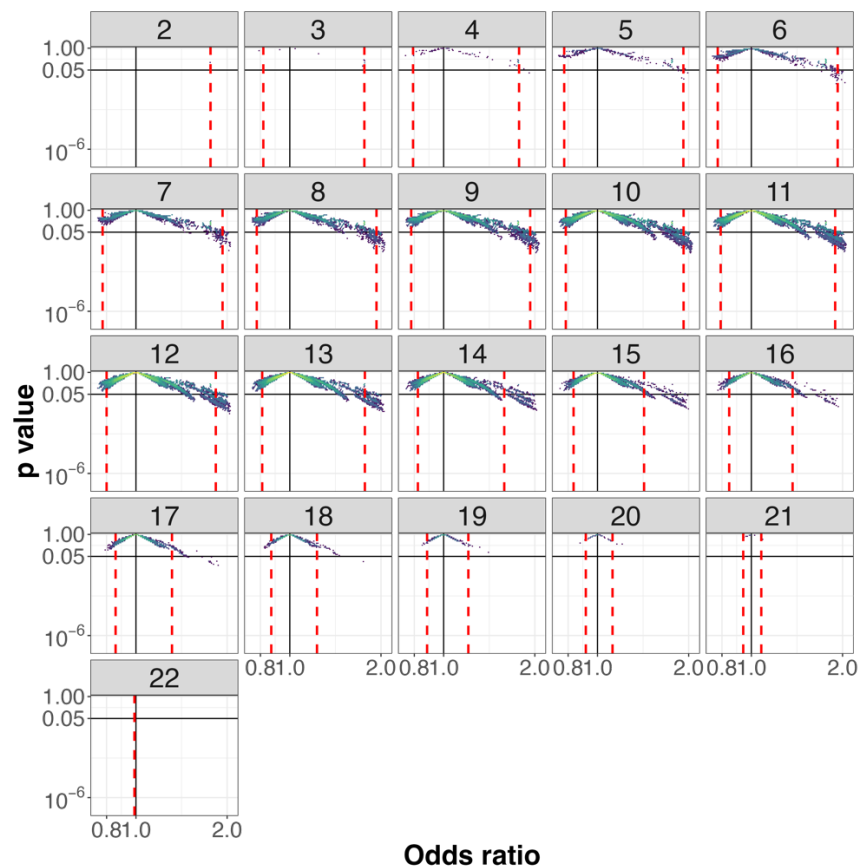

**e-figure 49:** *Vibration of effects for treatment response for the comparisons of clomipramine with citalopram depending on the number of treatments included in the NMA. An Odds ratio >1 favors citalopram. The Colors indicate the log densities of network meta-analyses (yellow: high, green: moderate, blue: low) Dotted red lines illustrate the 1st and 99th percentiles.*

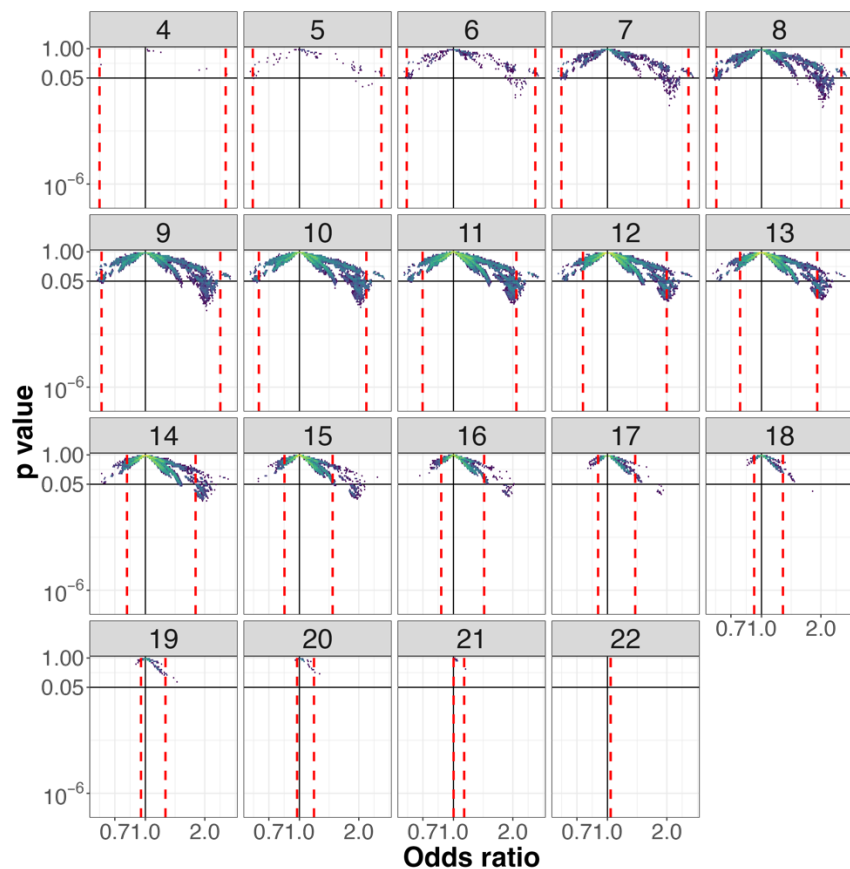

**e-figure 50:** Vibration of effects for treatment response for the comparisons of clomipramine with desvenlafaxine depending on the number of treatments included in the NMA. An Odds ratio  $>1$  favors desvenlafaxine. The Colors indicate the log densities of network meta-analyses (yellow: high, green: moderate, blue: low) Dotted red lines illustrate the 1st and 99th percentiles.

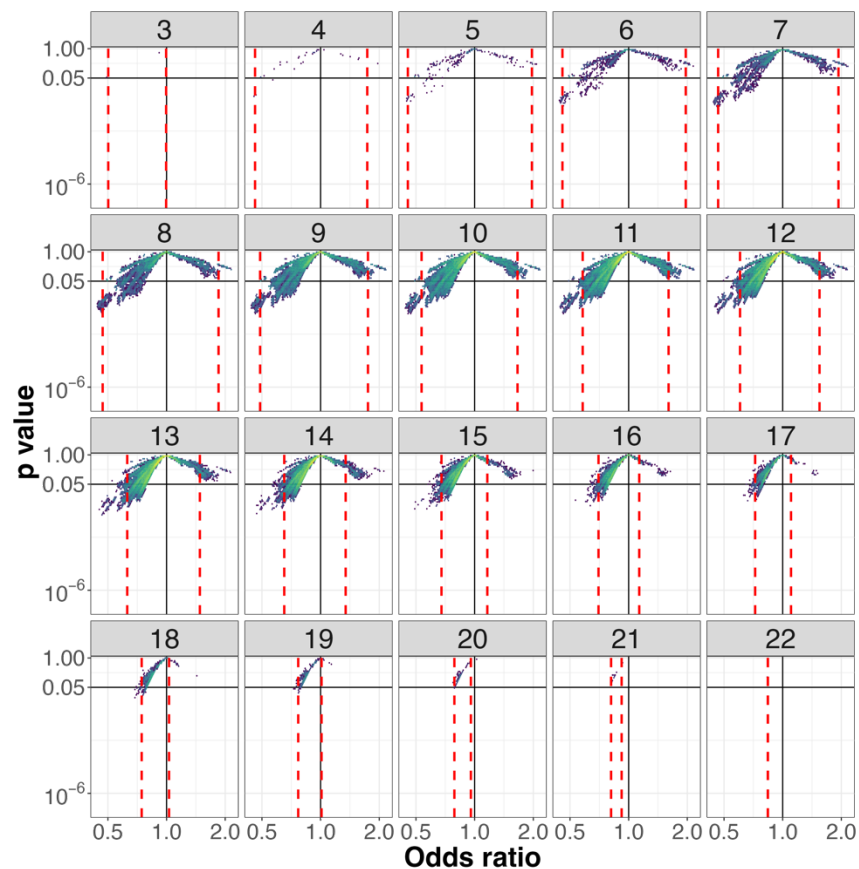

**e-figure 51:** Vibration of effects for treatment response for the comparisons of clomipramine with duloxetine depending on the number of treatments included in the NMA. An Odds ratio  $>1$  favors duloxetine. The Colors indicate the log densities of network meta-analyses (yellow: high, green: moderate, blue: low) Dotted red lines illustrate the 1st and 99th percentiles.

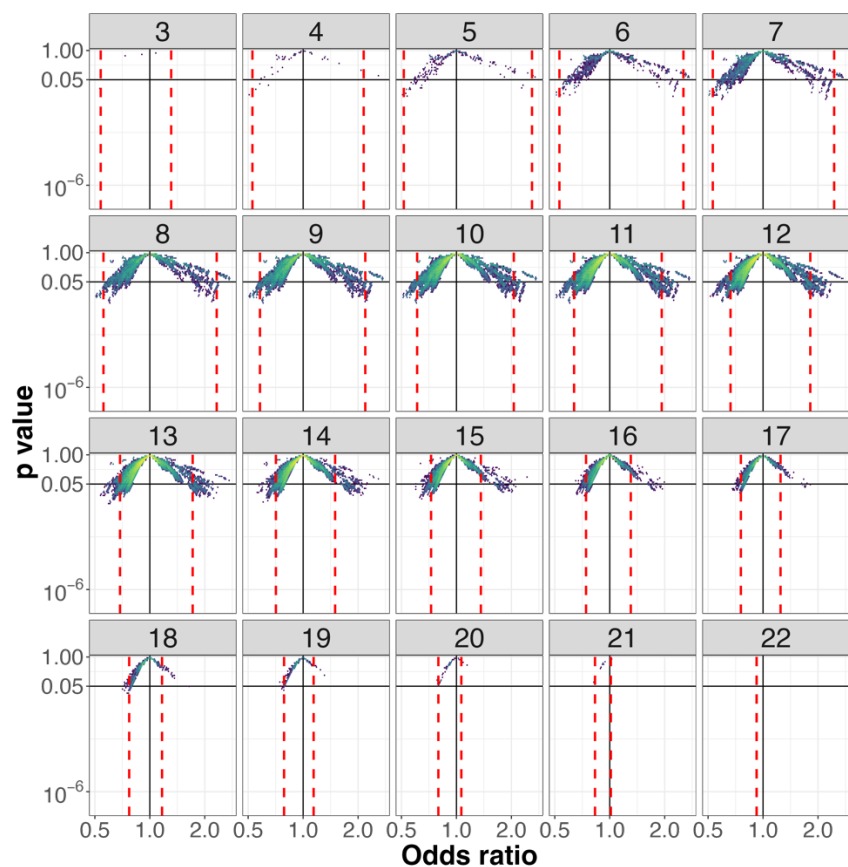

**e-figure 52:** *Vibration of effects for treatment response for the comparisons of clomipramine with escitalopram depending on the number of treatments included in the NMA. An Odds ratio >1 favors escitalopram. The Colors indicate the log densities of network meta-analyses (yellow: high, green: moderate, blue: low) Dotted red lines illustrate the 1st and 99th percentiles.*

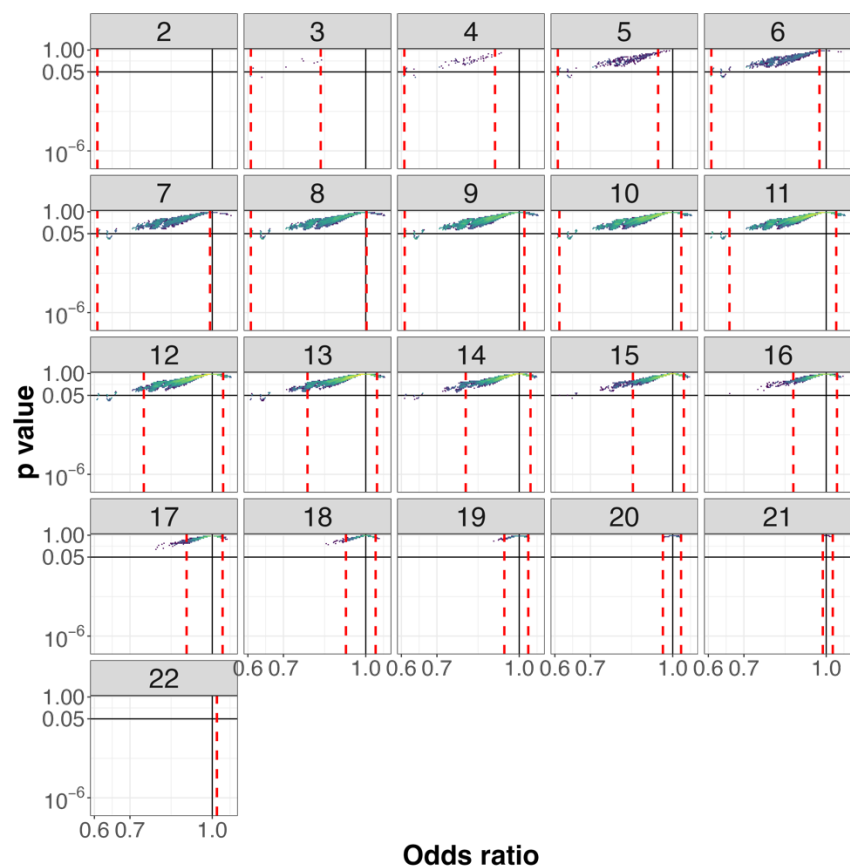

**e-figure 53:** *Vibration of effects for treatment response for the comparisons of clomipramine with fluoxetine depending on the number of treatments included in the NMA. An Odds ratio >1 favors fluoxetine. The Colors indicate the log densities of network meta-analyses (yellow: high, green: moderate, blue: low) Dotted red lines illustrate the 1st and 99th percentiles.*

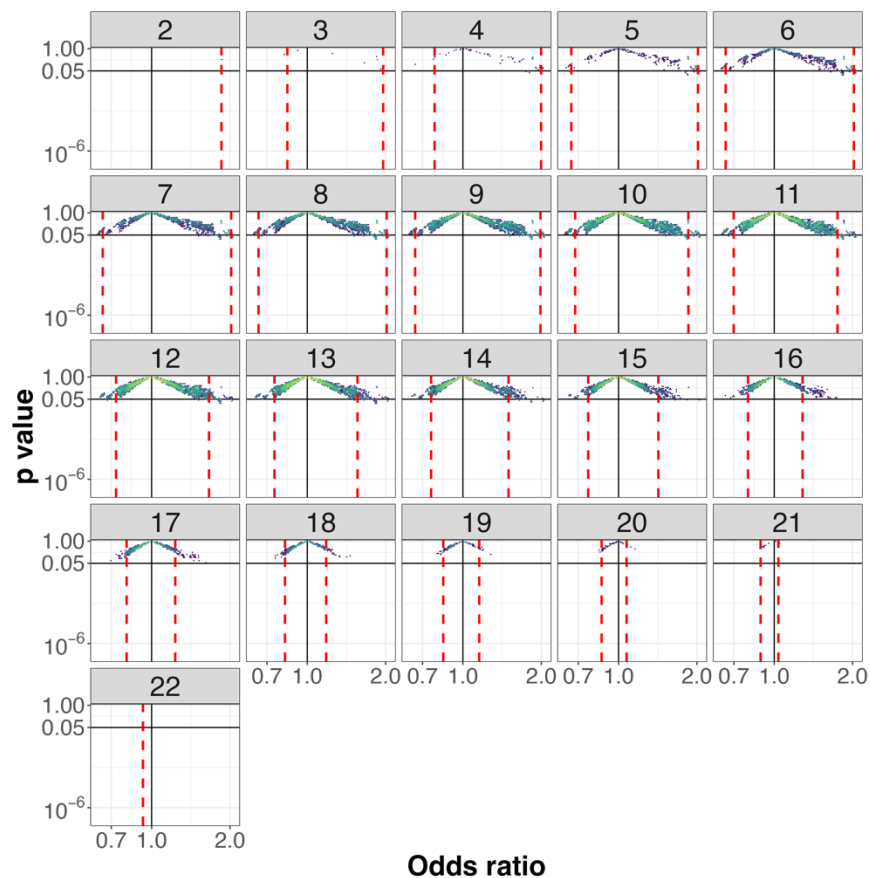

**e-figure 54:** Vibration of effects for treatment response for the comparisons of clomipramine with fluvoxamine depending on the number of treatments included in the NMA. An Odds ratio  $>1$  favors fluvoxamine. The Colors indicate the log densities of network meta-analyses (yellow: high, green: moderate, blue: low) Dotted red lines illustrate the 1st and 99th percentiles.

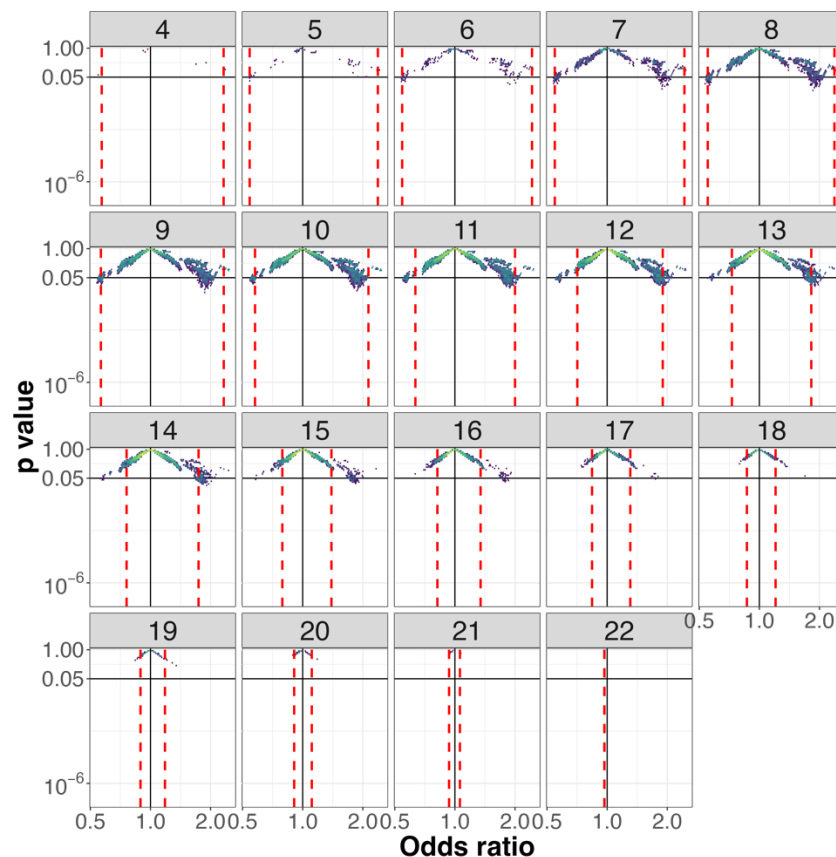

**e-figure 55:** Vibration of effects for treatment response for the comparisons of clomipramine with levomilnacipran depending on the number of treatments included in the NMA. An Odds ratio  $>1$  favors levomilnacipran. The Colors indicate the log densities of network meta-analyses (yellow: high, green: moderate, blue: low) Dotted red lines illustrate the 1st and 99th percentiles.

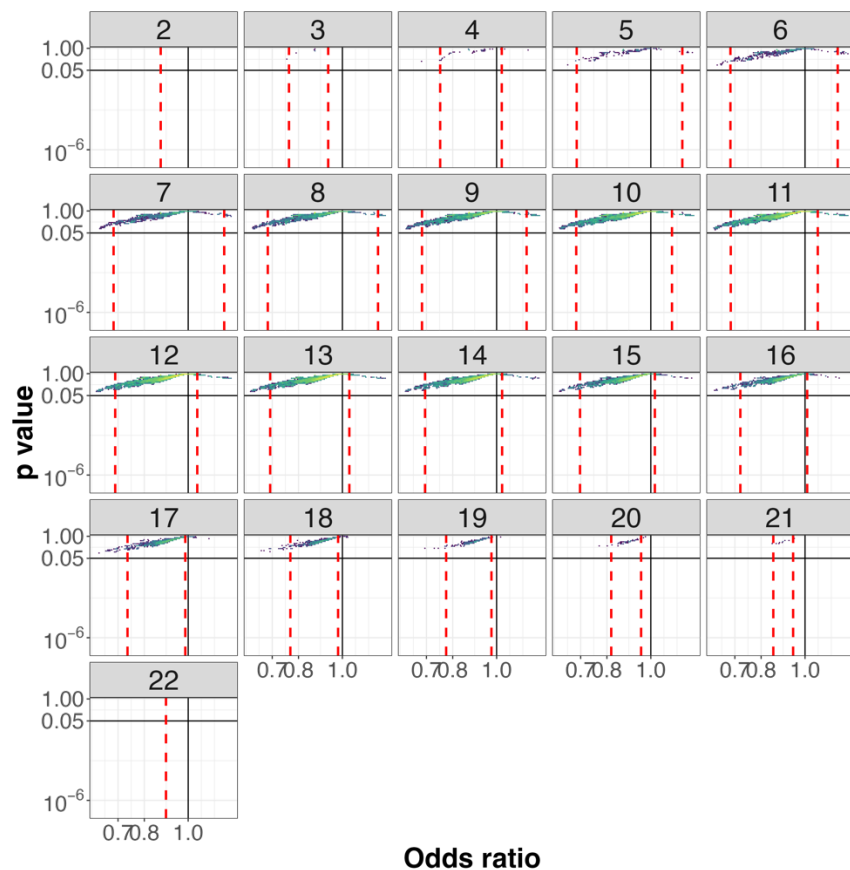

**e-figure 56:** *Vibration of effects for treatment response for the comparisons of clomipramine with milnacipran depending on the number of treatments included in the NMA. An Odds ratio >1 favors milnacipran. The Colors indicate the log densities of network meta-analyses (yellow: high, green: moderate, blue: low) Dotted red lines illustrate the 1st and 99th percentiles.*

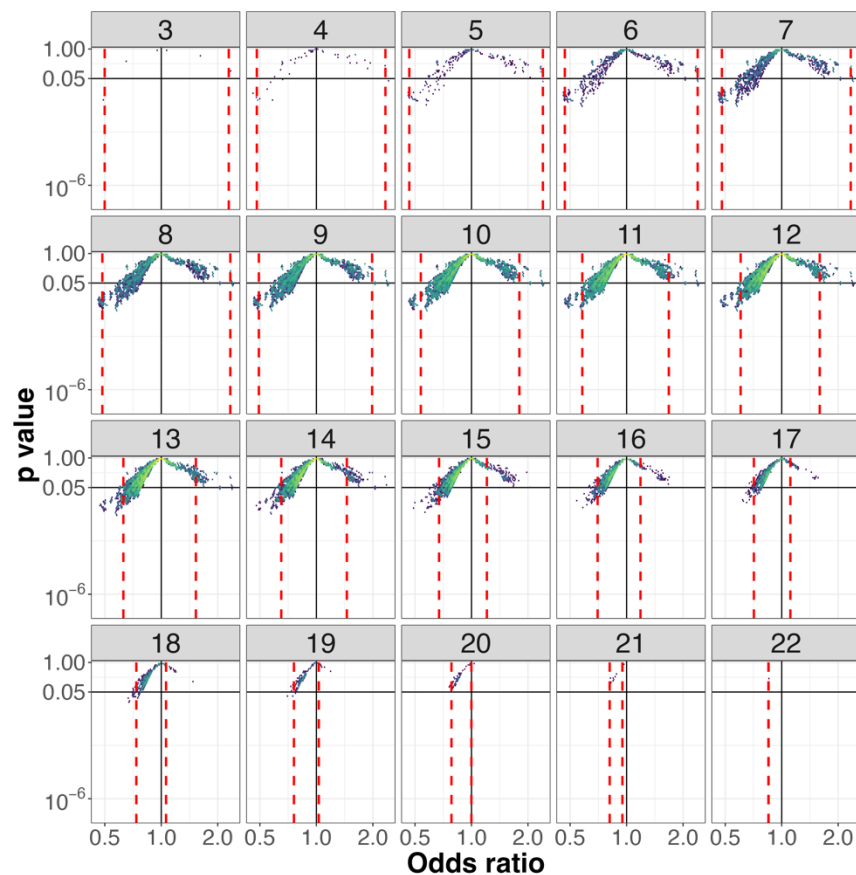

**e-figure 57:** *Vibration of effects for treatment response for the comparisons of clomipramine with mirtazapine depending on the number of treatments included in the NMA. An Odds ratio >1 favors mirtazapine. The Colors indicate the log densities of network meta-analyses (yellow: high, green: moderate, blue: low) Dotted red lines illustrate the 1st and 99th percentiles.*

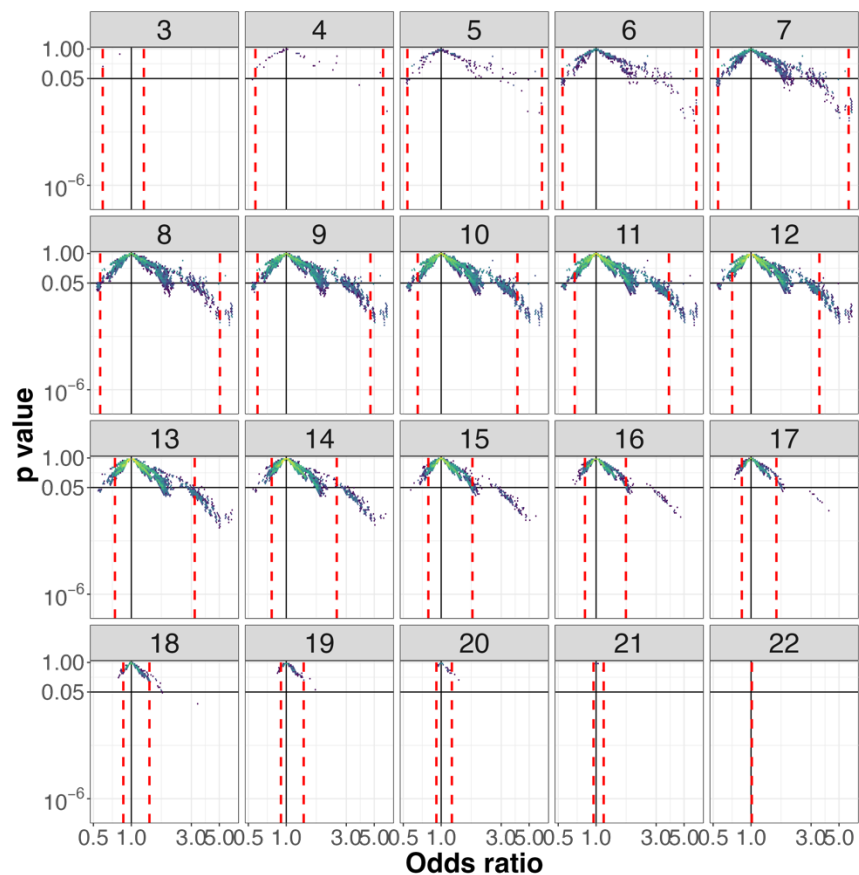

**e-figure 58:** *Vibration of effects for treatment response for the comparisons of clomipramine with nefazodone depending on the number of treatments included in the NMA. An Odds ratio >1 favors nefazodone. The Colors indicate the log densities of network meta-analyses (yellow: high, green: moderate, blue: low) Dotted red lines illustrate the 1st and 99th percentiles.*

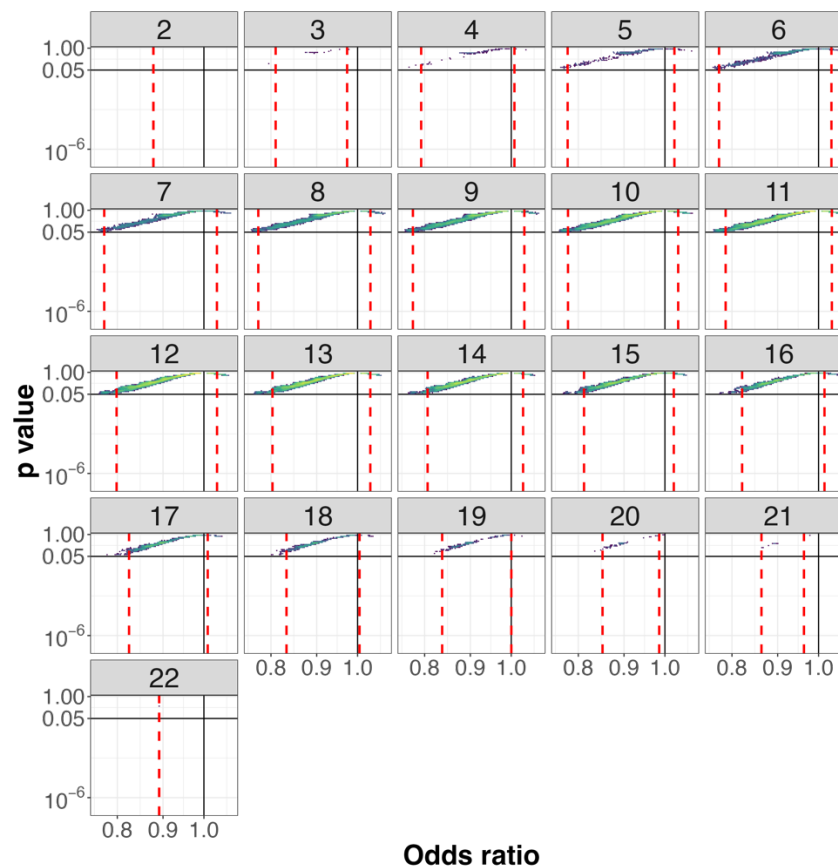

**e-figure 59:** *Vibration of effects for treatment response for the comparisons of clomipramine with paroxetine depending on the number of treatments included in the NMA. An Odds ratio >1 favors paroxetine. The Colors indicate the log densities of network meta-analyses (yellow: high, green: moderate, blue: low) Dotted red lines illustrate the 1st and 99th percentiles.*

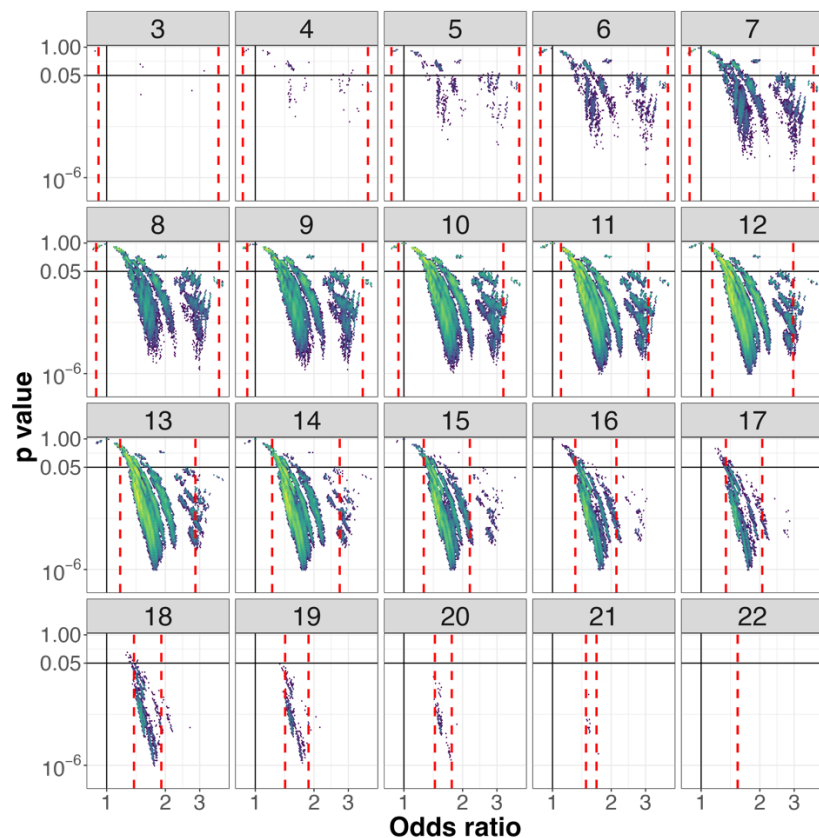

**e-figure 60:** *Vibration of effects for treatment response for the comparisons of clomipramine with placebo depending on the number of treatments included in the NMA. An Odds ratio >1 favors placebo. The Colors indicate the log densities of network meta-analyses (yellow: high, green: moderate, blue: low) Dotted red lines illustrate the 1st and 99th percentiles.*

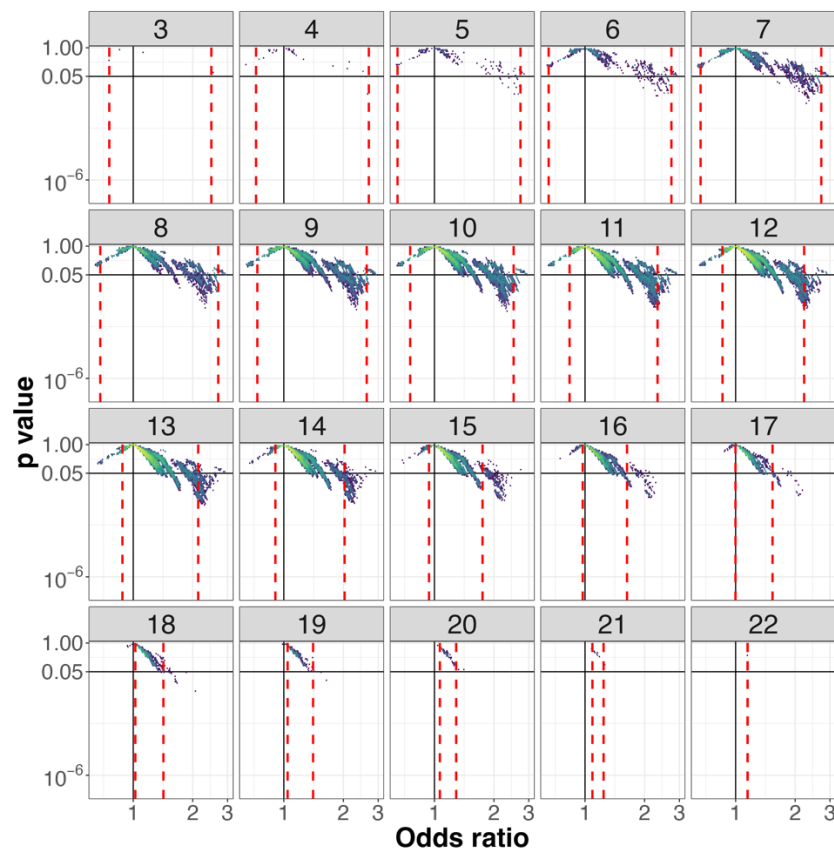

**e-figure 61:** *Vibration of effects for treatment response for the comparisons of clomipramine with reboxetine depending on the number of treatments included in the NMA. An Odds ratio >1 favors reboxetine. The Colors indicate the log densities of network meta-analyses (yellow: high, green: moderate, blue: low) Dotted red lines illustrate the 1st and 99th percentiles.*



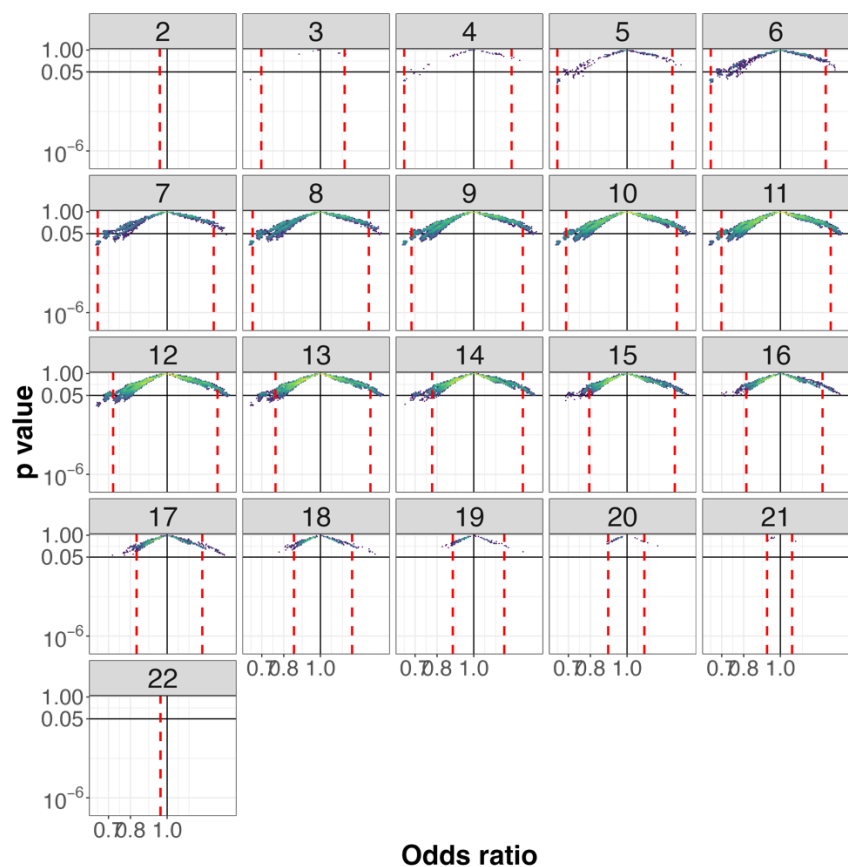

**e-figure 62:** Vibration of effects for treatment response for the comparisons of clomipramine with sertraline depending on the number of treatments included in the NMA. An Odds ratio  $>1$  favors sertraline. The Colors indicate the log densities of network meta-analyses (yellow: high, green: moderate, blue: low) Dotted red lines illustrate the 1st and 99th percentiles.

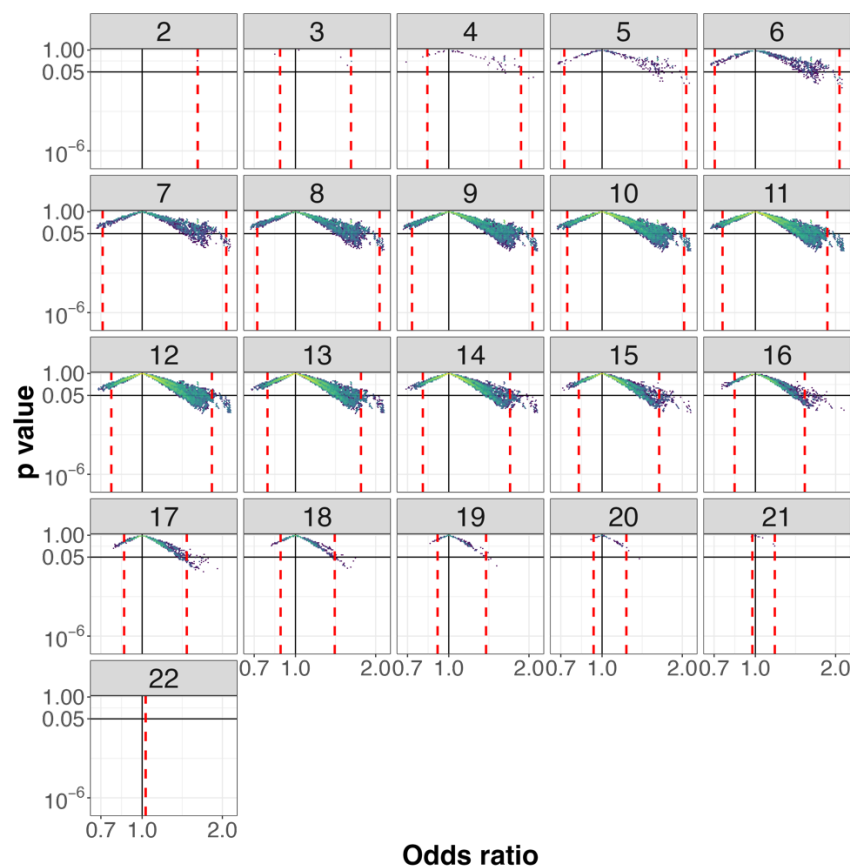

**e-figure 63:** Vibration of effects for treatment response for the comparisons of clomipramine with trazodone depending on the number of treatments included in the NMA. An Odds ratio  $>1$  favors trazodone. The Colors indicate the log densities of network meta-analyses (yellow: high, green: moderate, blue: low) Dotted red lines illustrate the 1st and 99th percentiles.

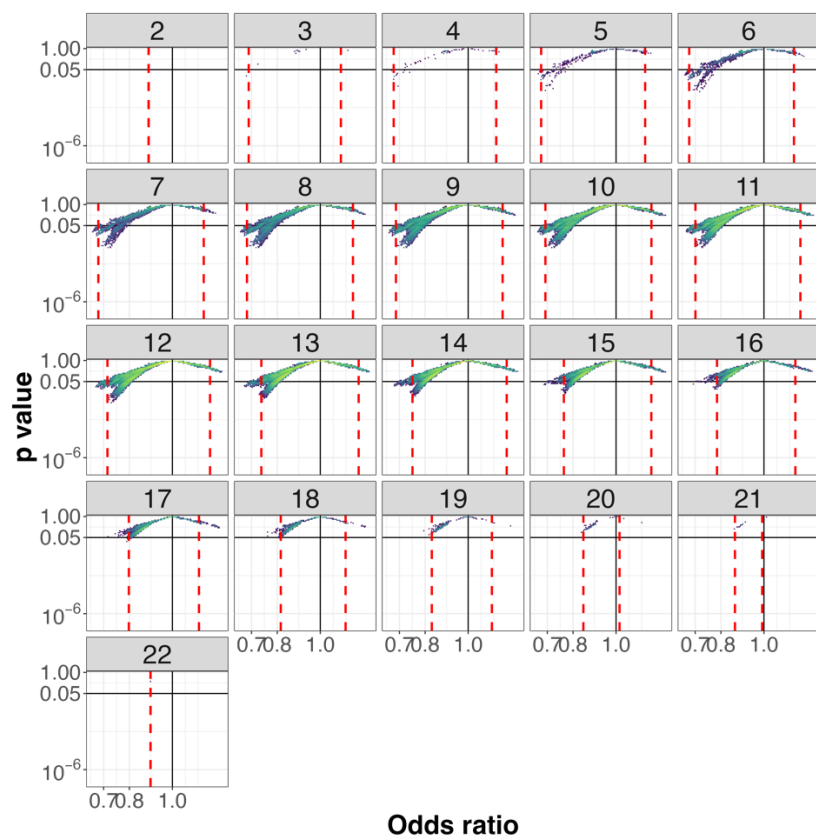

**e-figure 64:** Vibration of effects for treatment response for the comparisons of clomipramine with venlafaxine depending on the number of treatments included in the NMA. An Odds ratio  $>1$  favors venlafaxine. The Colors indicate the log densities of network meta-analyses (yellow: high, green: moderate, blue: low) Dotted red lines illustrate the 1st and 99th percentiles.

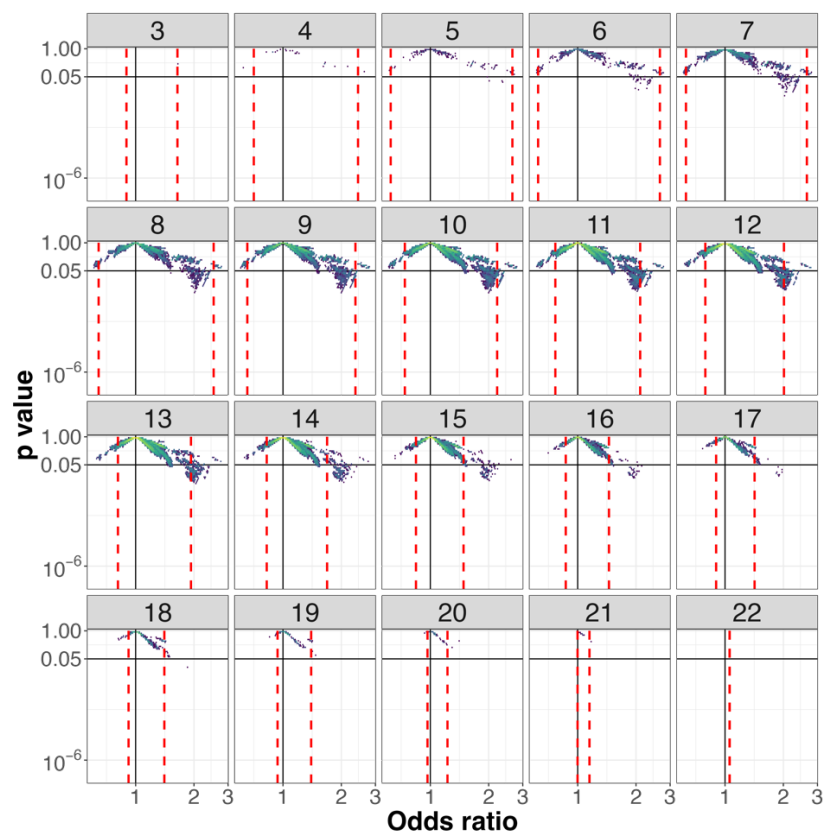

**e-figure 65:** Vibration of effects for treatment response for the comparisons of clomipramine with vilazodone depending on the number of treatments included in the NMA. An Odds ratio  $>1$  favors vilazodone. The Colors indicate the log densities of network meta-analyses (yellow: high, green: moderate, blue: low) Dotted red lines illustrate the 1st and 99th percentiles.

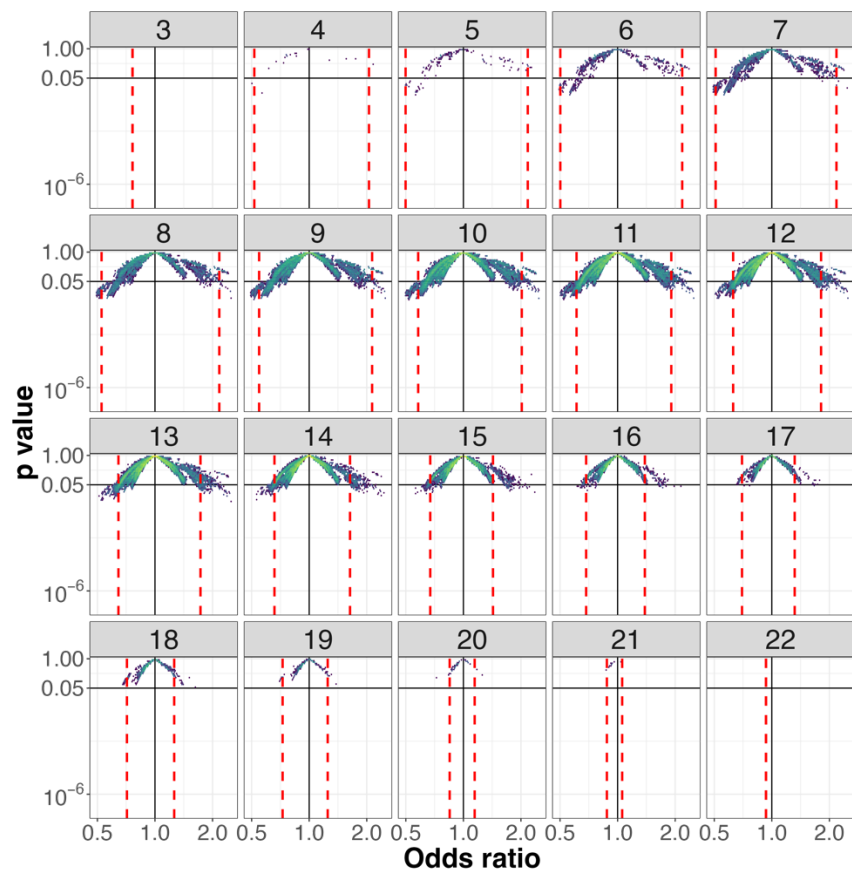

*e-figure 66: Vibration of effects for treatment response for the comparisons of clomipramine with vortioxetine depending on the number of treatments included in the NMA. An Odds ratio >1 favors vortioxetine. The Colors indicate the log densities of network meta-analyses (yellow: high, green: moderate, blue: low) Dotted red lines illustrate the 1st and 99th percentiles.*

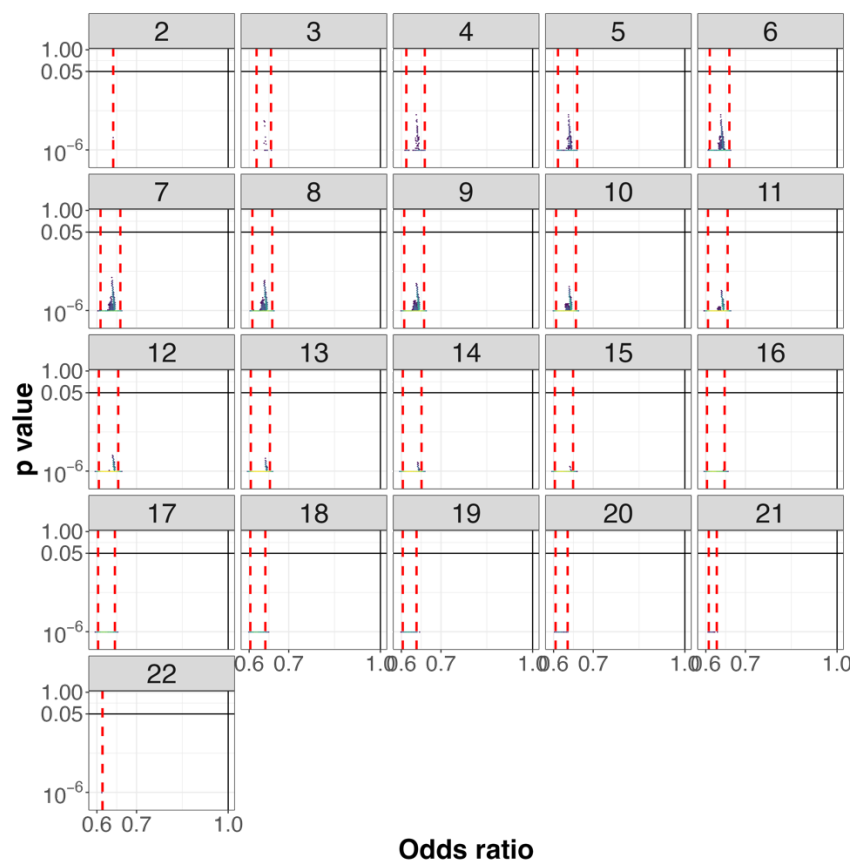

**e-figure 67:** Vibration of effects for treatment response for the comparisons of placebo with agomelatine depending on the number of treatments included in the NMA. An Odds ratio  $>1$  favors agomelatine. The Colors indicate the log densities of network meta-analyses (yellow: high, green: moderate, blue: low) Dotted red lines illustrate the 1st and 99th percentiles.

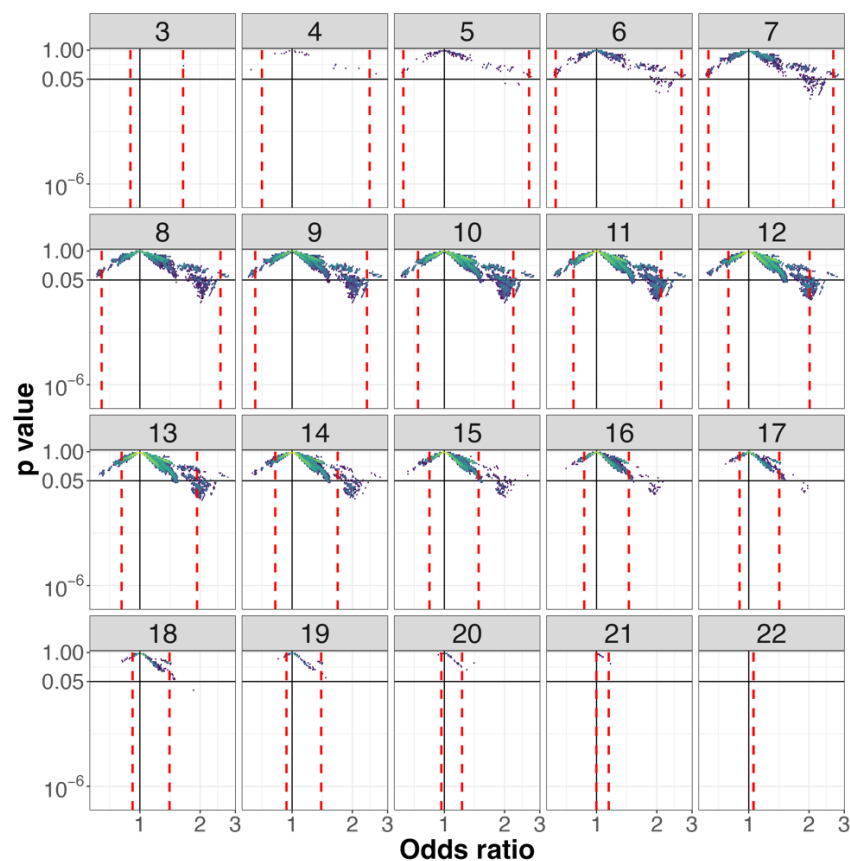

**e-figure 68:** Vibration of effects for treatment response for the comparisons of placebo with amitryptiline depending on the number of treatments included in the NMA. An Odds ratio  $>1$  favors amitryptiline. The Colors indicate the log densities of network meta-analyses (yellow: high, green: moderate, blue: low) Dotted red lines illustrate the 1st and 99th percentiles.

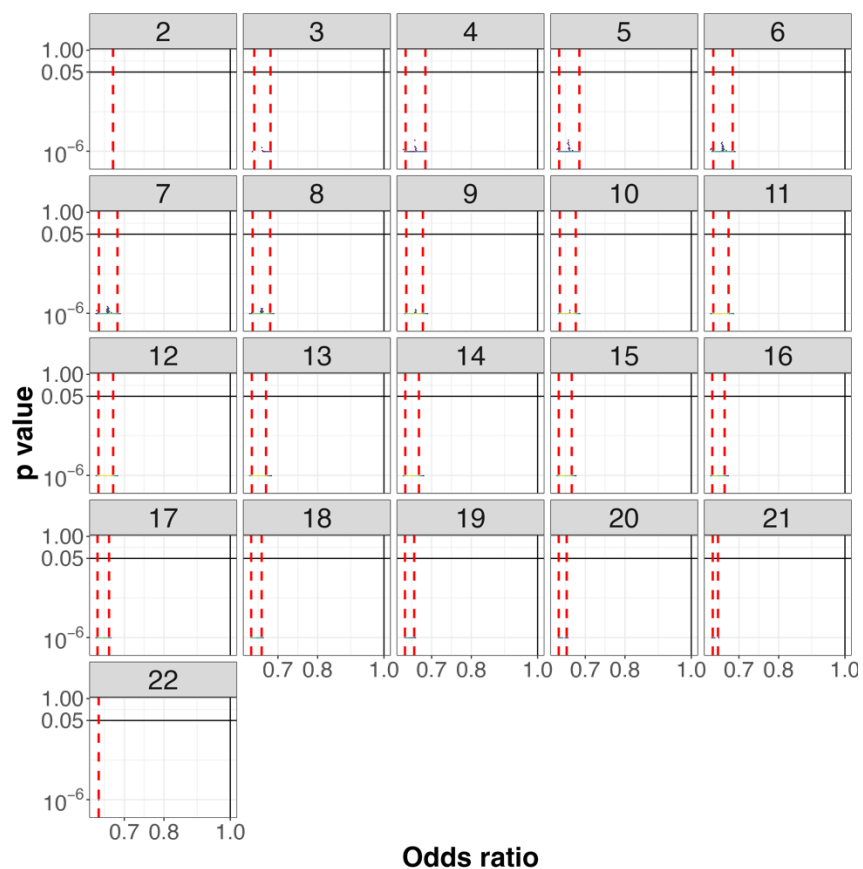

**e-figure 69:** Vibration of effects for treatment response for the comparisons of placebo with bupropion depending on the number of treatments included in the NMA. An Odds ratio >1 favors bupropion. The Colors indicate the log densities of network meta-analyses (yellow: high, green: moderate, blue: low) Dotted red lines illustrate the 1st and 99th percentiles.

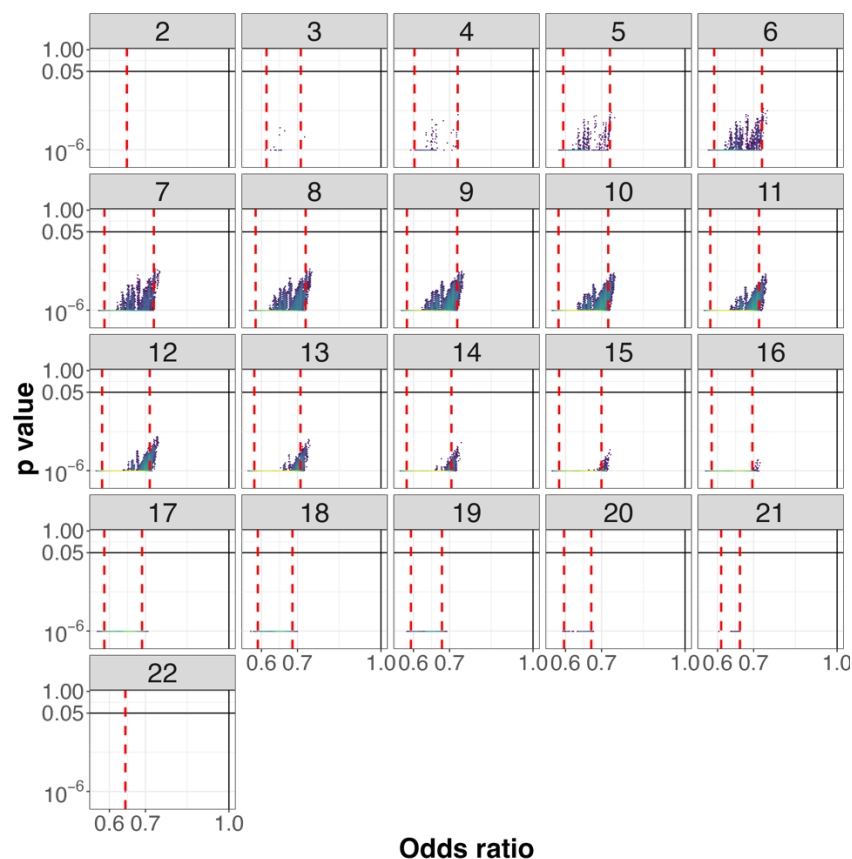

**e-figure 70:** Vibration of effects for treatment response for the comparisons of placebo with citalopram depending on the number of treatments included in the NMA. An Odds ratio >1 favors citalopram. The Colors indicate the log densities of network meta-analyses (yellow: high, green: moderate, blue: low) Dotted red lines illustrate the 1st and 99th percentiles.

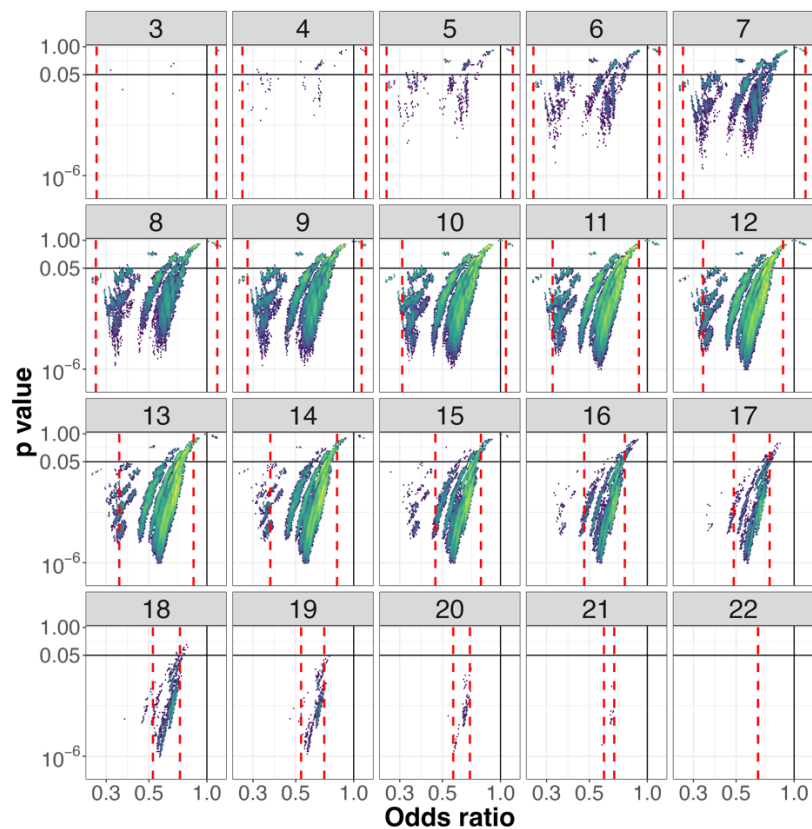

**e-figure 71:** Vibration of effects for treatment response for the comparisons of placebo with clomipramine depending on the number of treatments included in the NMA. An Odds ratio  $>1$  favors clomipramine. The Colors indicate the log densities of network meta-analyses (yellow: high, green: moderate, blue: low) Dotted red lines illustrate the 1st and 99th percentiles.

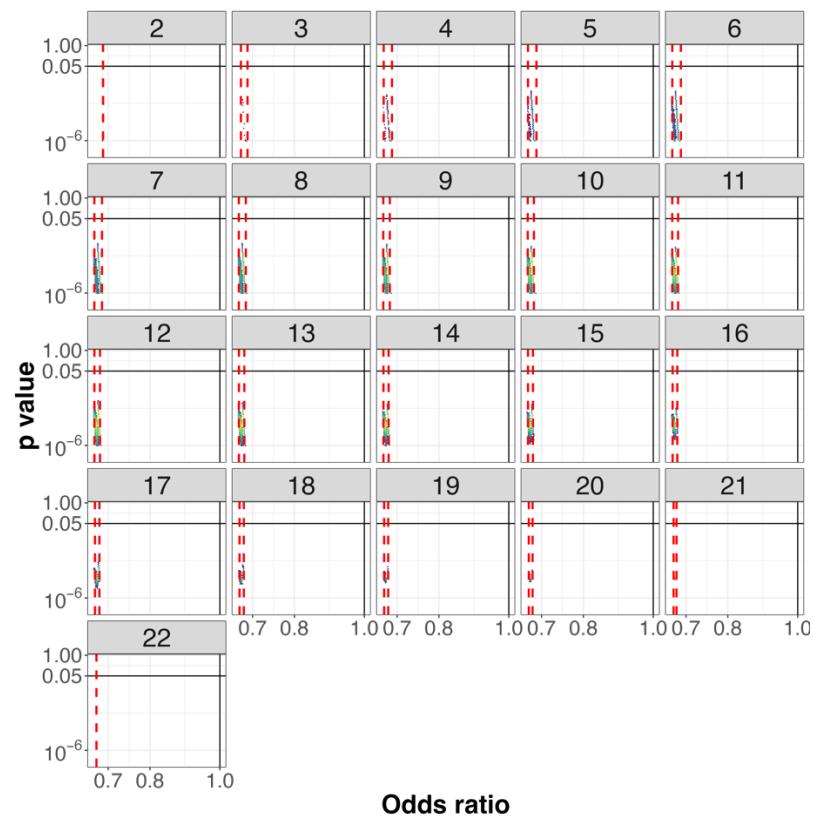

**e-figure 72:** Vibration of effects for treatment response for the comparisons of placebo with desvenlafaxine depending on the number of treatments included in the NMA. An Odds ratio  $>1$  favors desvenlafaxine. The Colors indicate the log densities of network meta-analyses (yellow: high, green: moderate, blue: low) Dotted red lines illustrate the 1st and 99th percentiles.

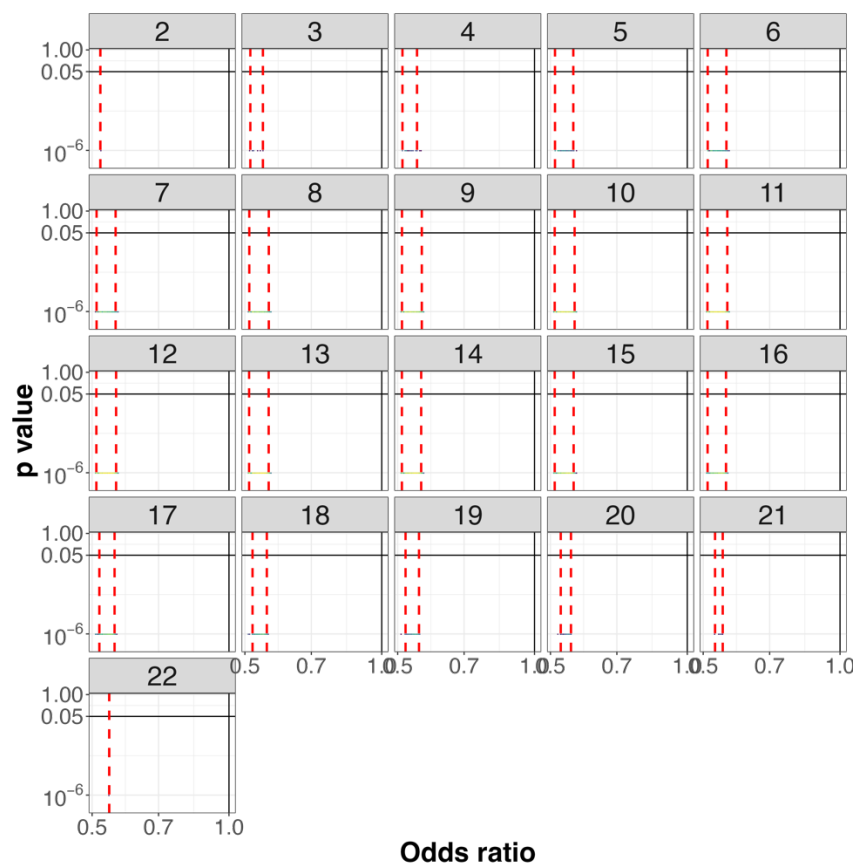

Odds ratio

**e-figure 73:** Vibration of effects for treatment response for the comparisons of placebo with duloxetine depending on the number of treatments included in the NMA. An Odds ratio  $>1$  favors duloxetine. The Colors indicate the log densities of network meta-analyses (yellow: high, green: moderate, blue: low) Dotted red lines illustrate the 1st and 99th percentiles.

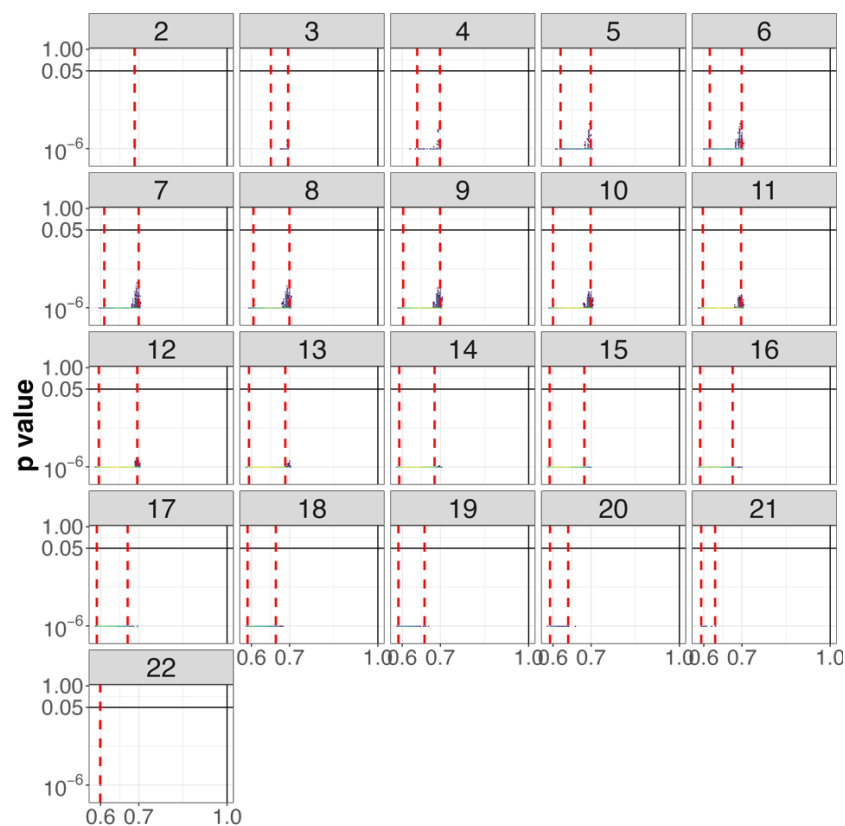

Odds ratio

**e-figure 74:** Vibration of effects for treatment response for the comparisons of placebo with escitalopram depending on the number of treatments included in the NMA. An Odds ratio  $>1$  favors escitalopram. The Colors indicate the log densities of network meta-analyses (yellow: high, green: moderate, blue: low) Dotted red lines illustrate the 1st and 99th percentiles.

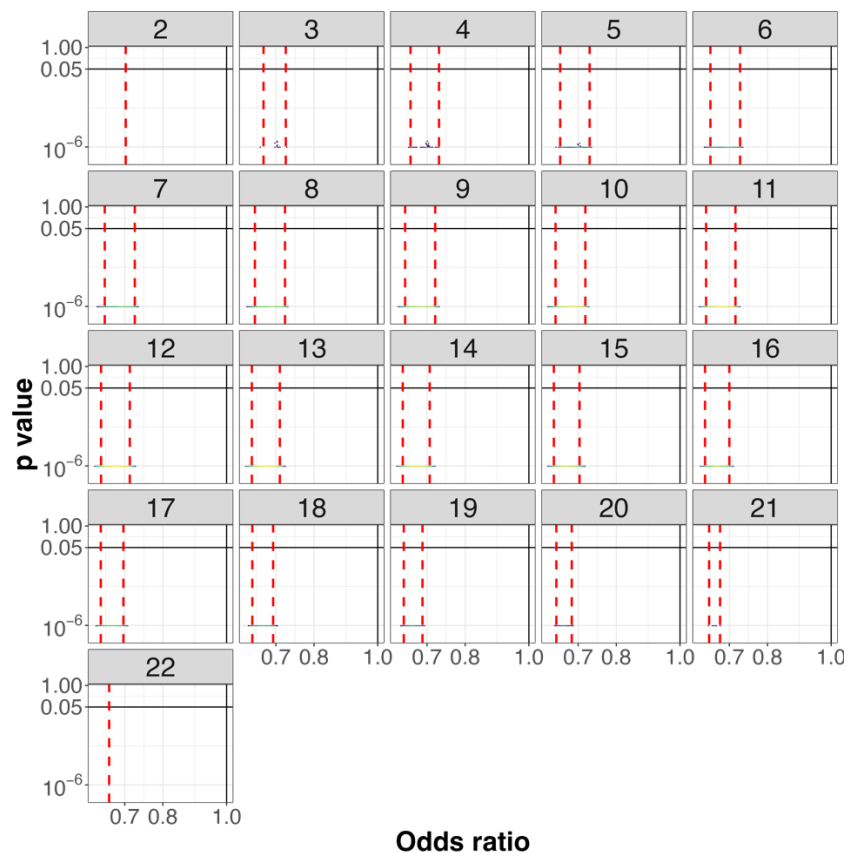

**e-figure 75:** Vibration of effects for treatment response for the comparisons of placebo with fluoxetine depending on the number of treatments included in the NMA. An Odds ratio  $>1$  favors fluoxetine. The Colors indicate the log densities of network meta-analyses (yellow: high, green: moderate, blue: low) Dotted red lines illustrate the 1st and 99th percentiles.

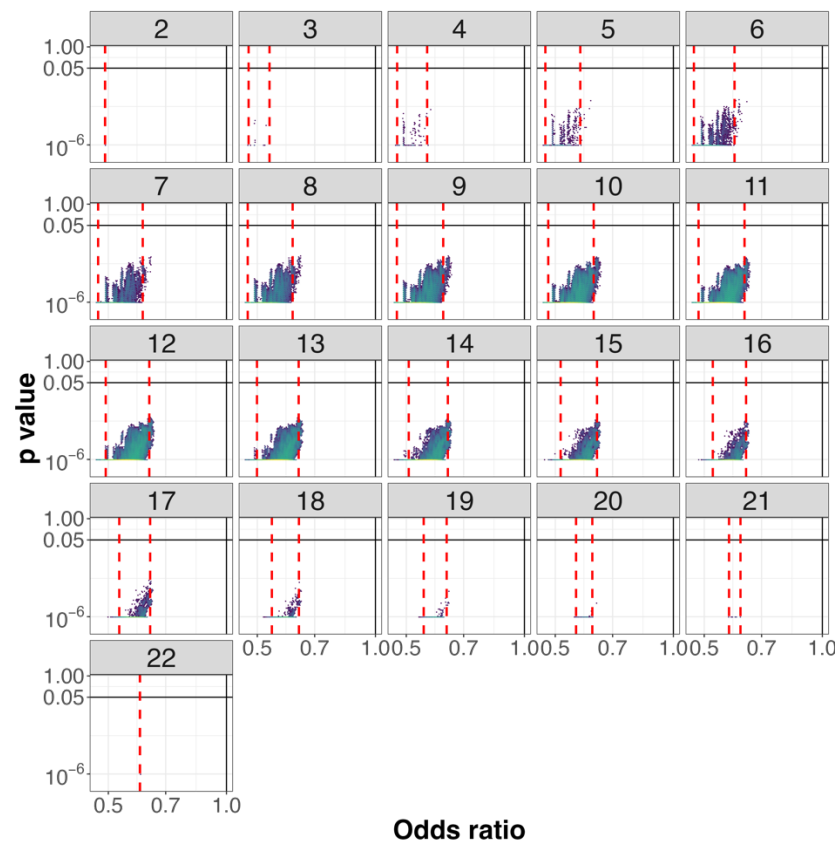

**e-figure 76:** Vibration of effects for treatment response for the comparisons of placebo with fluvoxamine depending on the number of treatments included in the NMA. An Odds ratio  $>1$  favors fluvoxamine. The Colors indicate the log densities of network meta-analyses (yellow: high, green: moderate, blue: low) Dotted red lines illustrate the 1st and 99th percentiles.



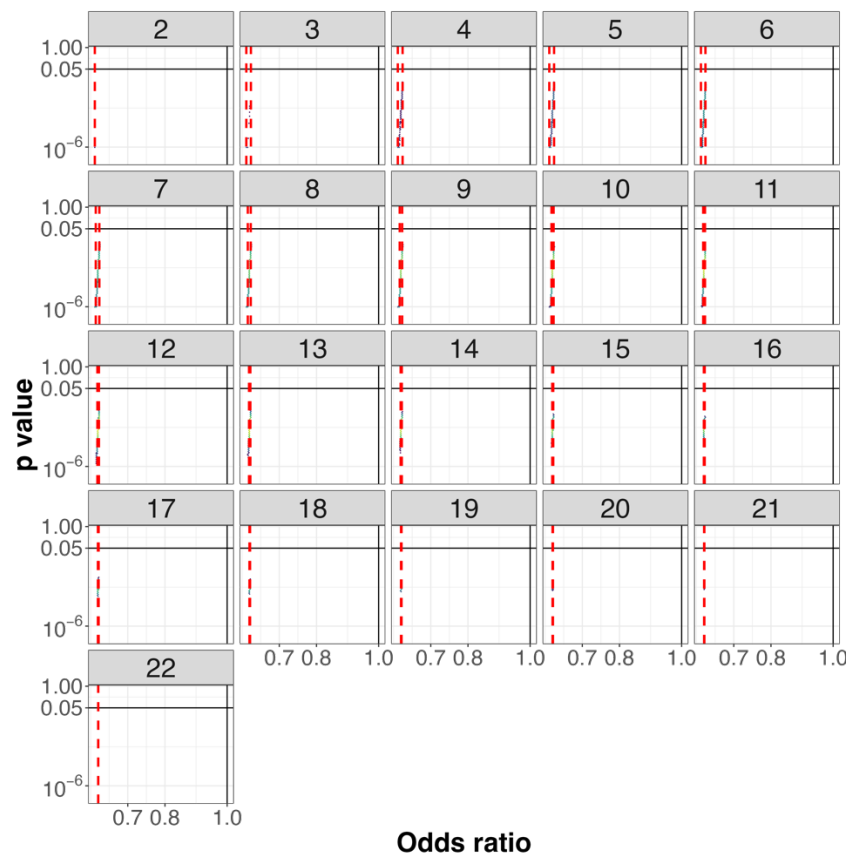

**e-figure 77:** Vibration of effects for treatment response for the comparisons of placebo with levomilnacipran depending on the number of treatments included in the NMA. An Odds ratio >1 favors levomilnacipran. The Colors indicate the log densities of network meta-analyses (yellow: high, green: moderate, blue: low) Dotted red lines illustrate the 1st and 99th percentiles.

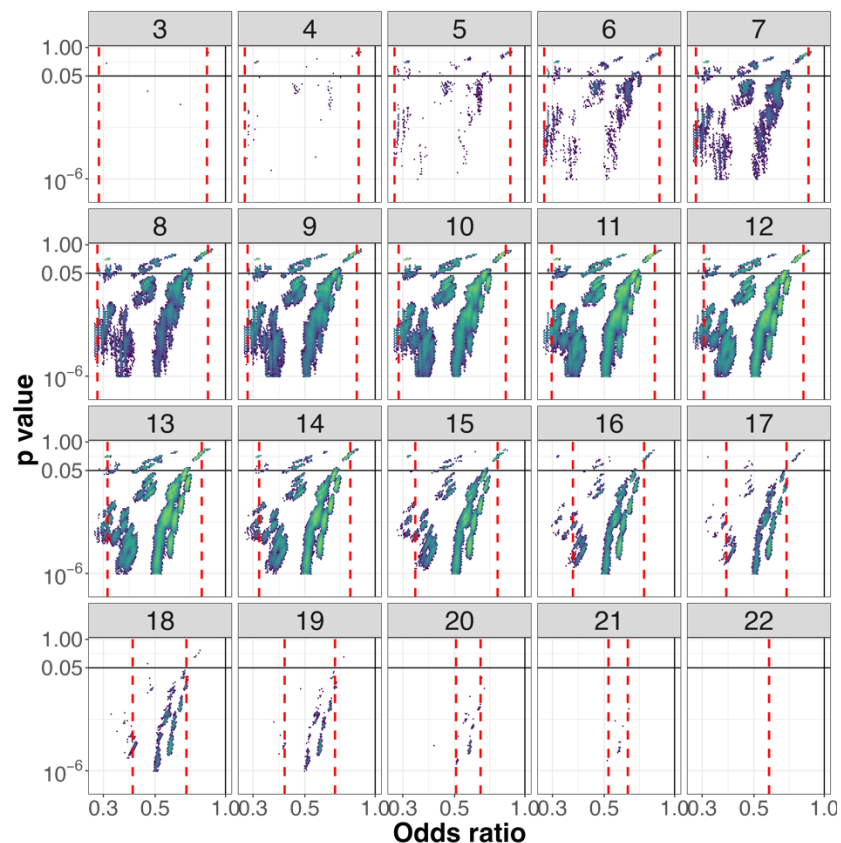

**e-figure 78:** Vibration of effects for treatment response for the comparisons of placebo with milnacipran depending on the number of treatments included in the NMA. An Odds ratio >1 favors milnacipran. The Colors indicate the log densities of network meta-analyses (yellow: high, green: moderate, blue: low) Dotted red lines illustrate the 1st and 99th percentiles.

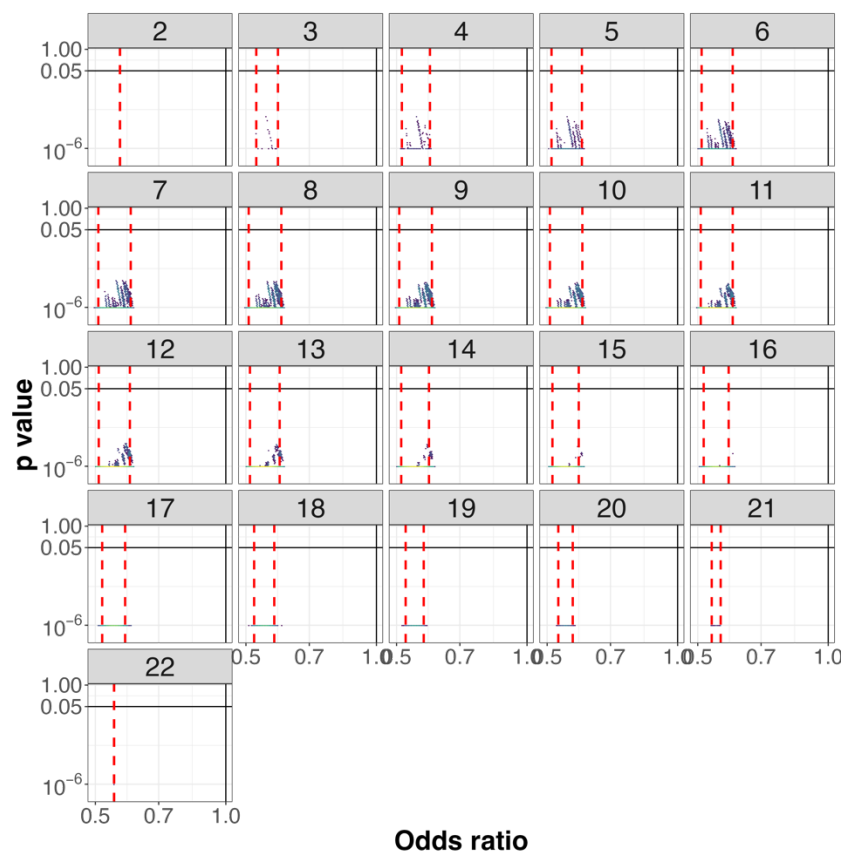

**e-figure 79:** Vibration of effects for treatment response for the comparisons of placebo with mirtazapine depending on the number of treatments included in the NMA. An Odds ratio  $>1$  favors mirtazapine. The Colors indicate the log densities of network meta-analyses (yellow: high, green: moderate, blue: low) Dotted red lines illustrate the 1st and 99th percentiles.

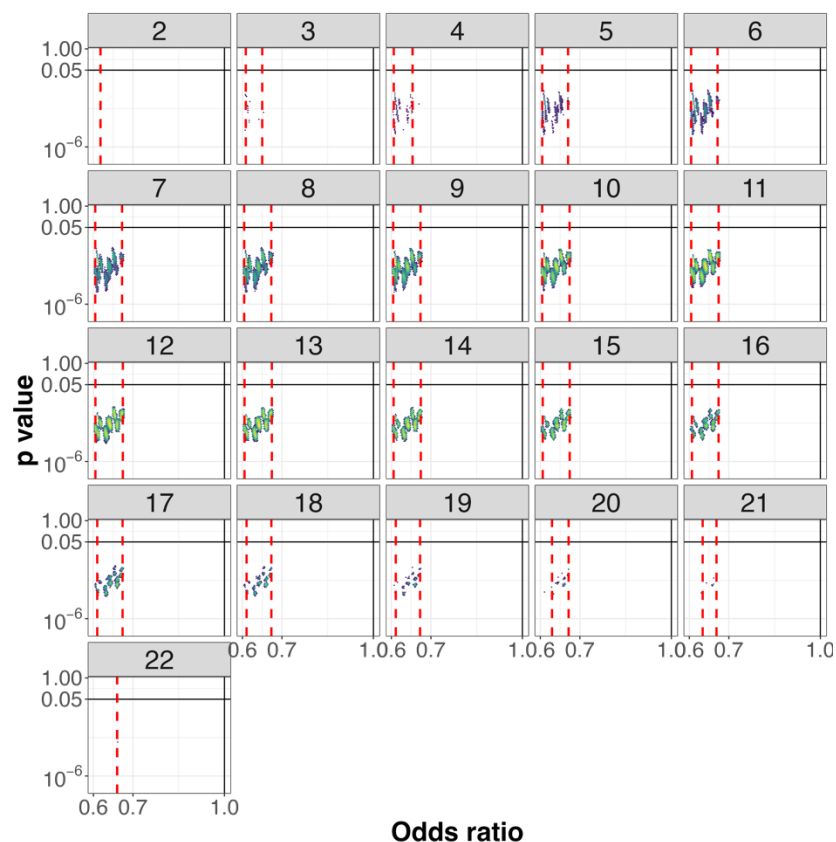

**e-figure 80:** Vibration of effects for treatment response for the comparisons of placebo with nefazodone depending on the number of treatments included in the NMA. An Odds ratio  $>1$  favors nefazodone. The Colors indicate the log densities of network meta-analyses (yellow: high, green: moderate, blue: low) Dotted red lines illustrate the 1st and 99th percentiles.

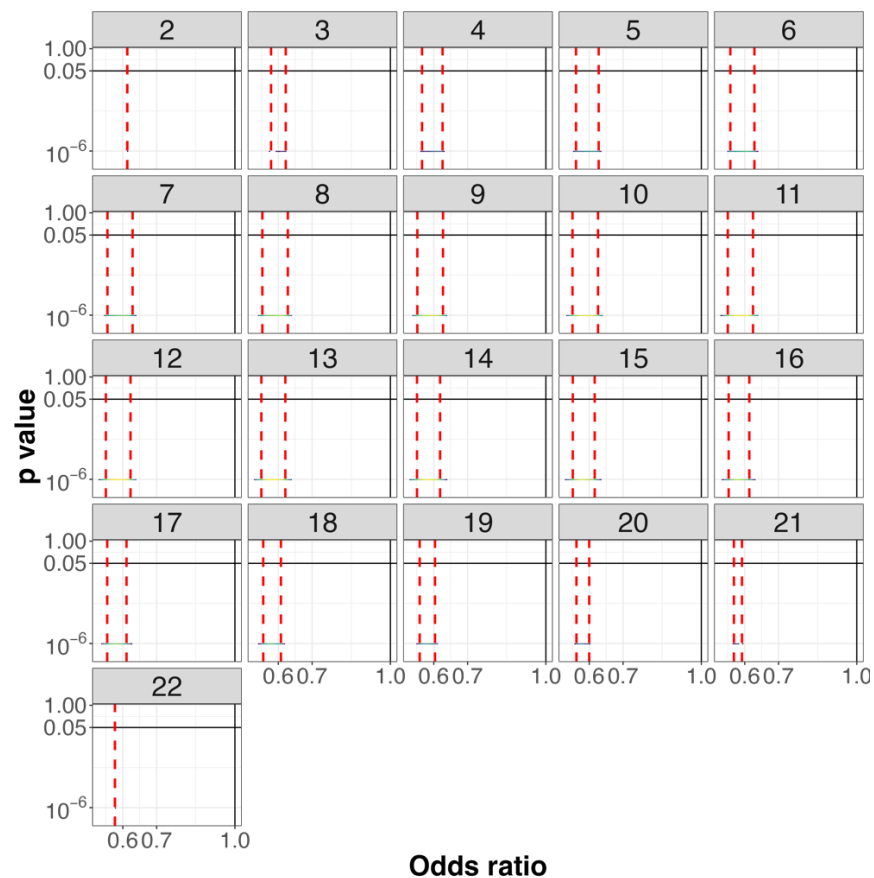

**e-figure 81:** Vibration of effects for treatment response for the comparisons of placebo with paroxetine depending on the number of treatments included in the NMA. An Odds ratio >1 favors paroxetine. The Colors indicate the log densities of network meta-analyses (yellow: high, green: moderate, blue: low) Dotted red lines illustrate the 1st and 99th percentiles.

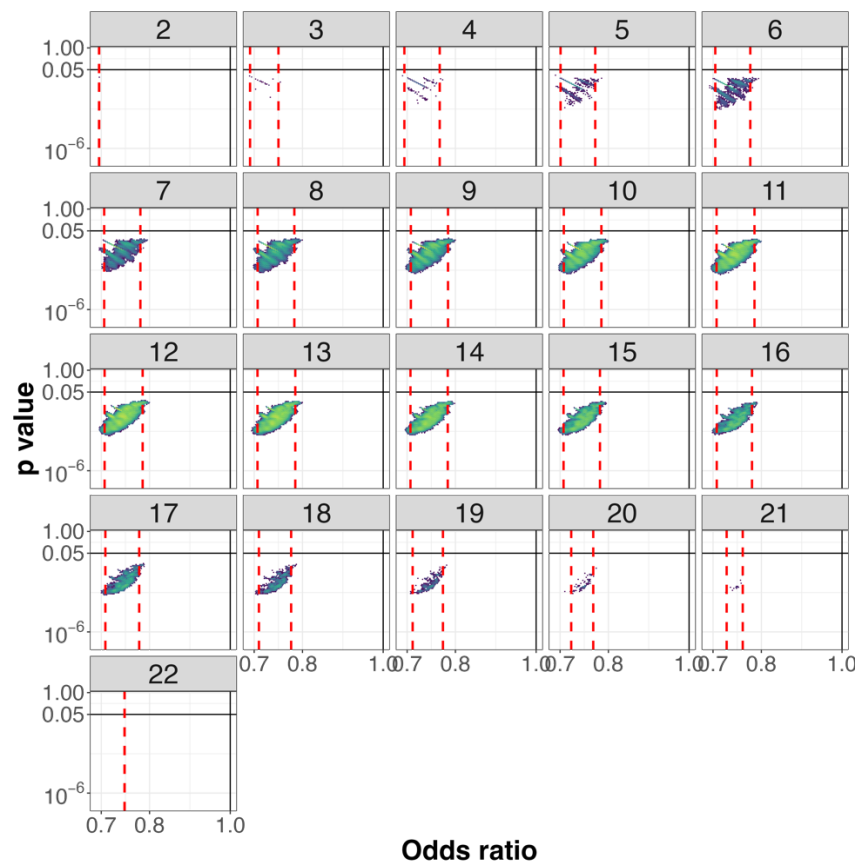

**e-figure 82:** Vibration of effects for treatment response for the comparisons of placebo with reboxetine depending on the number of treatments included in the NMA. An Odds ratio >1 favors reboxetine. The Colors indicate the log densities of network meta-analyses (yellow: high, green: moderate, blue: low) Dotted red lines illustrate the 1st and 99th percentiles.

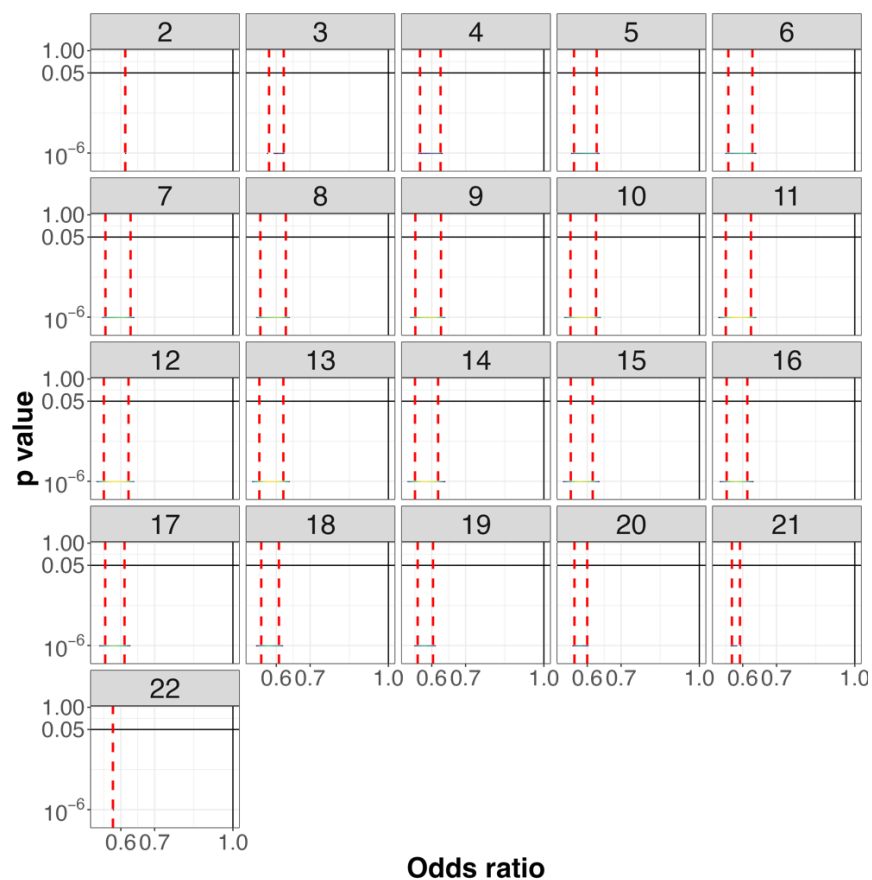

**e-figure 83:** Vibration of effects for treatment response for the comparisons of placebo with sertraline depending on the number of treatments included in the NMA. An Odds ratio >1 favors sertraline. The Colors indicate the log densities of network meta-analyses (yellow: high, green: moderate, blue: low) Dotted red lines illustrate the 1st and 99th percentiles.

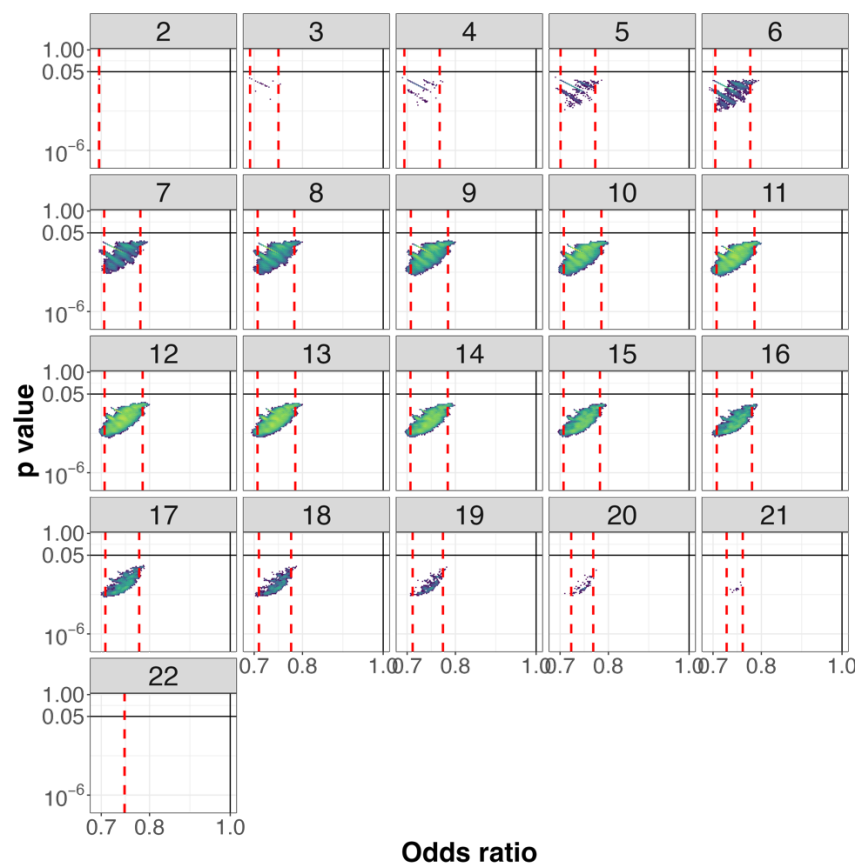

**e-figure 84:** Vibration of effects for treatment response for the comparisons of placebo with trazodone depending on the number of treatments included in the NMA. An Odds ratio >1 favors trazodone. The Colors indicate the log densities of network meta-analyses (yellow: high, green: moderate, blue: low) Dotted red lines illustrate the 1st and 99th percentiles.

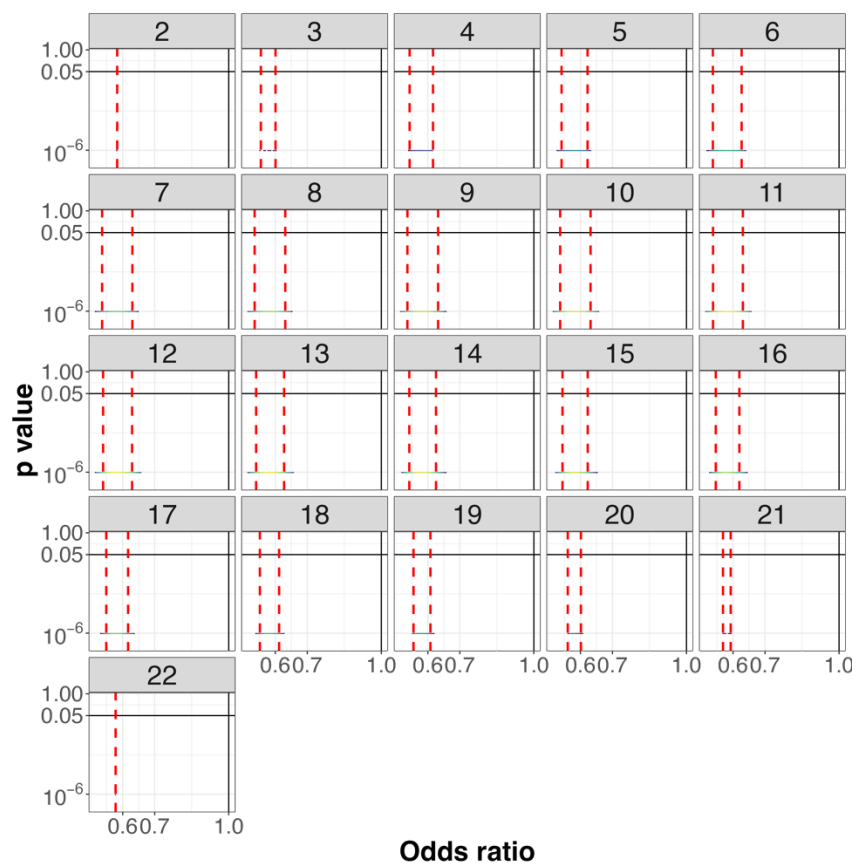

Odds ratio

**e-figure 85:** Vibration of effects for treatment response for the comparisons of placebo with venlafaxine depending on the number of treatments included in the NMA. An Odds ratio >1 favors venlafaxine. The Colors indicate the log densities of network meta-analyses (yellow: high, green: moderate, blue: low) Dotted red lines illustrate the 1st and 99th percentiles.

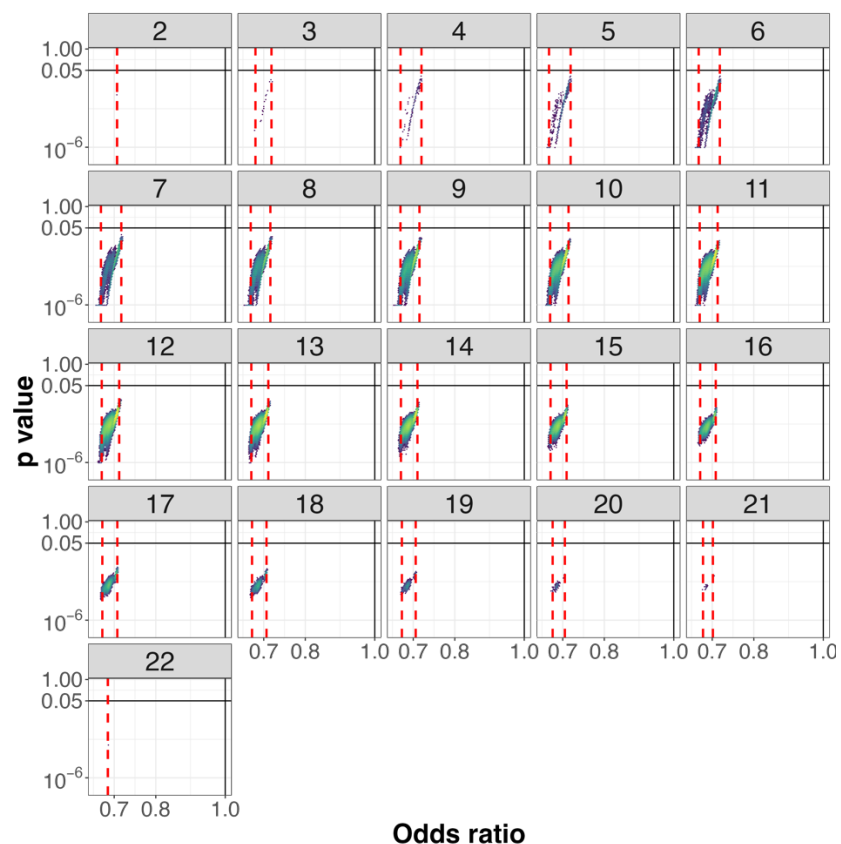

Odds ratio

**e-figure 86:** Vibration of effects for treatment response for the comparisons of placebo with vilazodone depending on the number of treatments included in the NMA. An Odds ratio >1 favors vilazodone. The Colors indicate the log densities of network meta-analyses (yellow: high, green: moderate, blue: low) Dotted red lines illustrate the 1st and 99th percentiles.

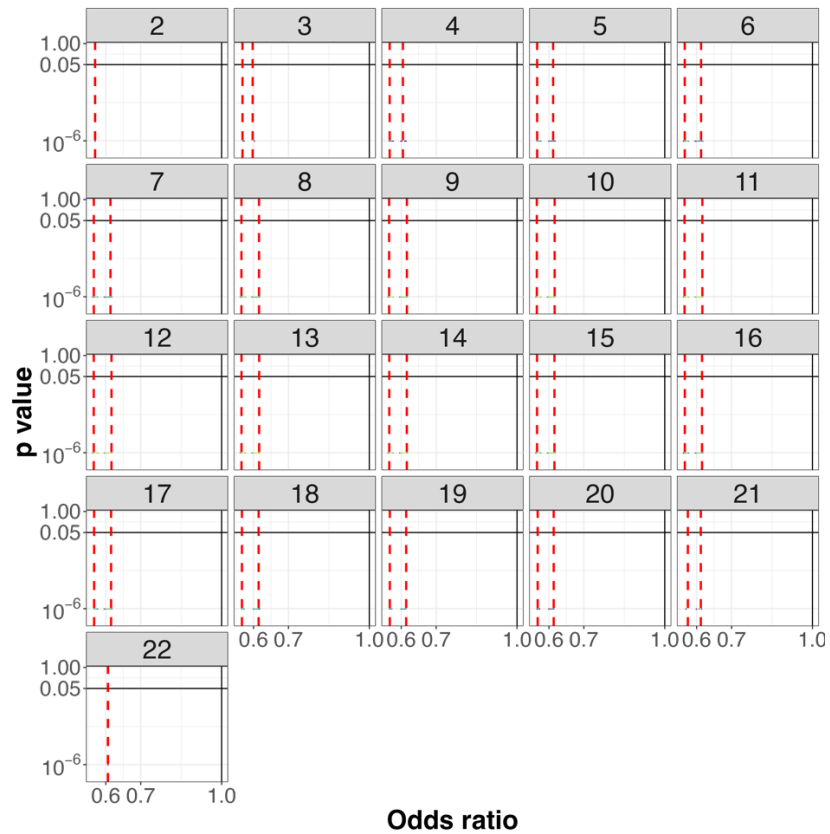

**e-figure 87:** *Vibration of effects for treatment response for the comparisons of placebo with vortioxetine depending on the number of treatments included in the NMA. An Odds ratio >1 favors vortioxetine. The Colors indicate the log densities of network meta-analyses (yellow: high, green: moderate, blue: low) Dotted red lines illustrate the 1st and 99th percentiles.*
